# Supplementary material
Source: ML conference proceedings conference paper supplement (https://openreview.net/forum?id=EWT4GxjGDS)
Supplement: supplementary_material [file attachment]

Average User weight

0.200  
0.175  
0.150  
0.125  
0.100  
0.075  
0.050  
0.025  
0.000

0

1

2

3

4

5

6

7

8

9

feature #

Fraction of Producers

0.200  
0.175  
0.150  
0.125  
0.100  
0.075  
0.050  
0.025  
0.000
