# Supplementary material (part 1 of 2)
Source: ML conference proceedings conference paper supplement (https://openreview.net/forum?id=EWT4GxjGDS)

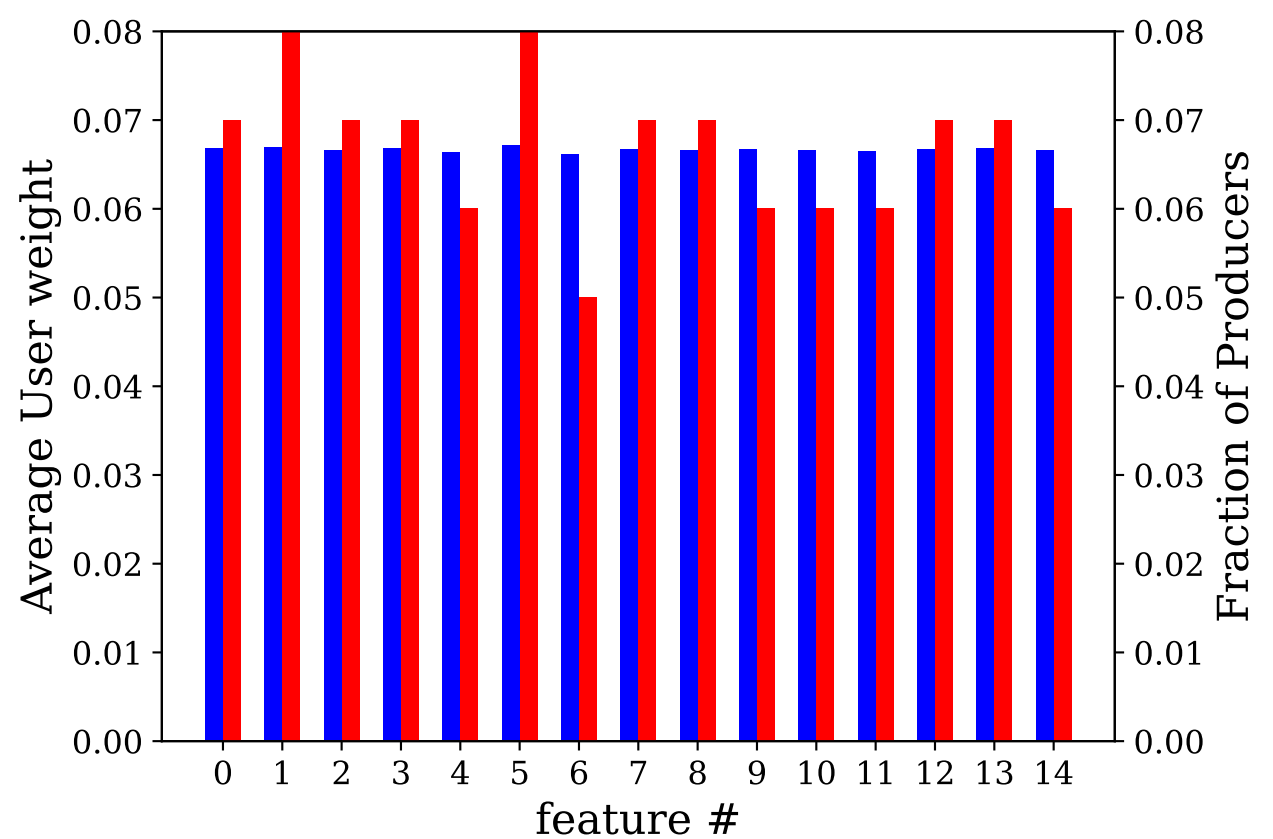

Supplement: supplementary_material [file attachment]

Average User weight

Fraction of Producers

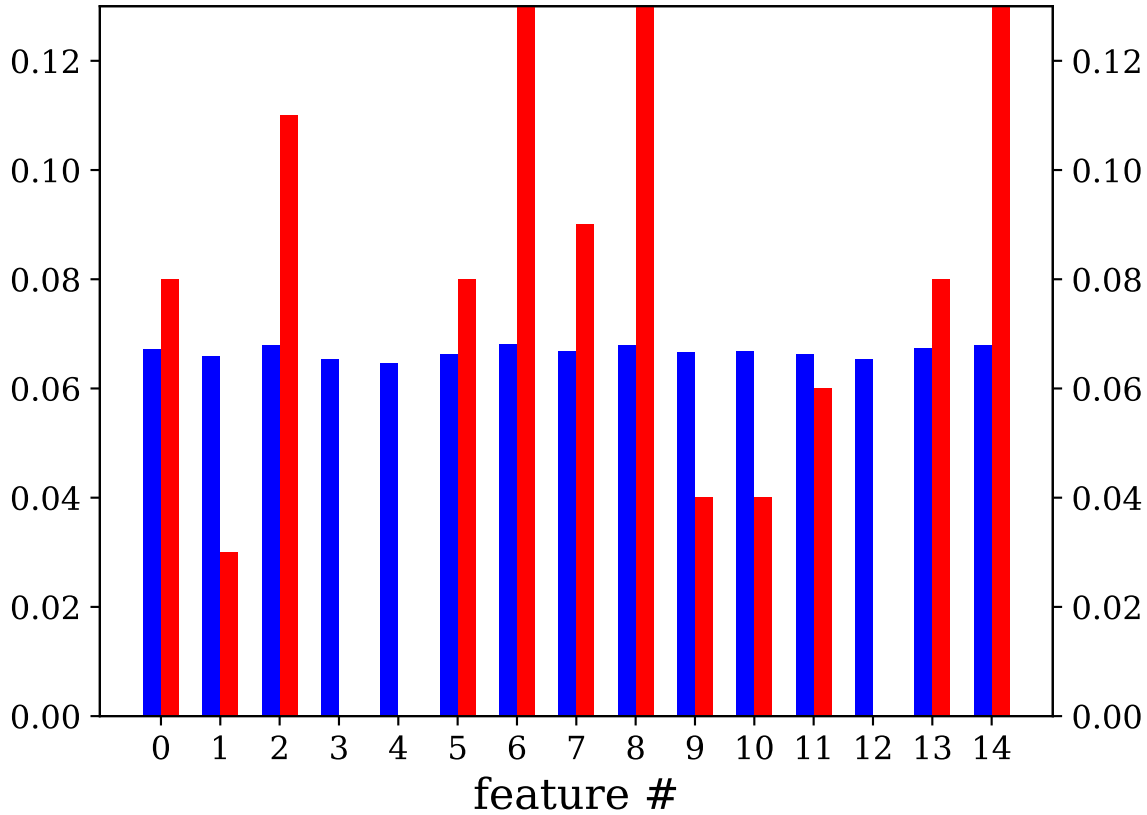

Supplement: supplementary_material [file attachment]

Average producer utility

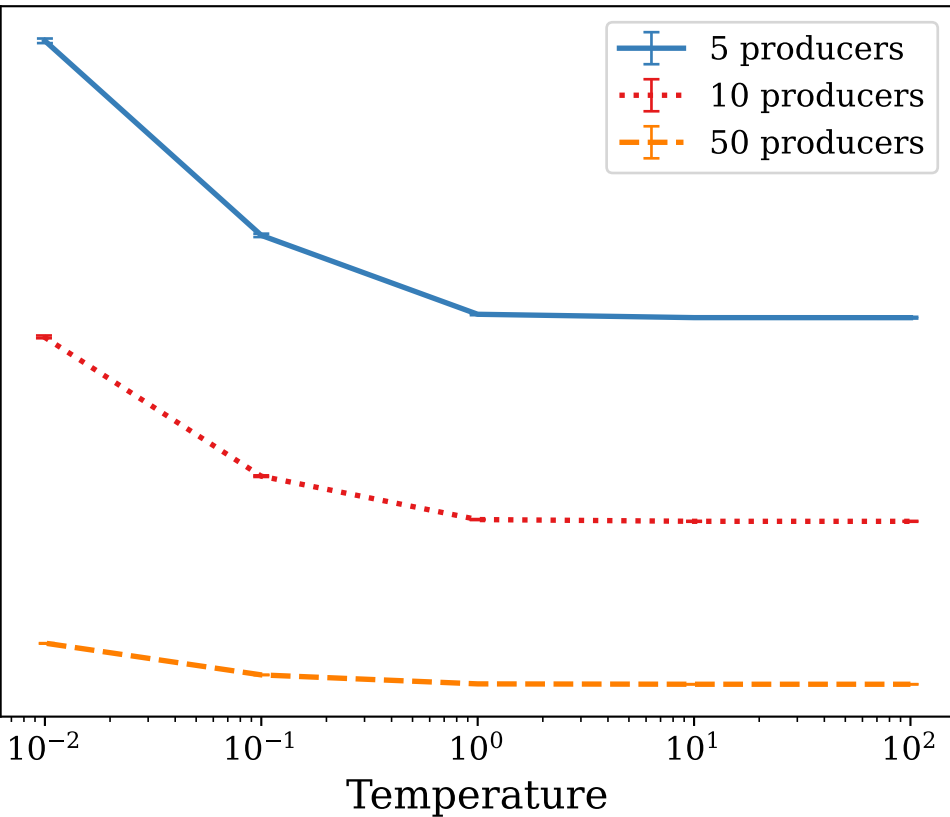

Supplement: supplementary_material [file attachment]

Average User weight

Fraction of Producers

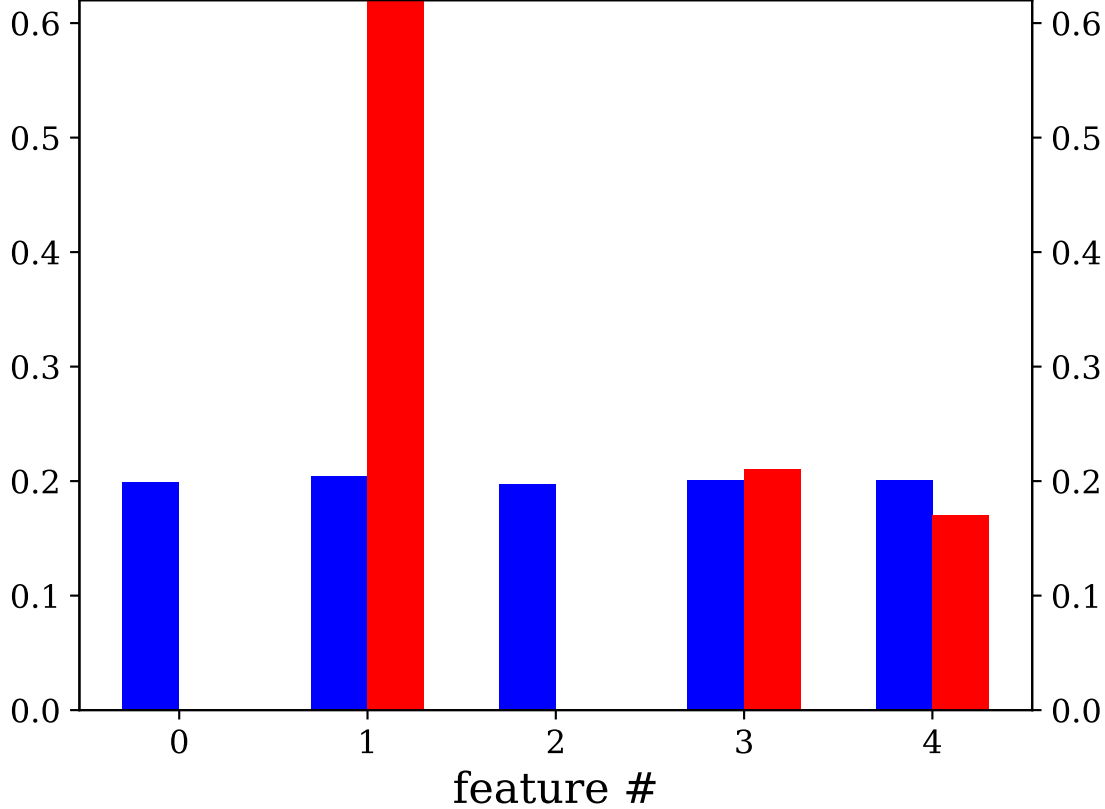

Supplement: supplementary_material [file attachment]

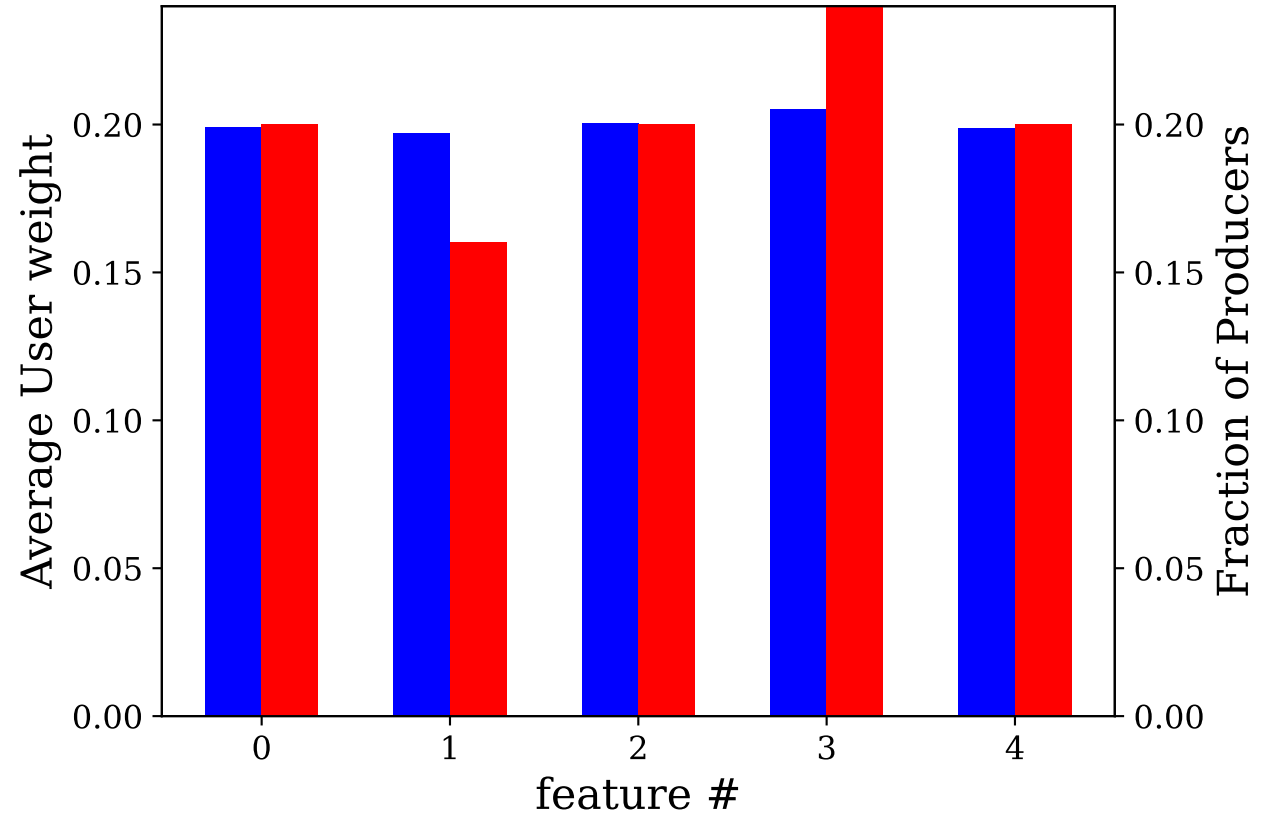

Supplement: supplementary_material [file attachment]

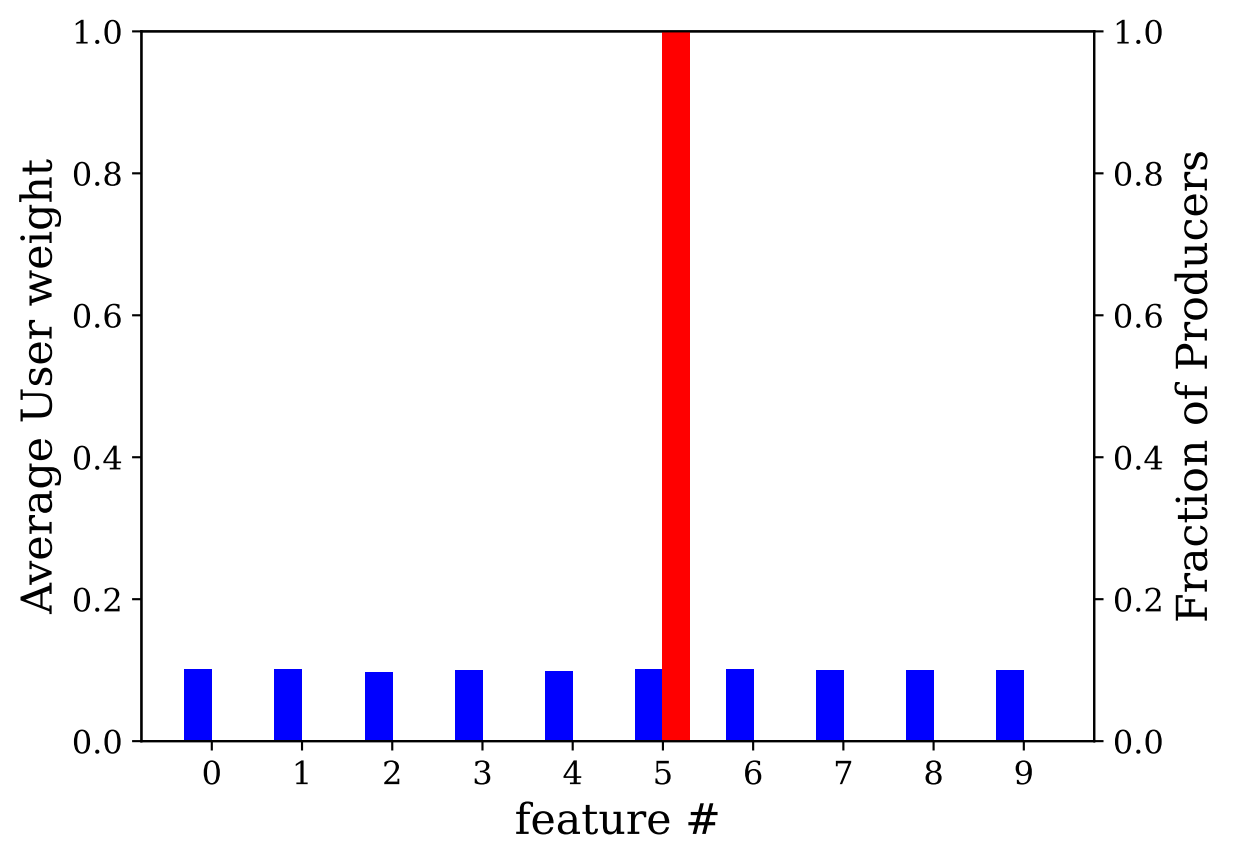

Supplement: supplementary_material [file attachment]

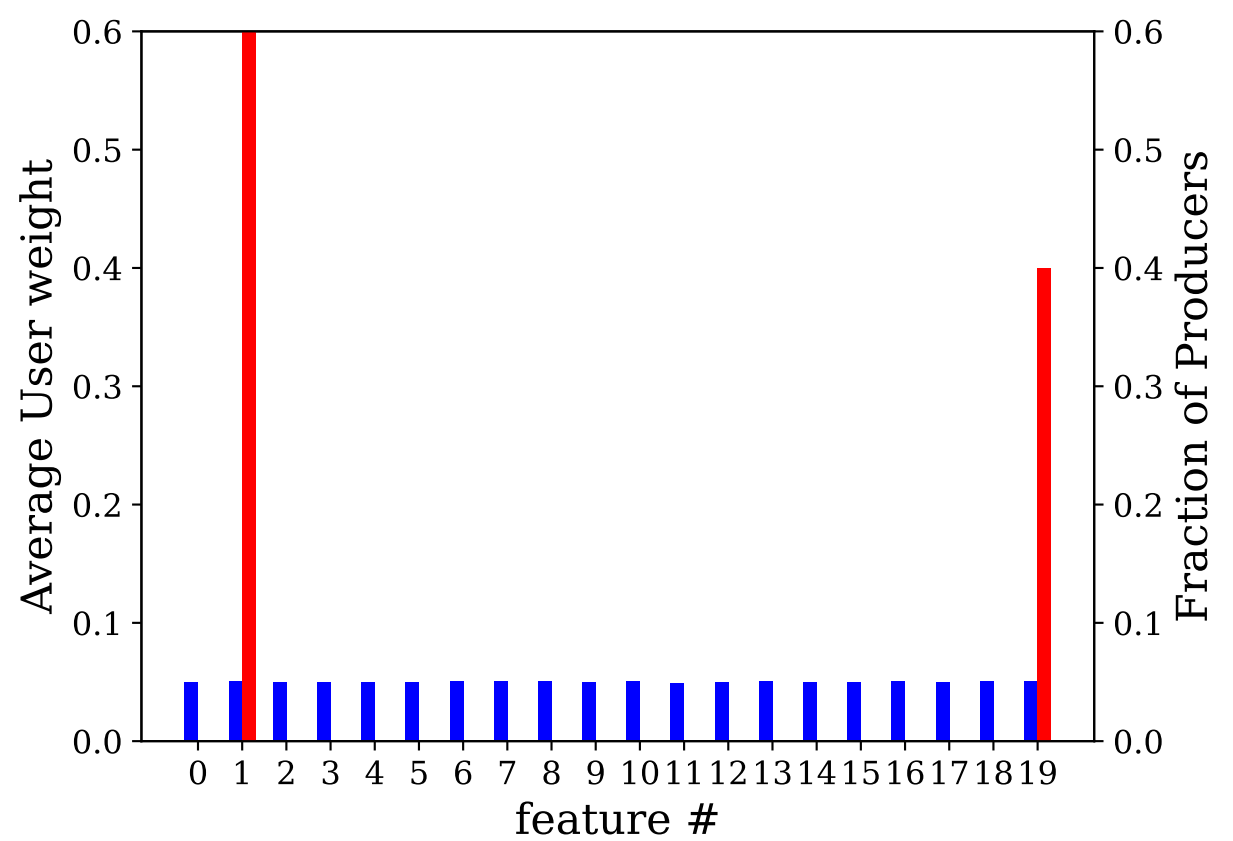

Supplement: supplementary_material [file attachment]

Average User weight

Fraction of Producers

0.6  
0.5  
0.4  
0.3  
0.2  
0.1  
0.0

0.6  
0.5  
0.4  
0.3  
0.2  
0.1  
0.0

0

1

2

3

4

feature #

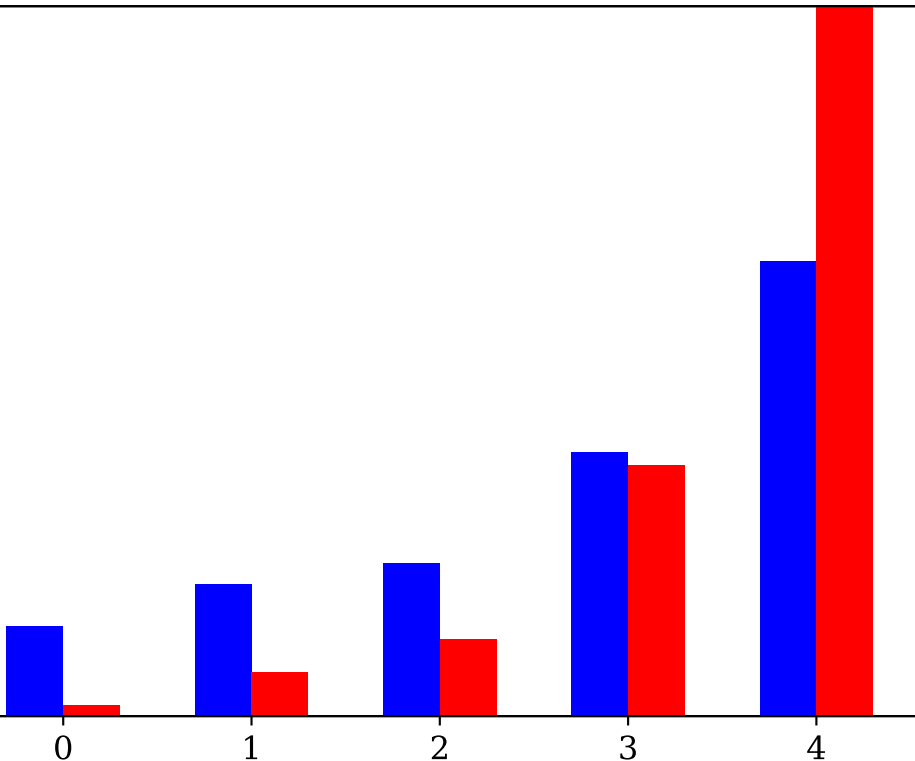

Supplement: supplementary_material [file attachment]

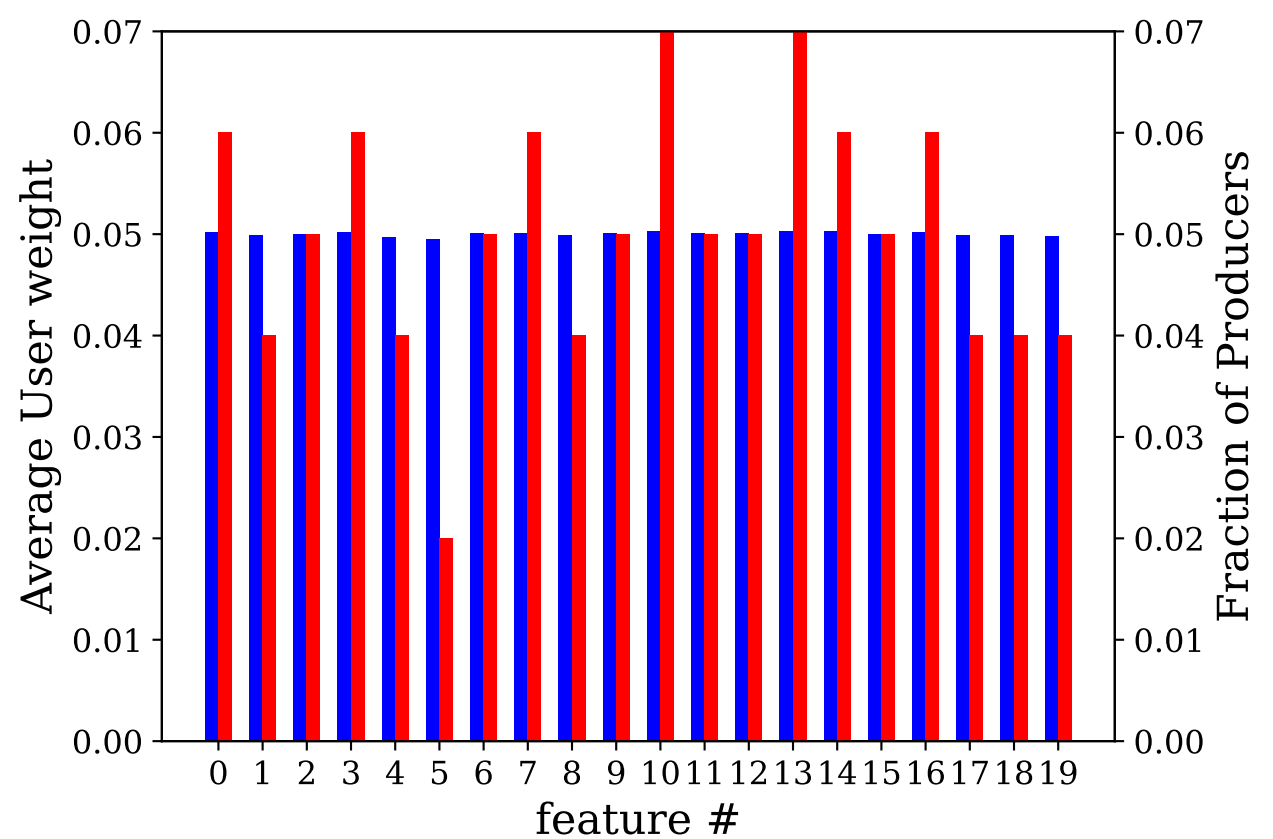

Supplement: supplementary_material [file attachment]

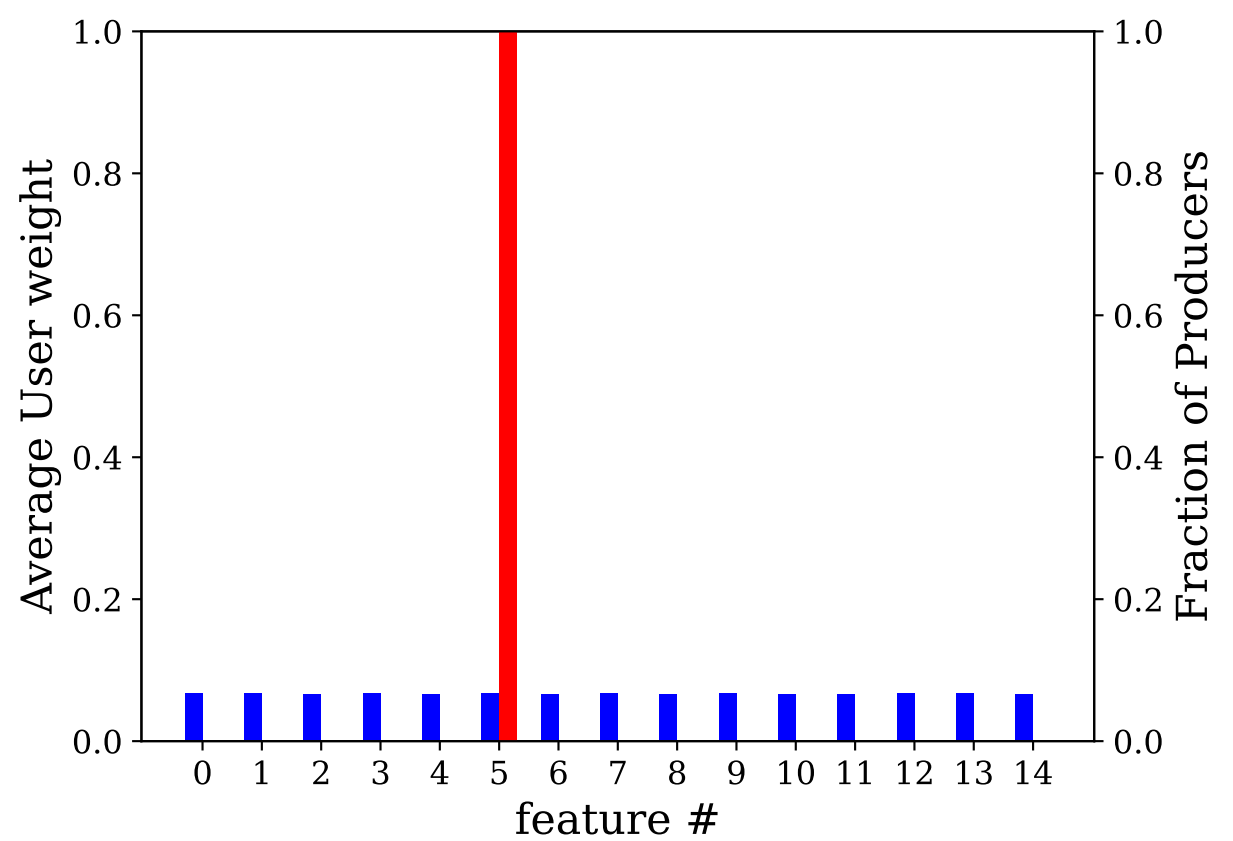

Supplement: supplementary_material [file attachment]

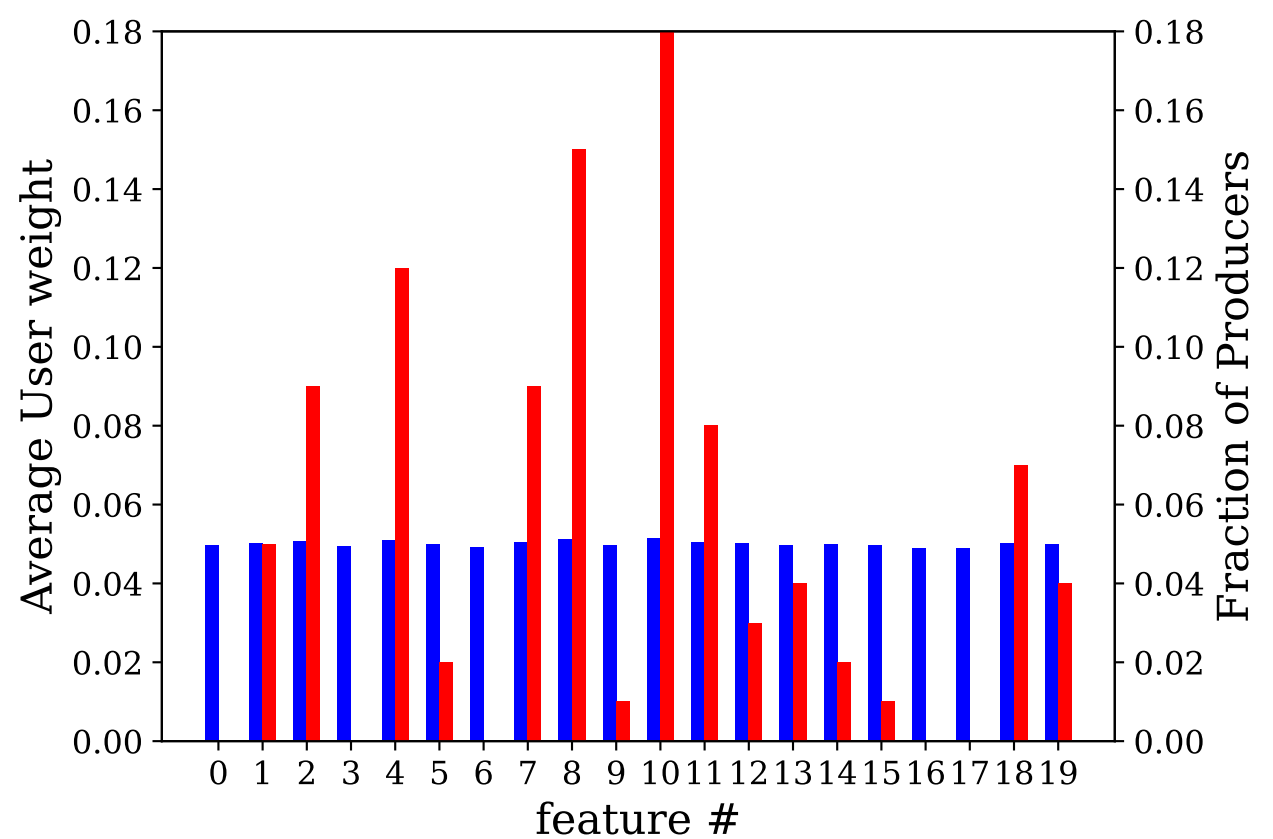

Supplement: supplementary_material [file attachment]

Average User weight

Fraction of Producers

0.10  
0.08  
0.06  
0.04  
0.02  
0.00

0.10  
0.08  
0.06  
0.04  
0.02  
0.00

0

1

2

3

4

5

6

7

8

9

feature #

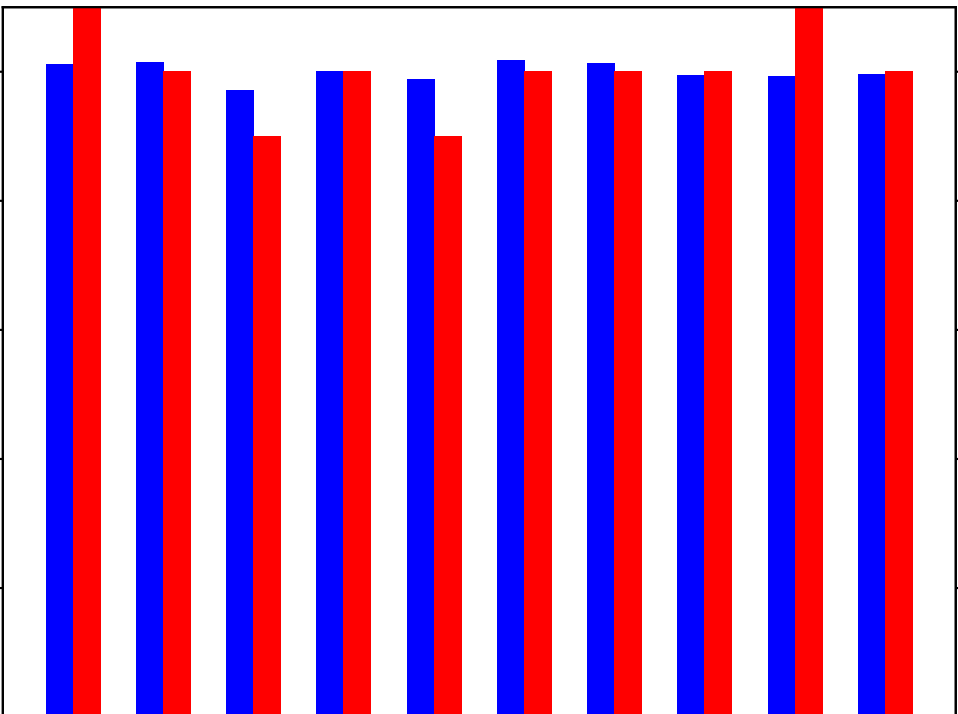

Supplement: supplementary_material [file attachment]

Average User weight

0.200  
0.175  
0.150  
0.125  
0.100  
0.075  
0.050  
0.025  
0.000

0

1

2

3

4

feature #

Fraction of Producers

0.200  
0.175  
0.150  
0.125  
0.100  
0.075  
0.050  
0.025  
0.000

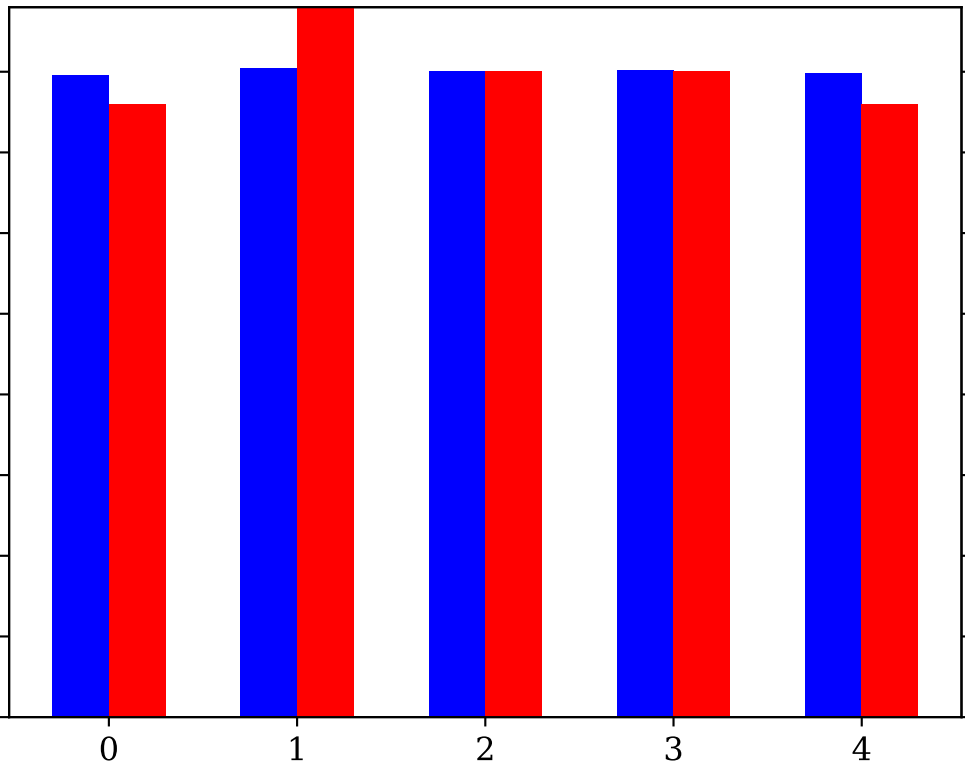

Supplement: supplementary_material [file attachment]

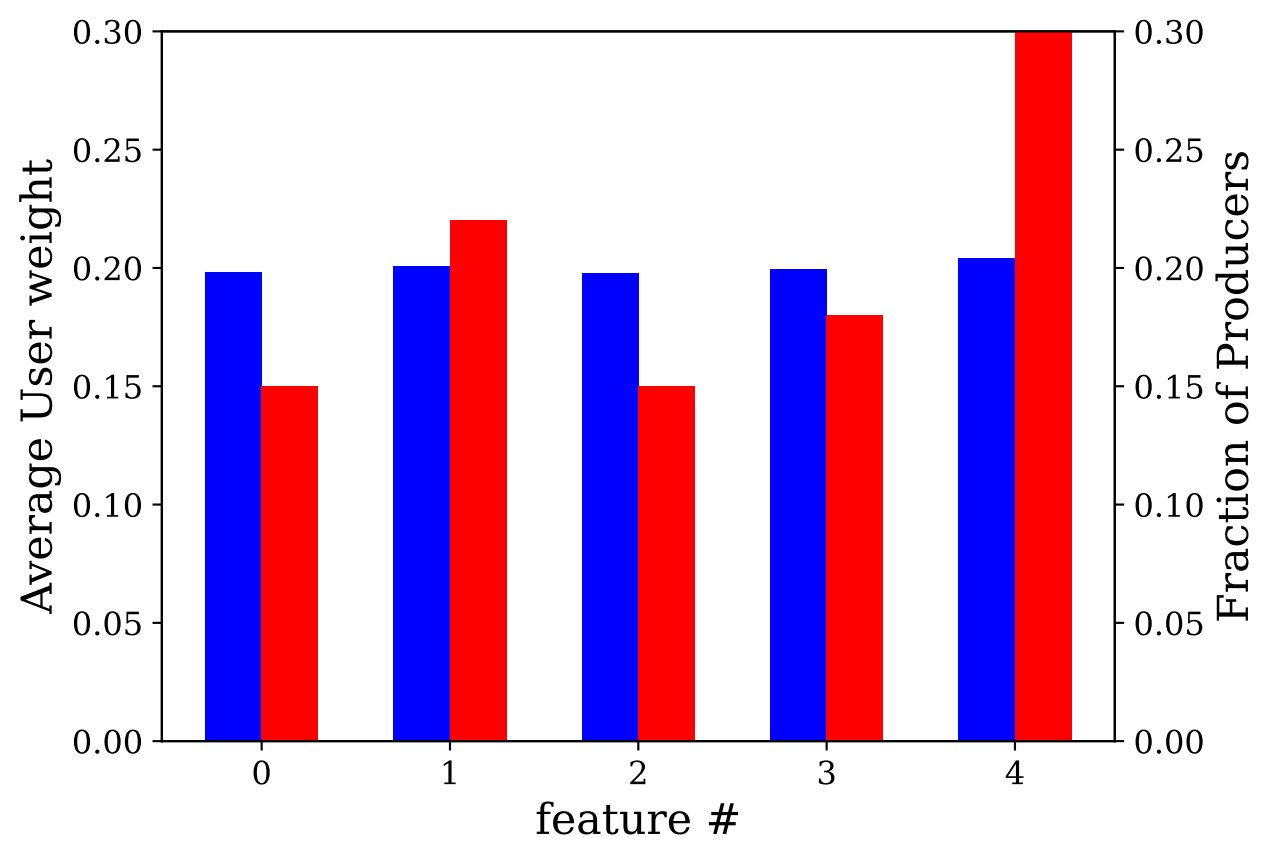

Supplement: supplementary_material [file attachment]

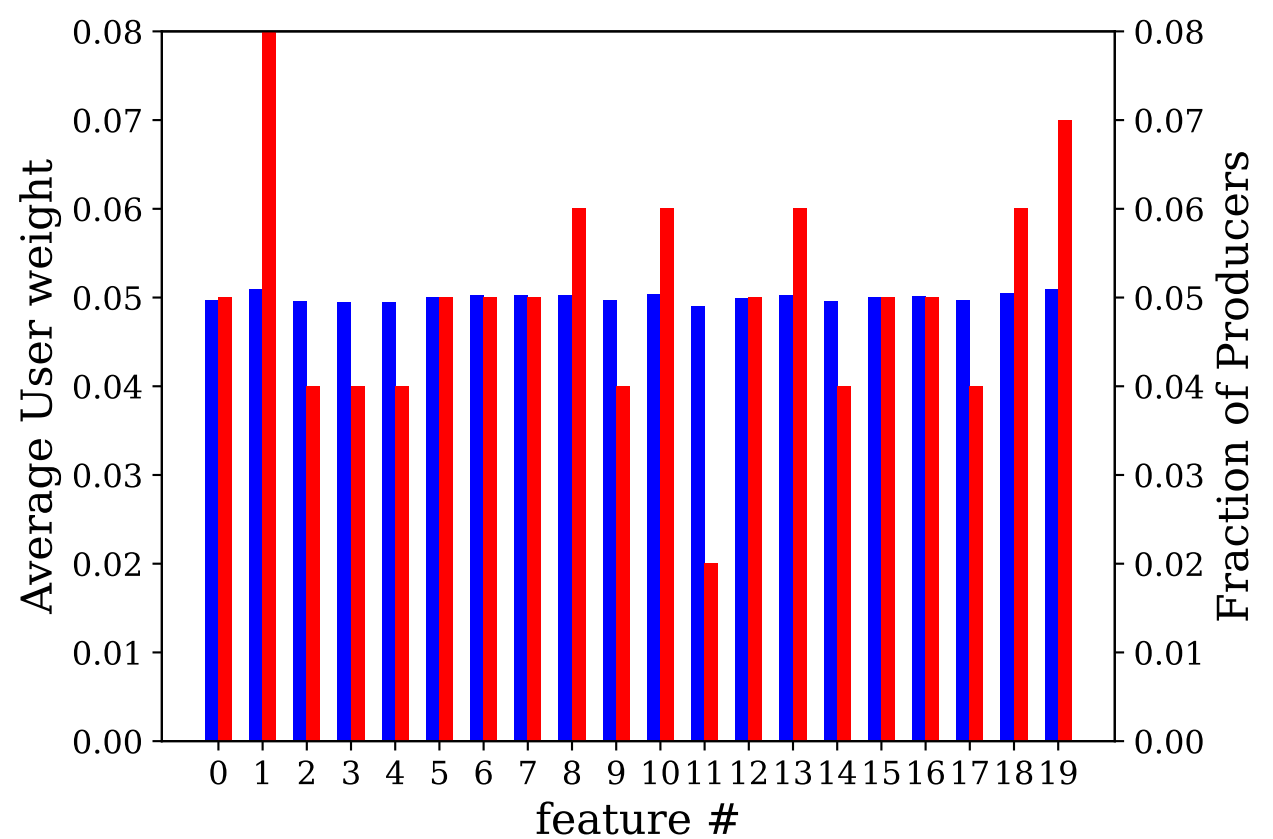

Supplement: supplementary_material [file attachment]

Average producer utility

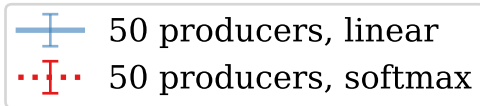

Temperature

Supplement: supplementary_material [file attachment]

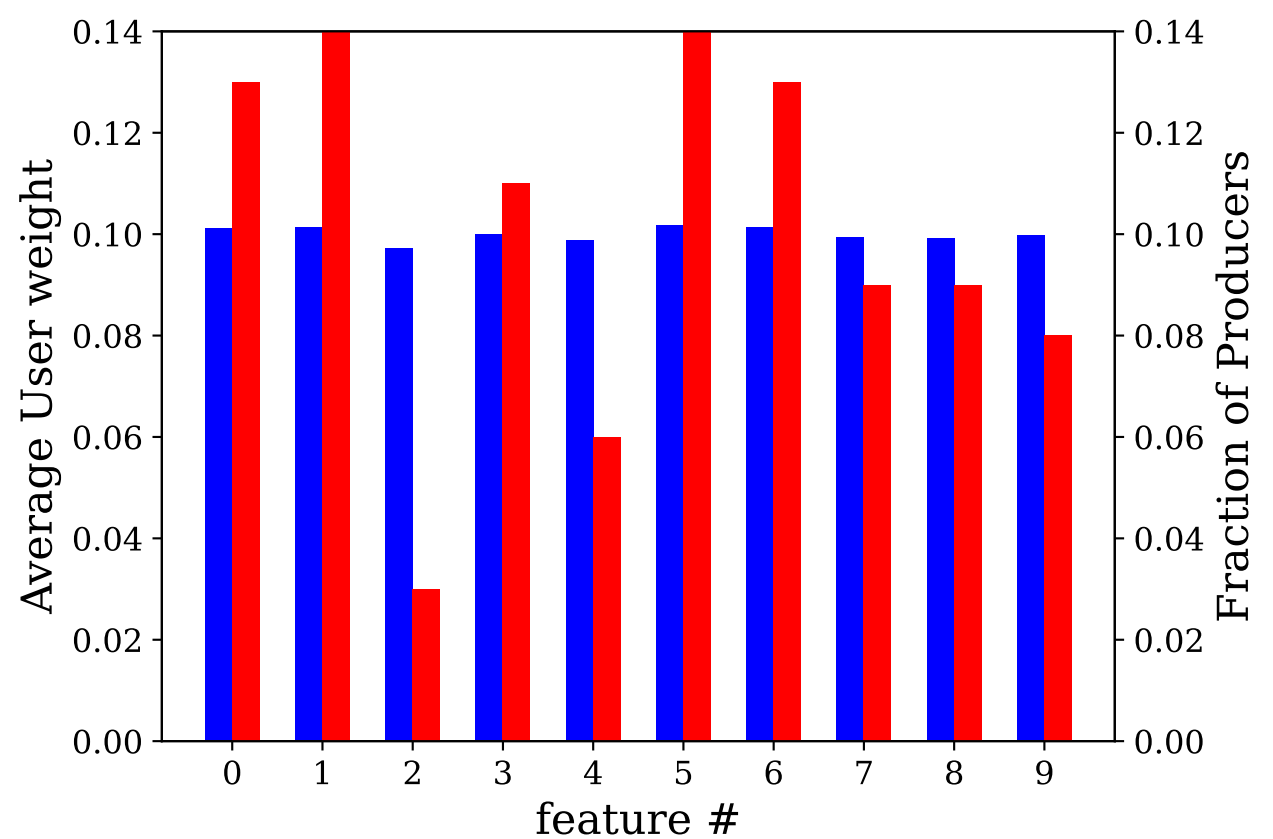

Supplement: supplementary_material [file attachment]

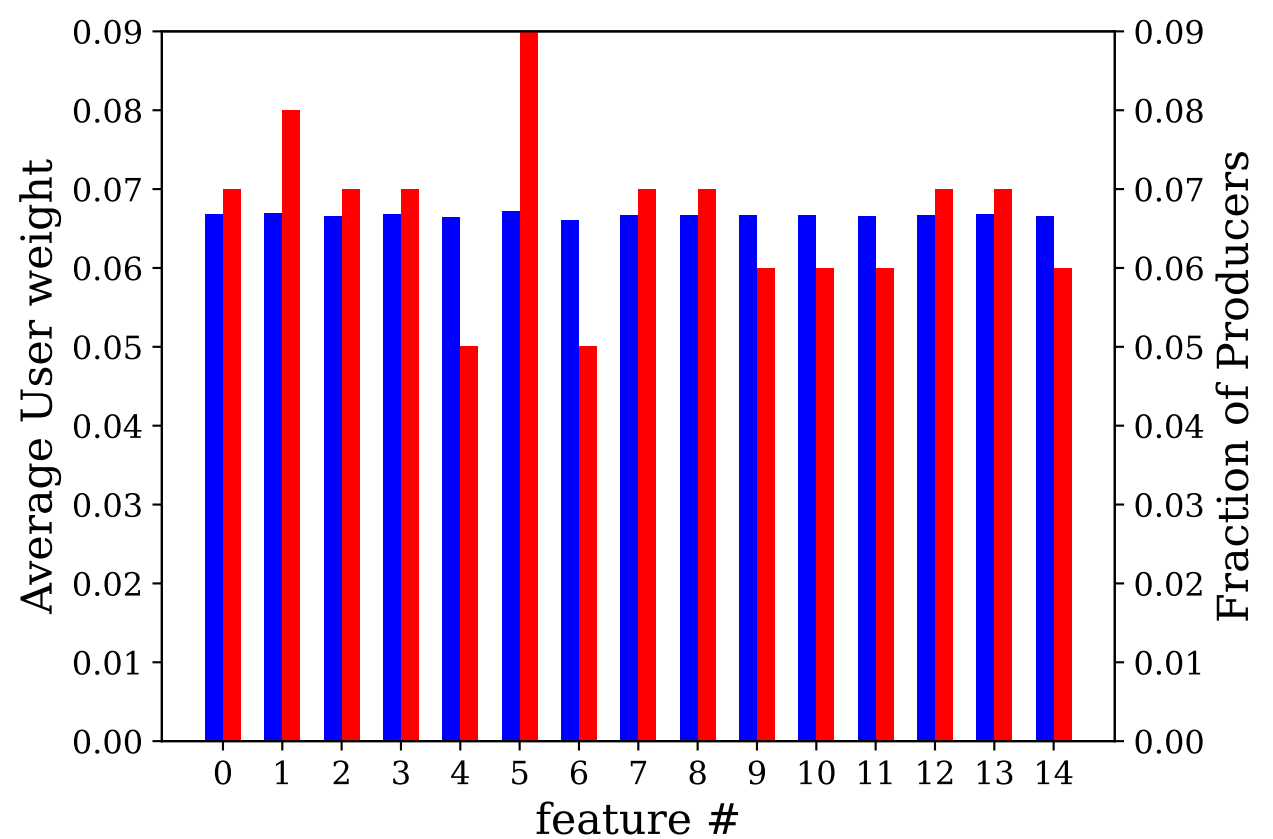

Supplement: supplementary_material [file attachment]

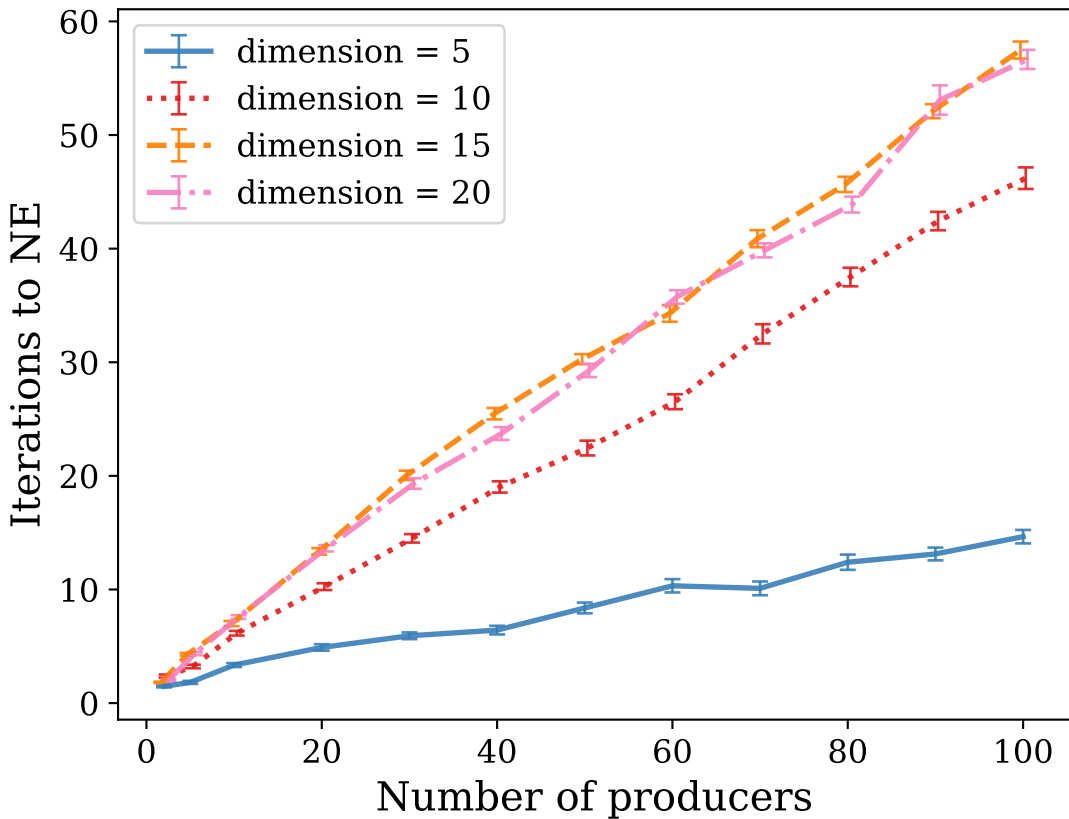

Supplement: supplementary_material [file attachment]

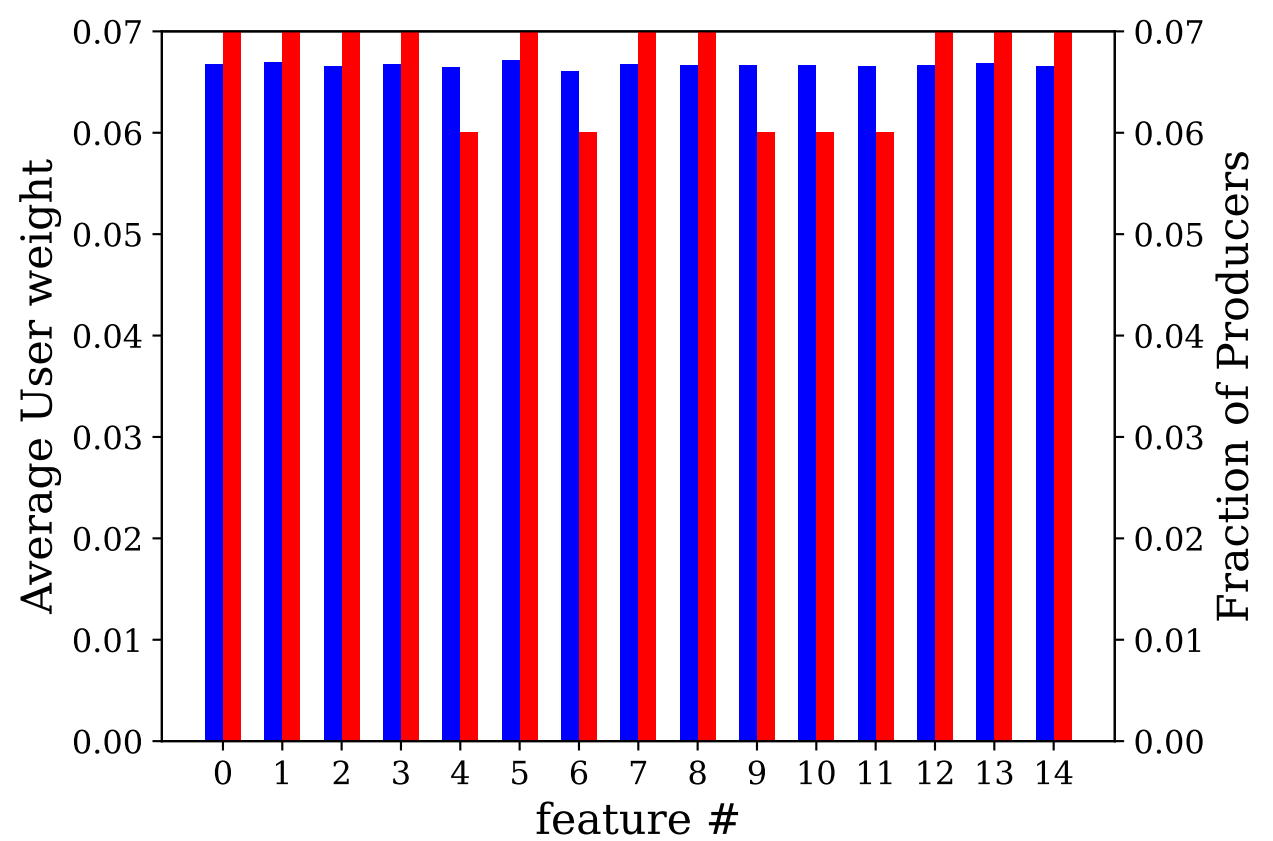

Supplement: supplementary_material [file attachment]

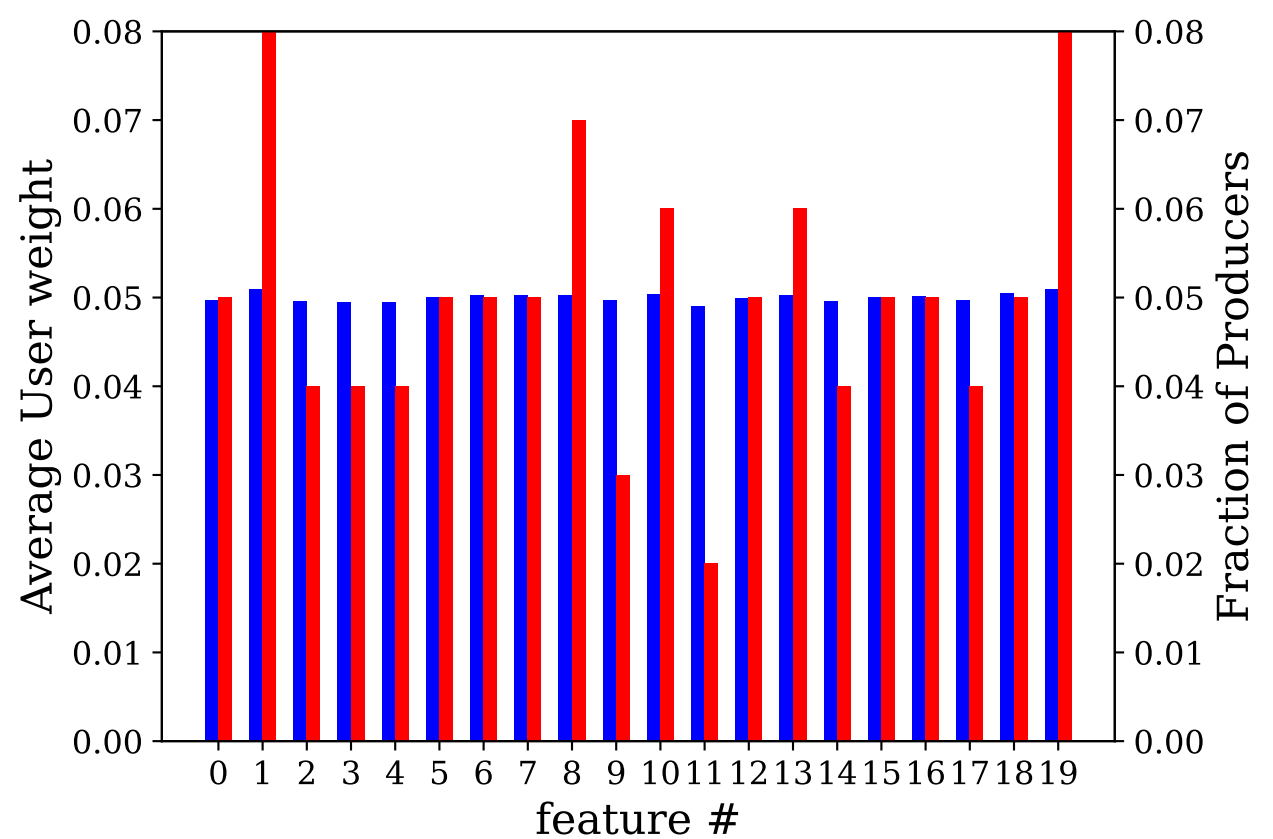

Supplement: supplementary_material [file attachment]

Average User weight

Fraction of Producers

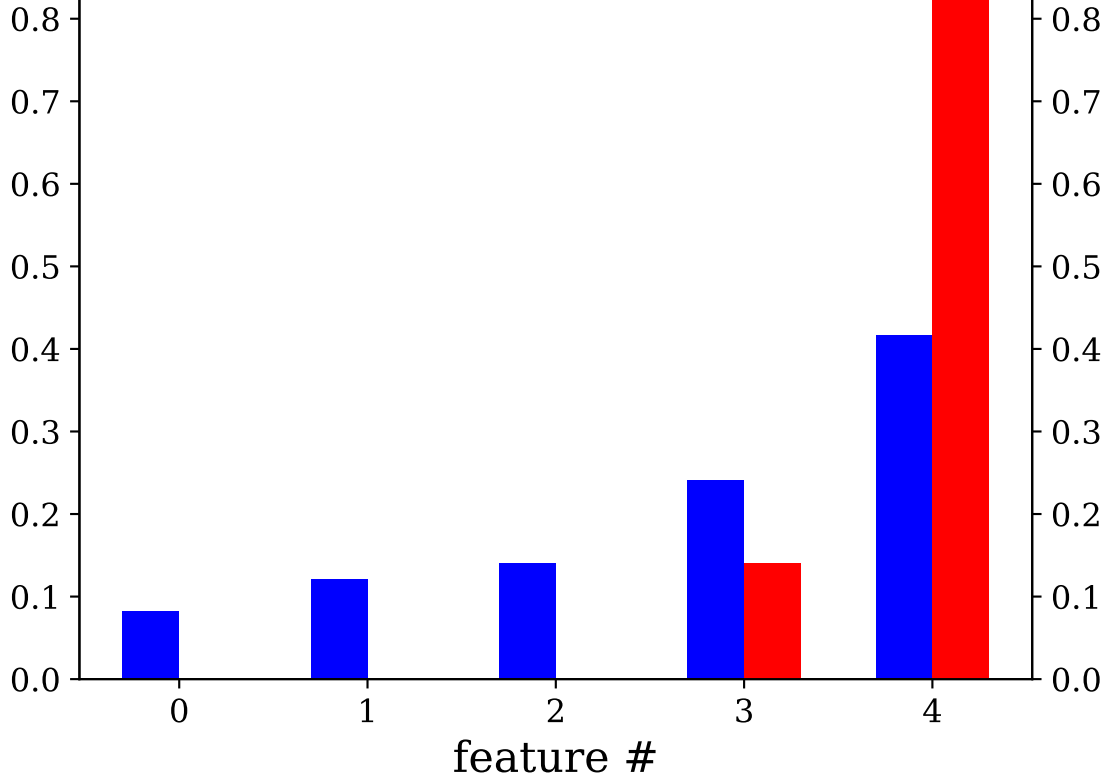

Supplement: supplementary_material [file attachment]

Average User weight

Fraction of Producers

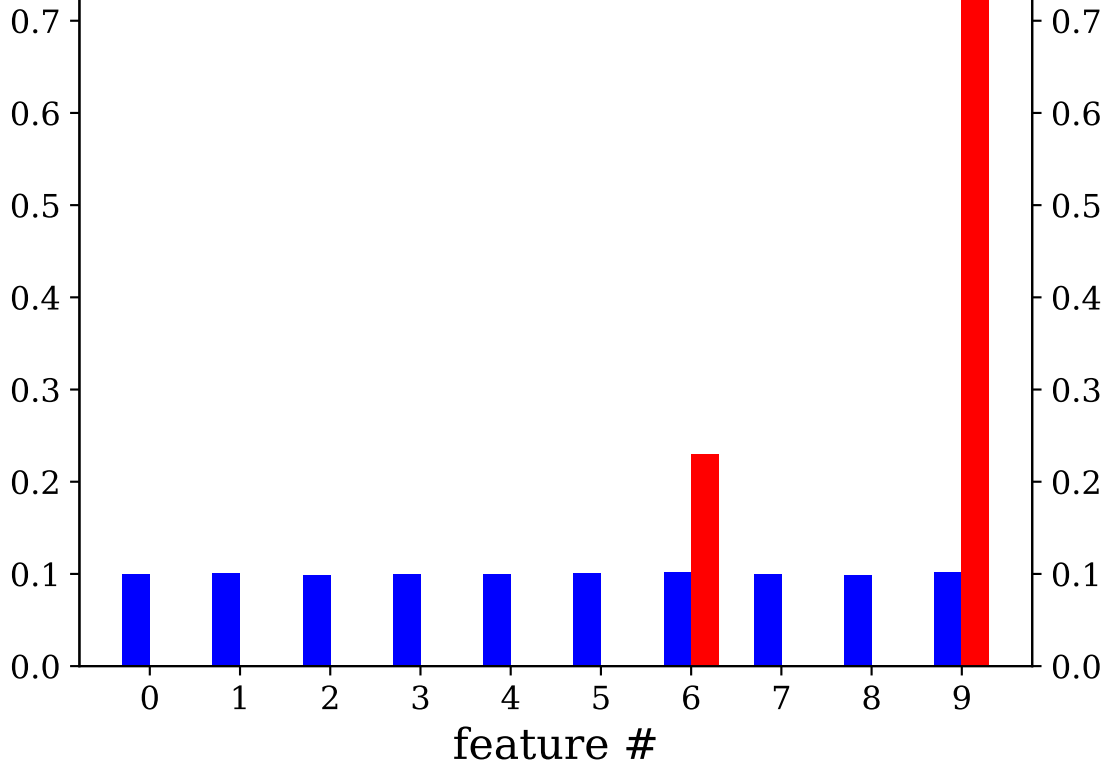

Supplement: supplementary_material [file attachment]

Average User weight

Fraction of Producers

0.5  
0.4  
0.3  
0.2  
0.1  
0.0

0.5  
0.4  
0.3  
0.2  
0.1  
0.0

0 1 2 3 4 5 6 7 8 9 10 11 12 13 14

feature #

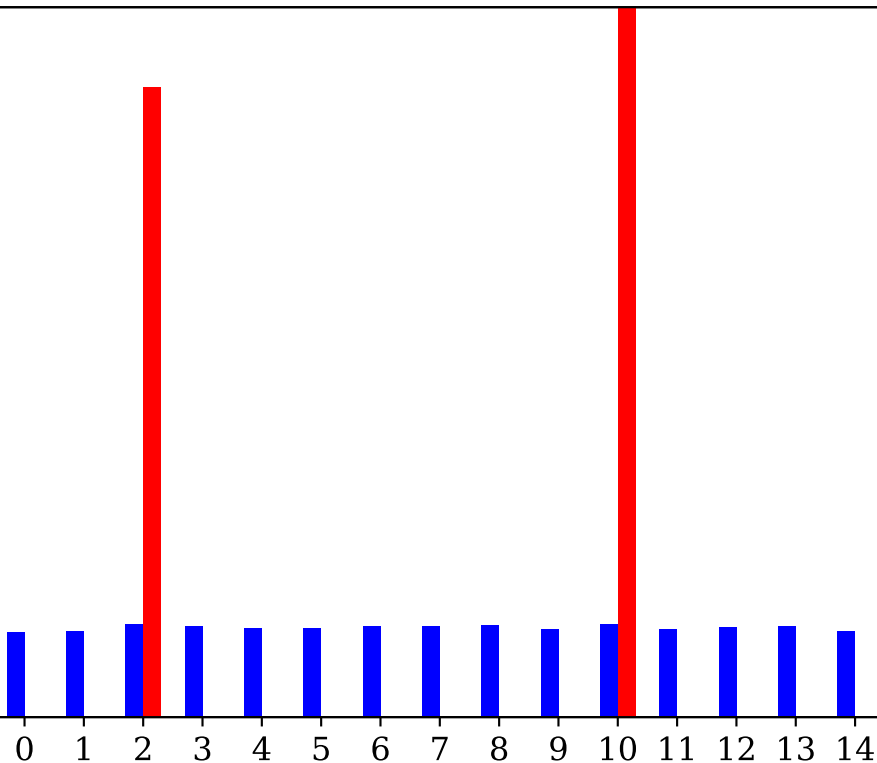

Supplement: supplementary_material [file attachment]

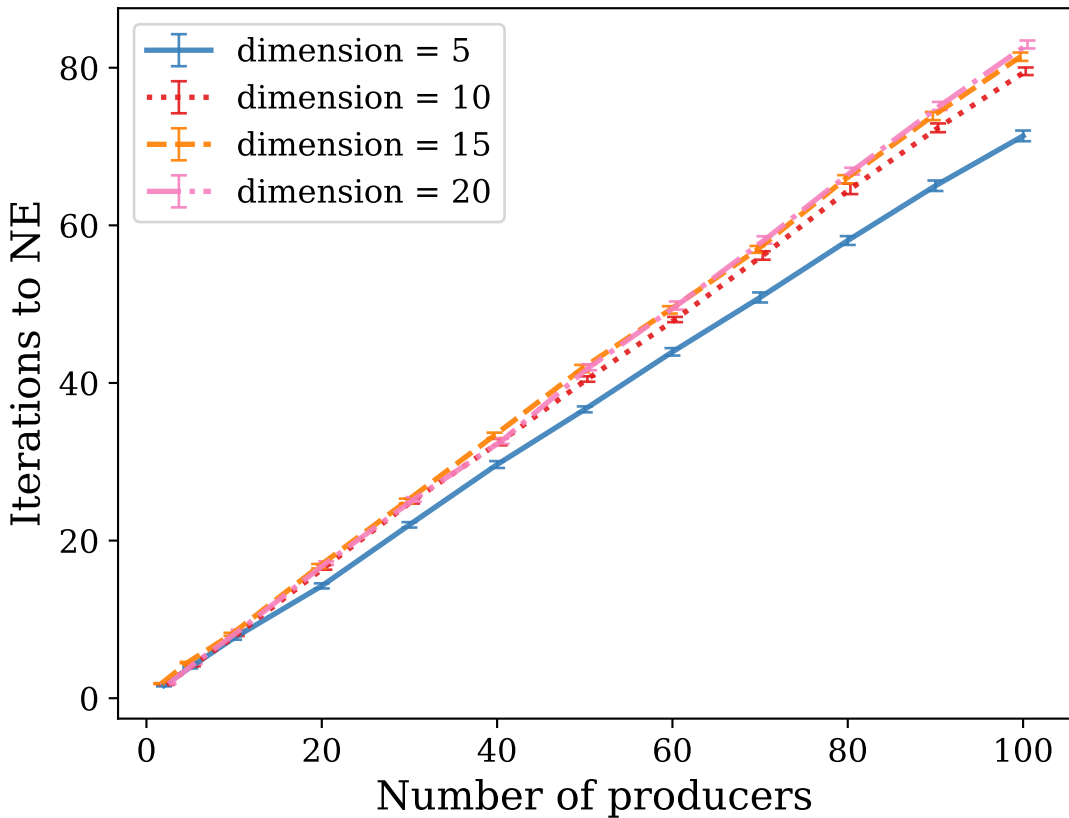

Supplement: supplementary_material [file attachment]

Average User weight

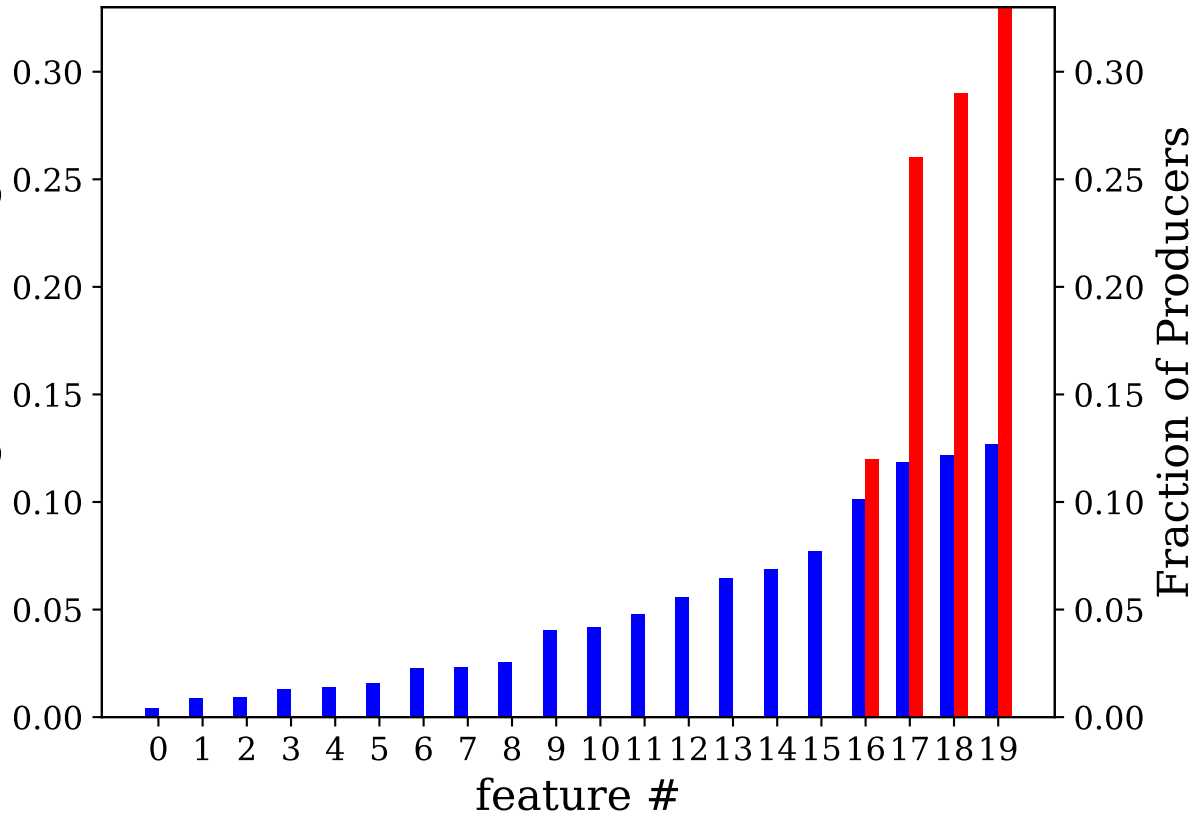

Supplement: supplementary_material [file attachment]

Average User weight

Fraction of Producers

0.12  
0.10  
0.08  
0.06  
0.04  
0.02  
0.00

0.12  
0.10  
0.08  
0.06  
0.04  
0.02  
0.00

0

1

2

3

4

5

6

7

8

9

feature #

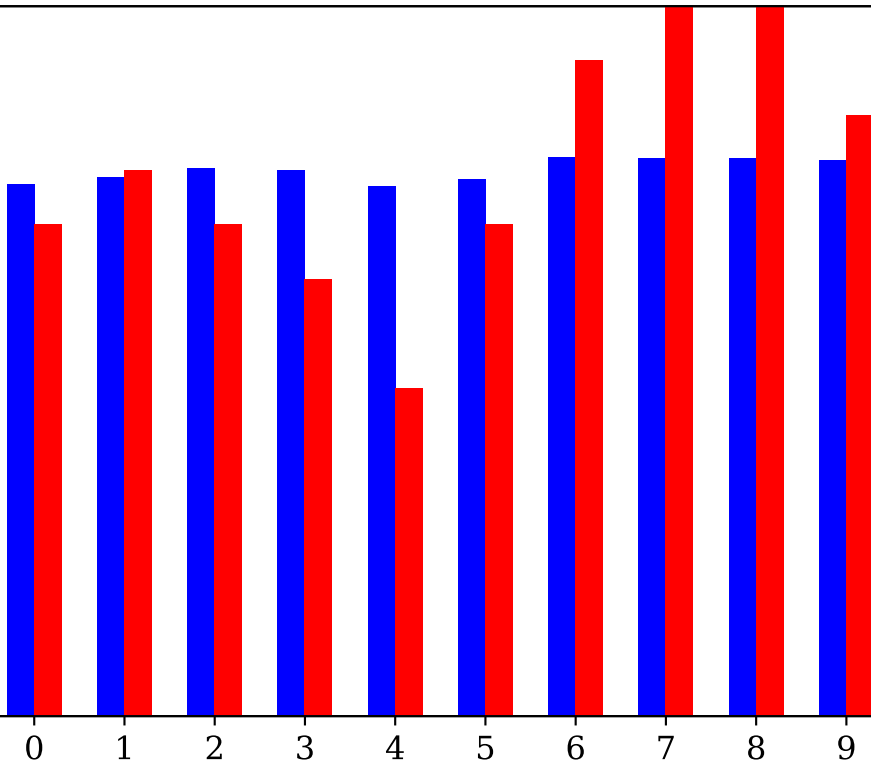

Supplement: supplementary_material [file attachment]

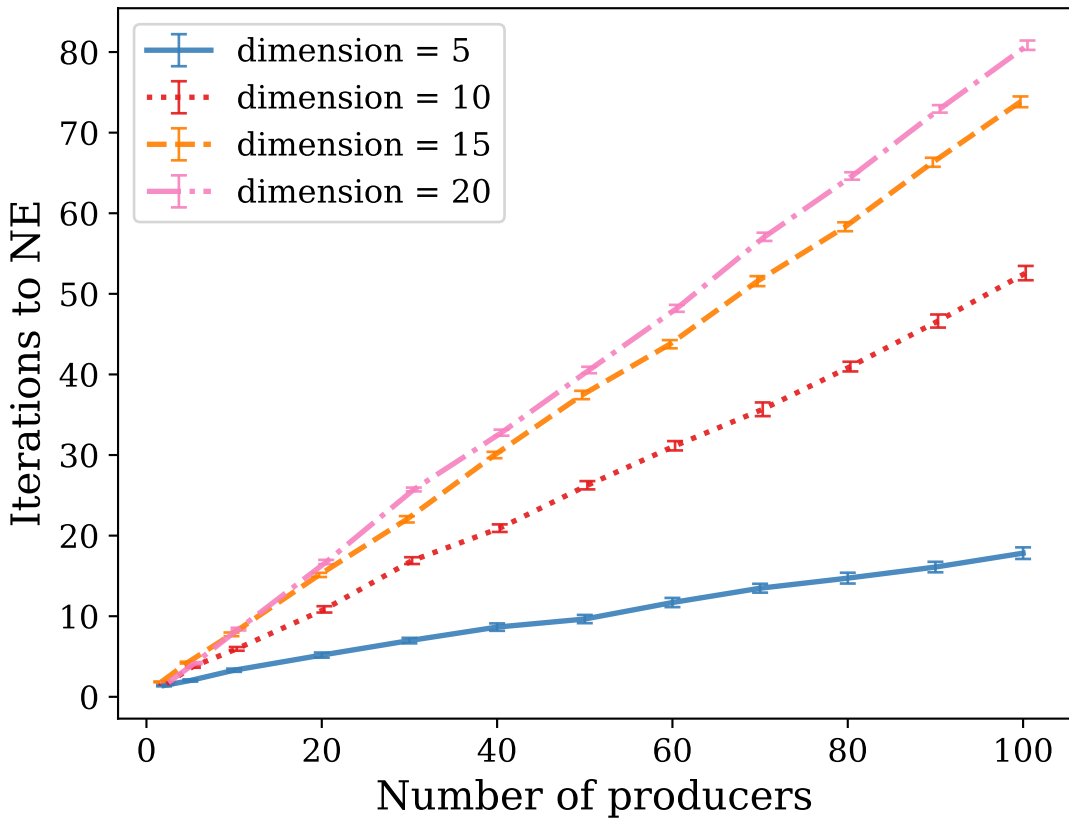

Supplement: supplementary_material [file attachment]

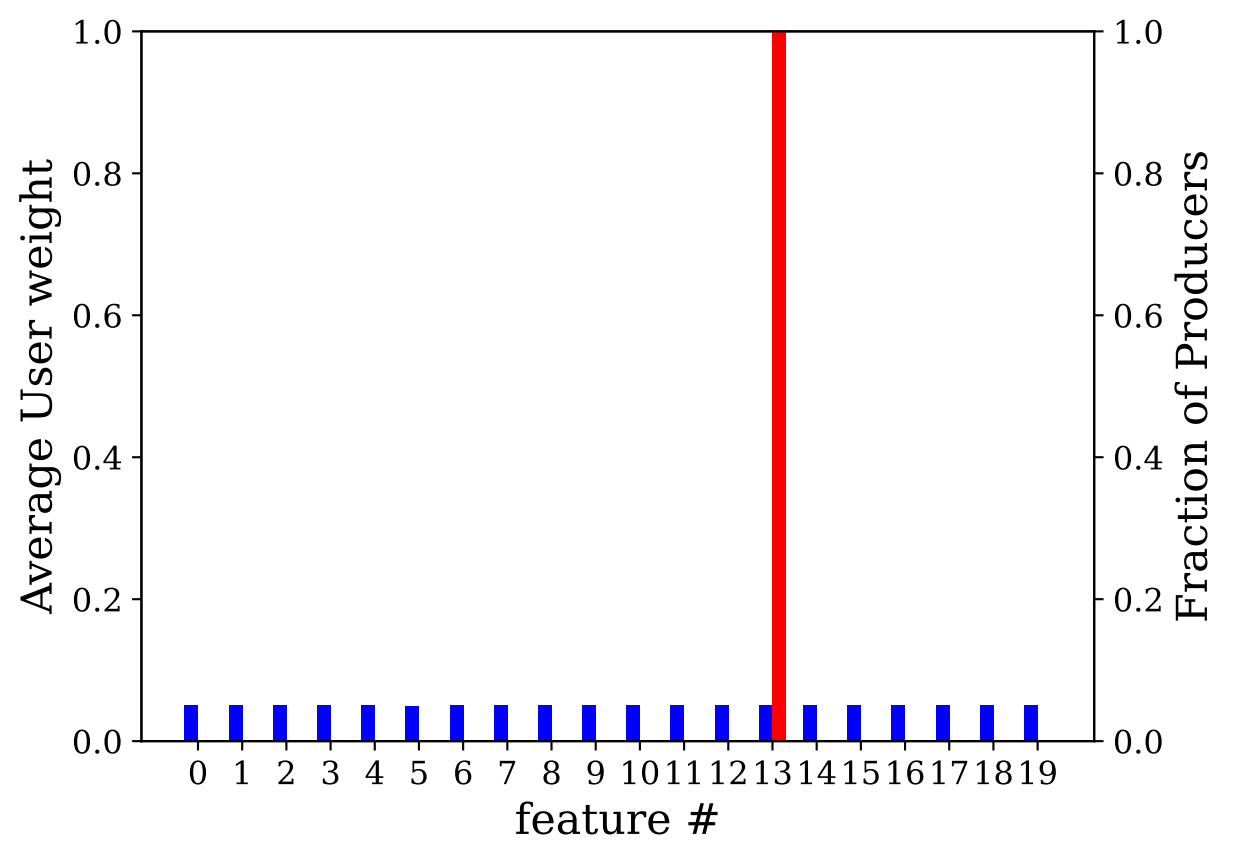

Supplement: supplementary_material [file attachment]

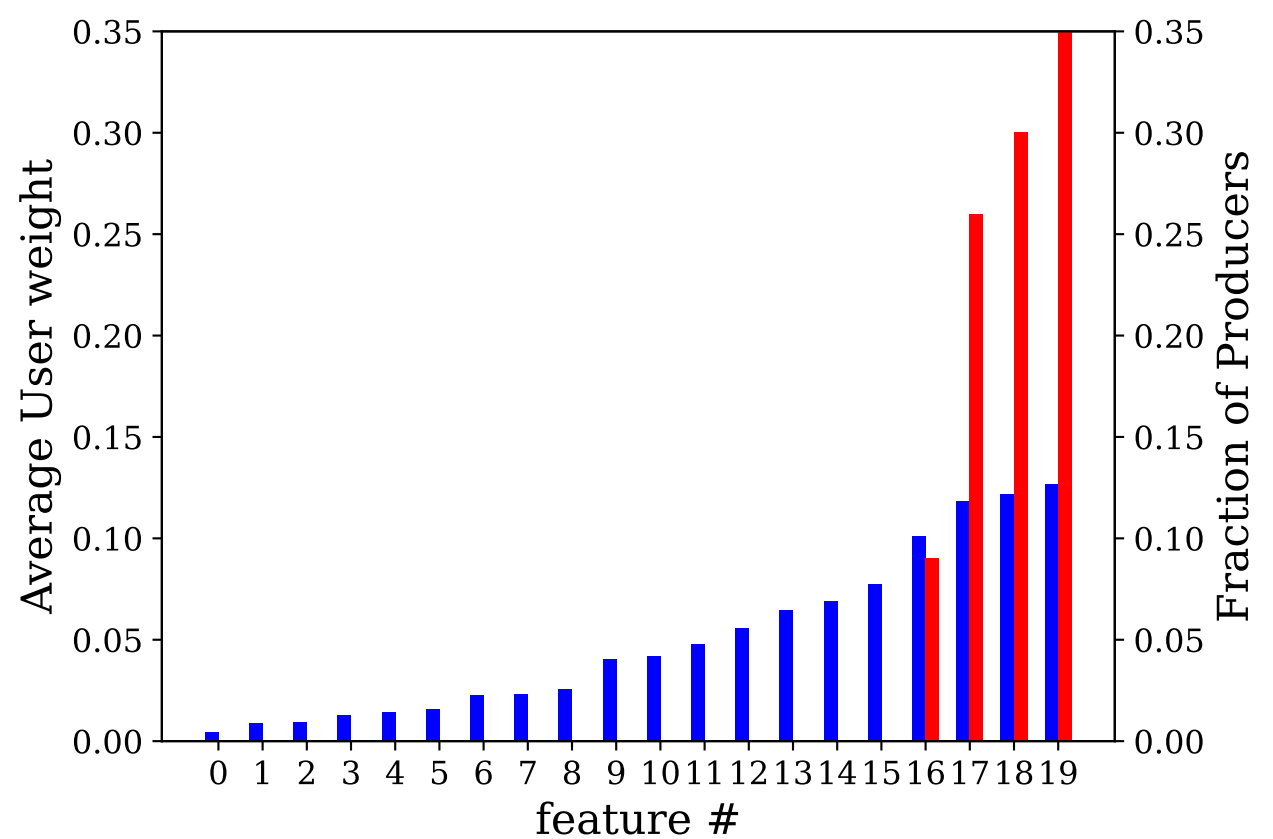

Supplement: supplementary_material [file attachment]

Average User weight

Fraction of Producers

0.35  
0.30  
0.25  
0.20  
0.15  
0.10  
0.05  
0.00

0.35  
0.30  
0.25  
0.20  
0.15  
0.10  
0.05  
0.00

0

1

2

3

4

5

6

7

8

9

feature #

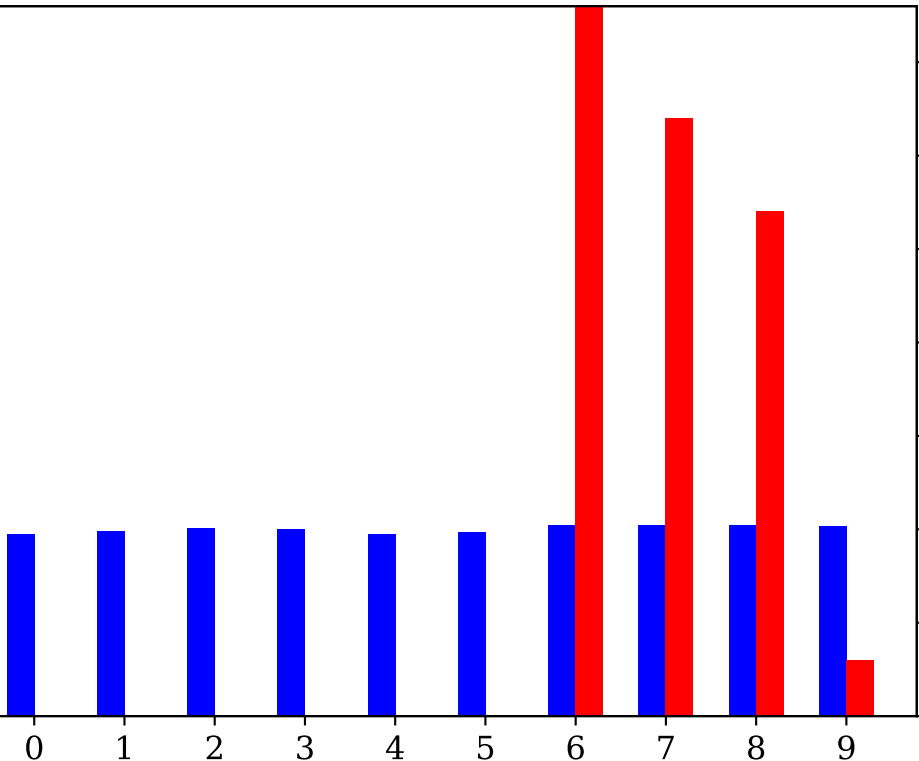

Supplement: supplementary_material [file attachment]

Average User weight

Fraction of Producers

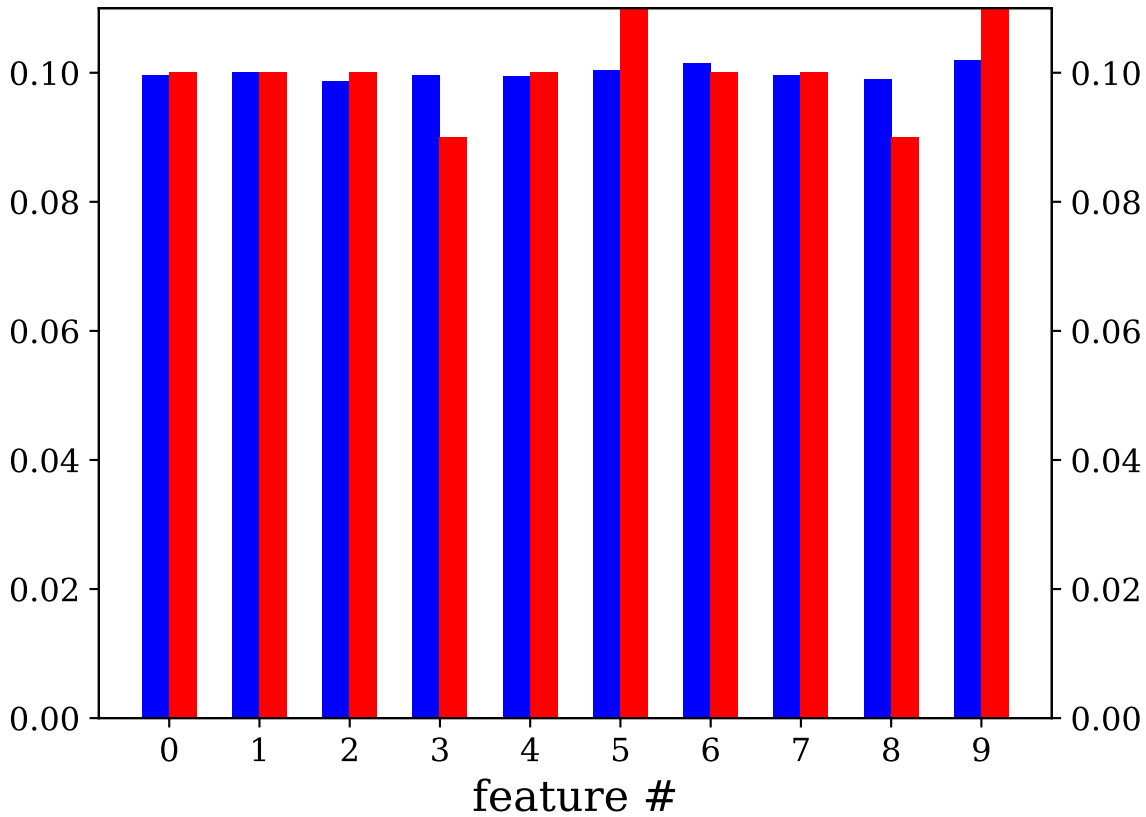

Supplement: supplementary_material [file attachment]



Supplement: supplementary_material [file attachment]

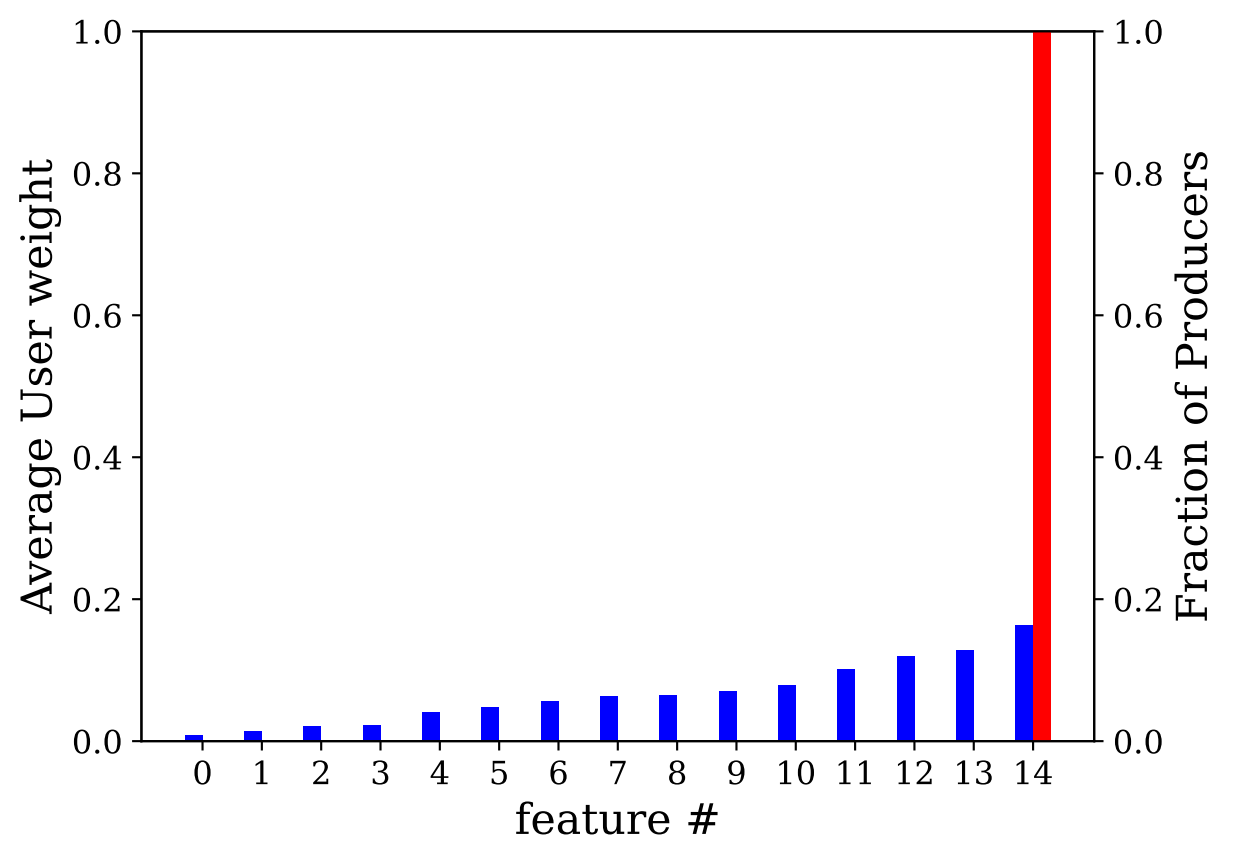

Supplement: supplementary_material [file attachment]

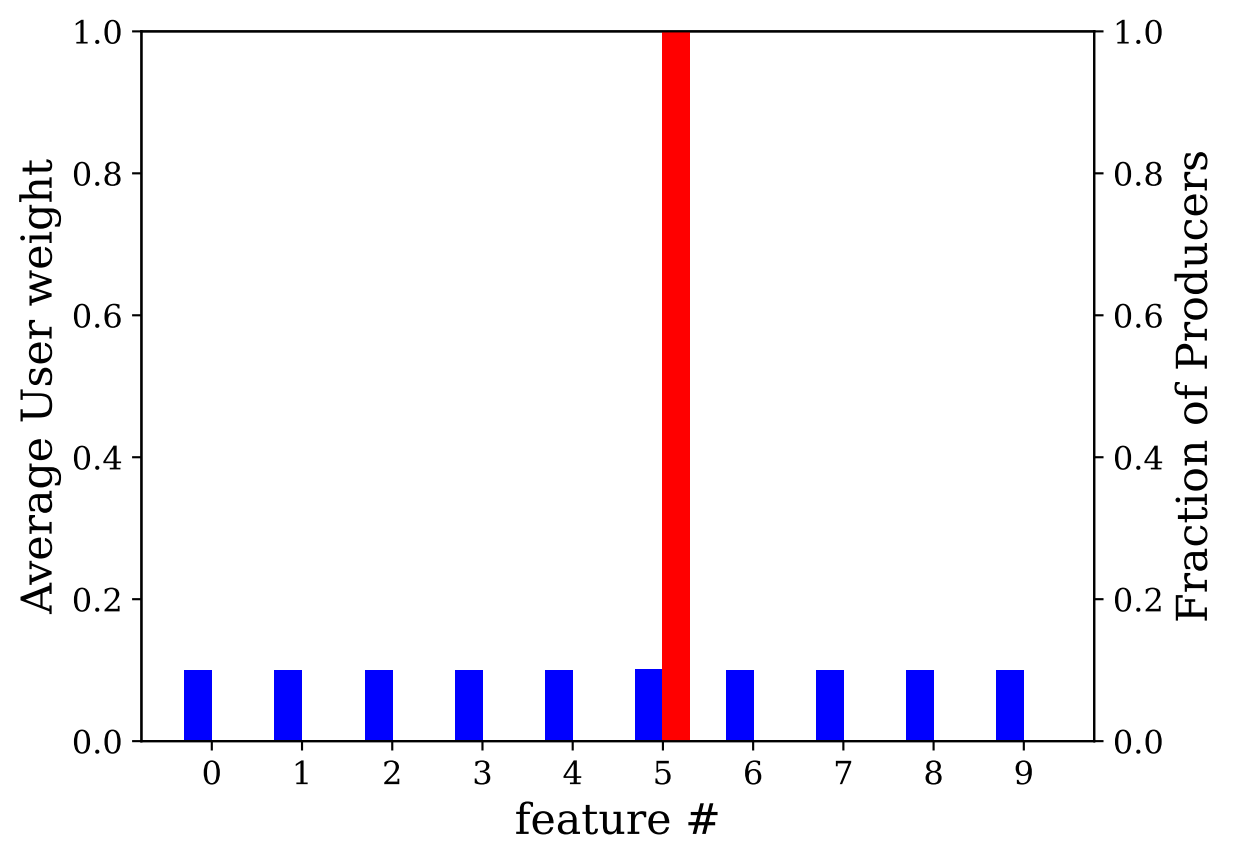

Supplement: supplementary_material [file attachment]

Average User weight

Fraction of Producers

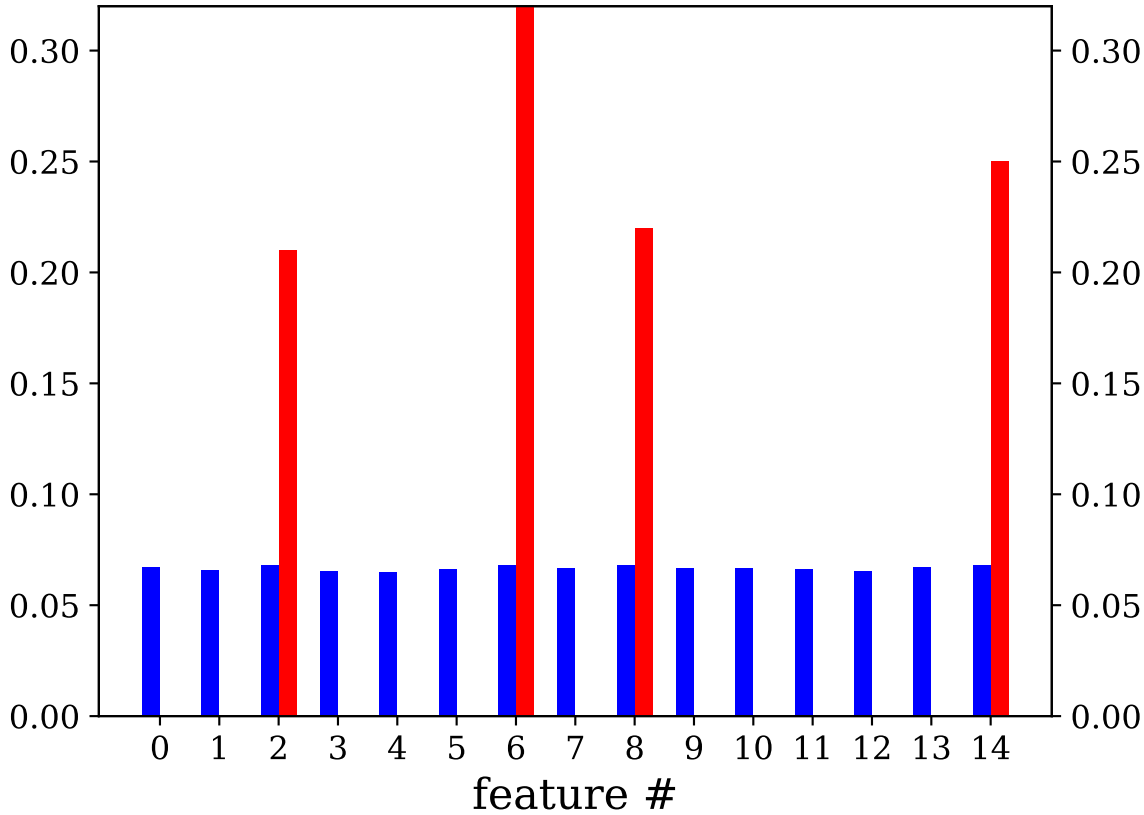

Supplement: supplementary_material [file attachment]

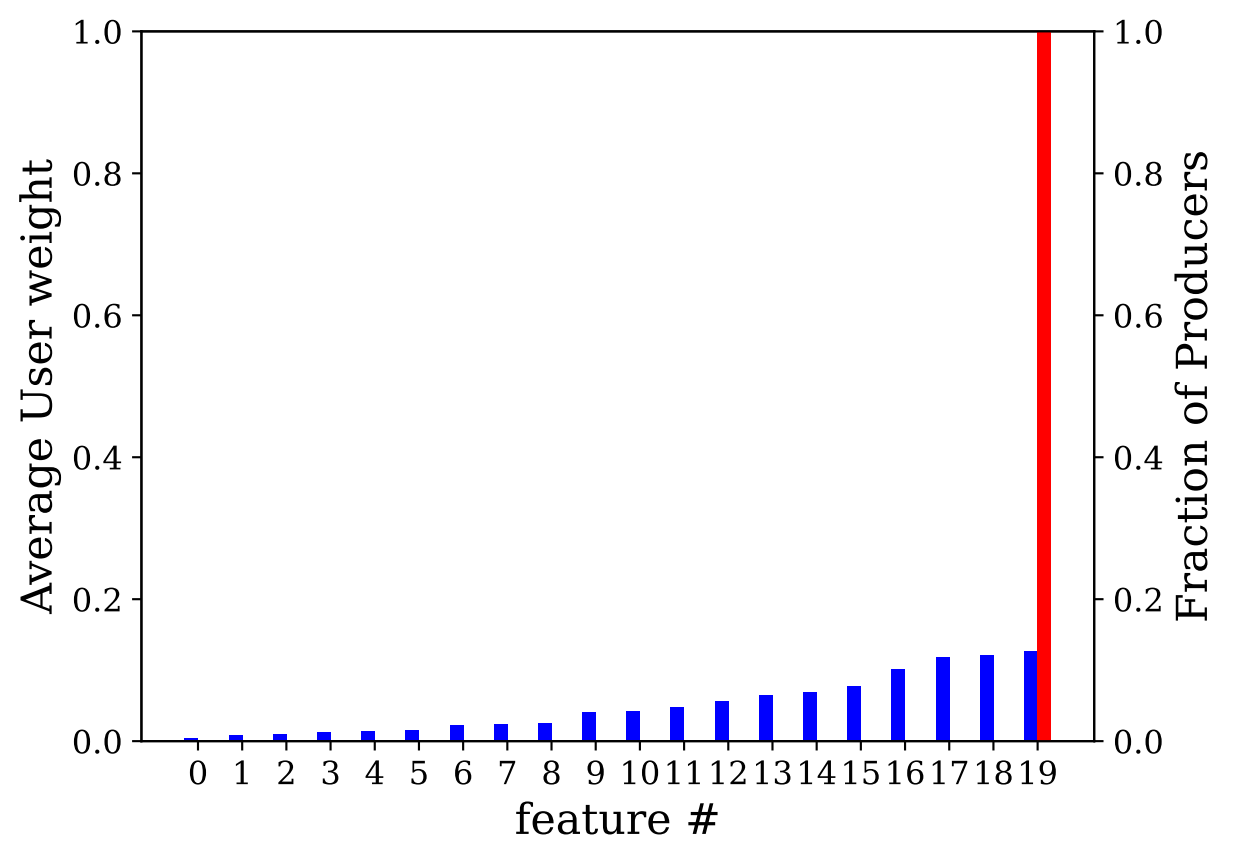

Supplement: supplementary_material [file attachment]



Supplement: supplementary_material [file attachment]

Average User weight

Fraction of Producers

0.40  
0.35  
0.30  
0.25  
0.20  
0.15  
0.10  
0.05  
0.00

0.40  
0.35  
0.30  
0.25  
0.20  
0.15  
0.10  
0.05  
0.00

0

1

2

3

4

5

6

7

8

9

feature #

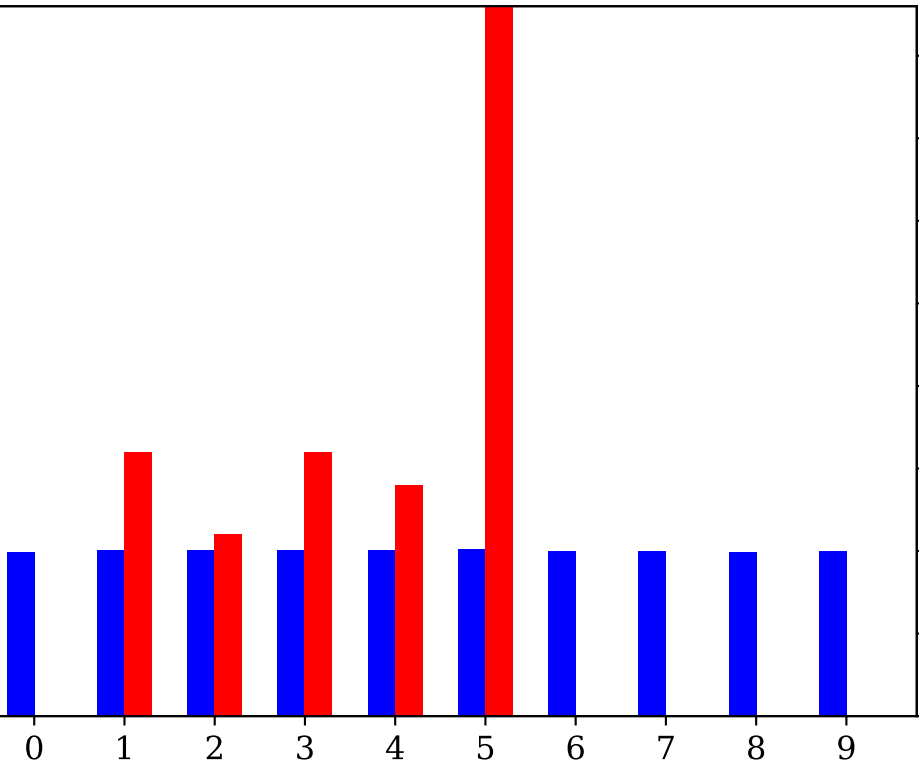

Supplement: supplementary_material [file attachment]

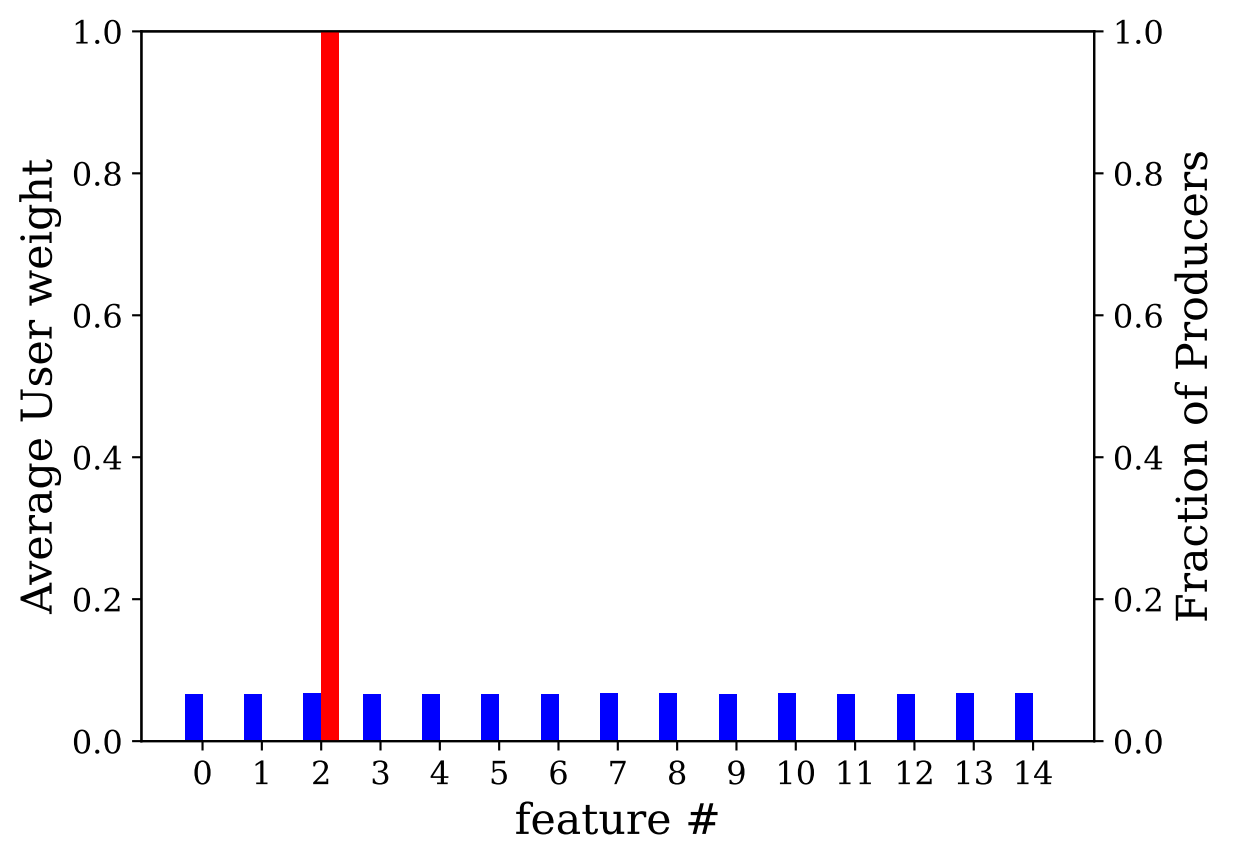

Supplement: supplementary_material [file attachment]

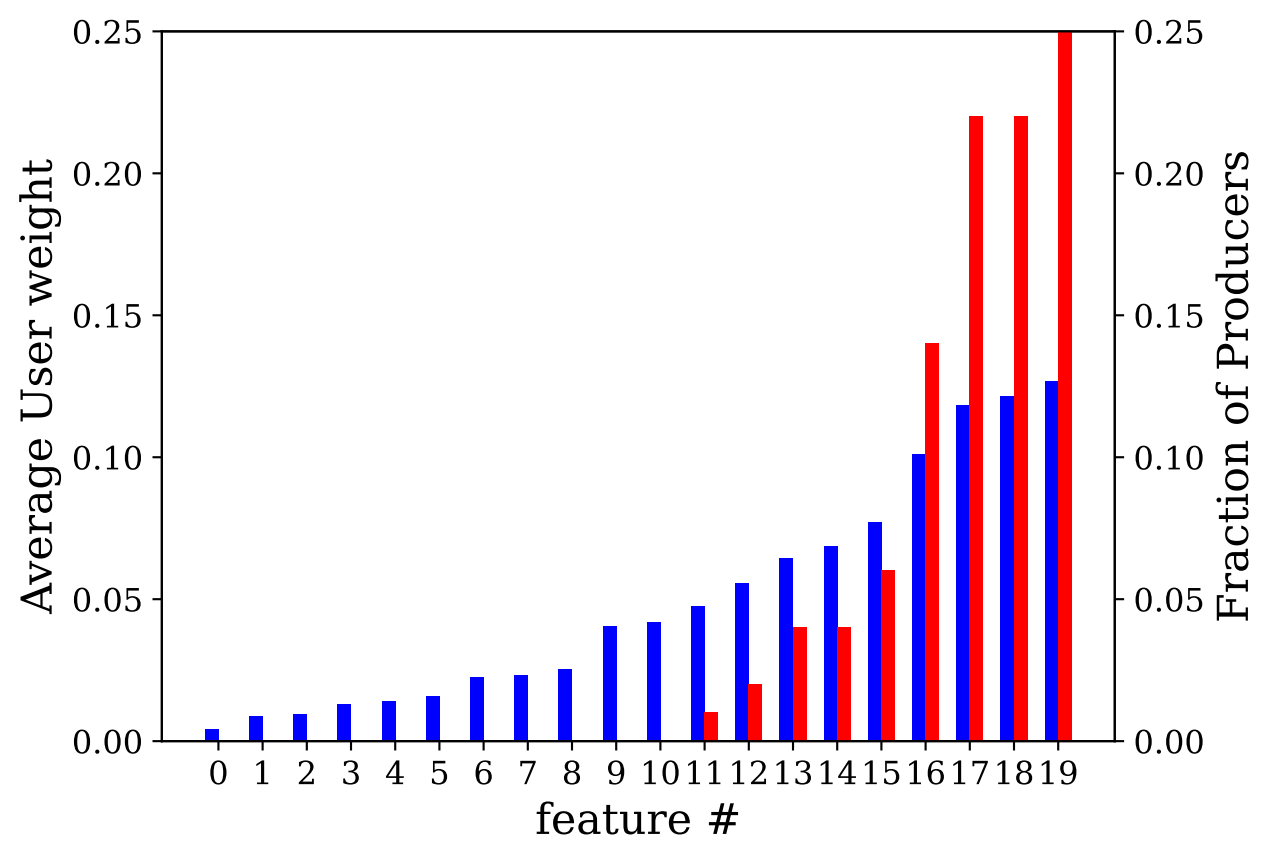

Supplement: supplementary_material [file attachment]

Average User weight

0.200  
0.175  
0.150  
0.125  
0.100  
0.075  
0.050  
0.025  
0.000

0

1

2

3

4

feature #

Fraction of Producers

0.200  
0.175  
0.150  
0.125  
0.100  
0.075  
0.050  
0.025  
0.000

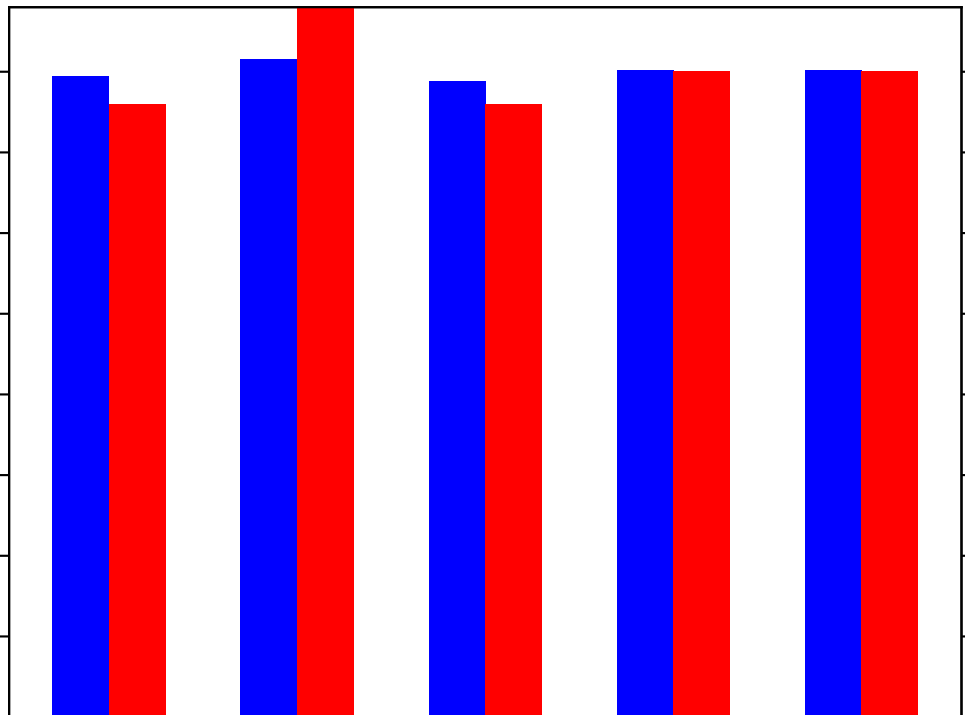

Supplement: supplementary_material [file attachment]

Average User weight

Fraction of Producers

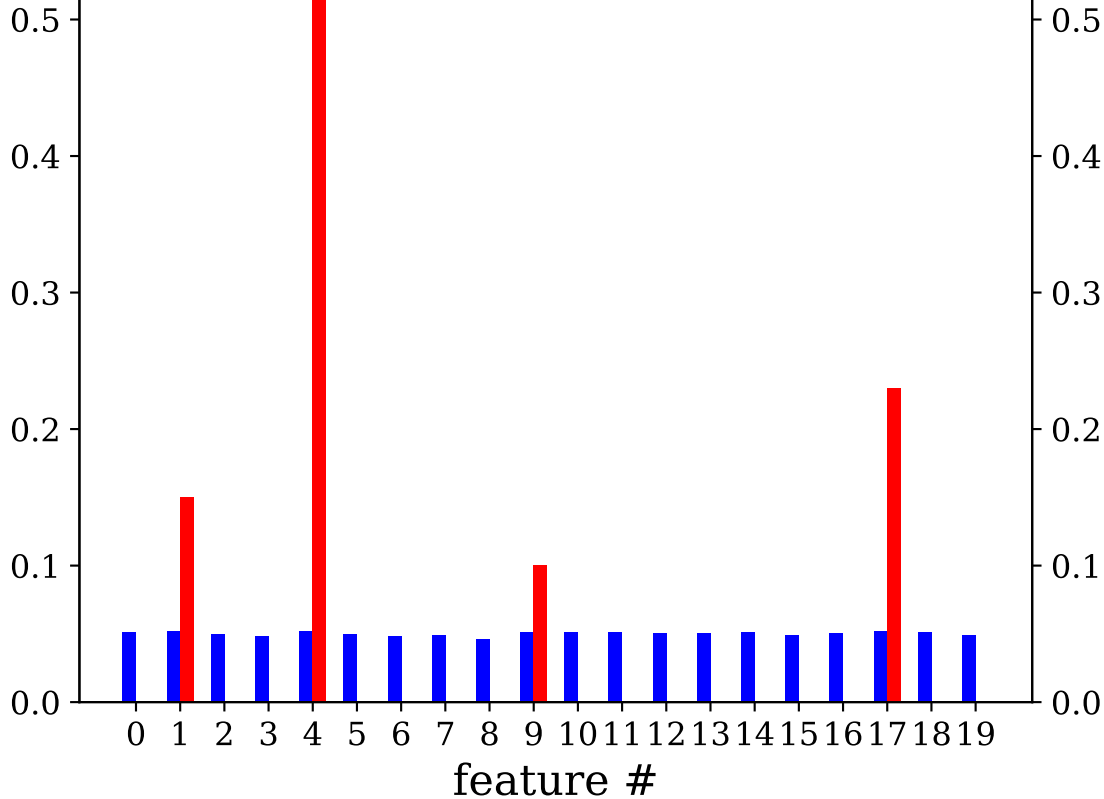

Supplement: supplementary_material [file attachment]

Average User weight

0.200  
0.175  
0.150  
0.125  
0.100  
0.075  
0.050  
0.025  
0.000

0

1

2

3

4

feature #

Fraction of Producers

0.200  
0.175  
0.150  
0.125  
0.100  
0.075  
0.050  
0.025  
0.000

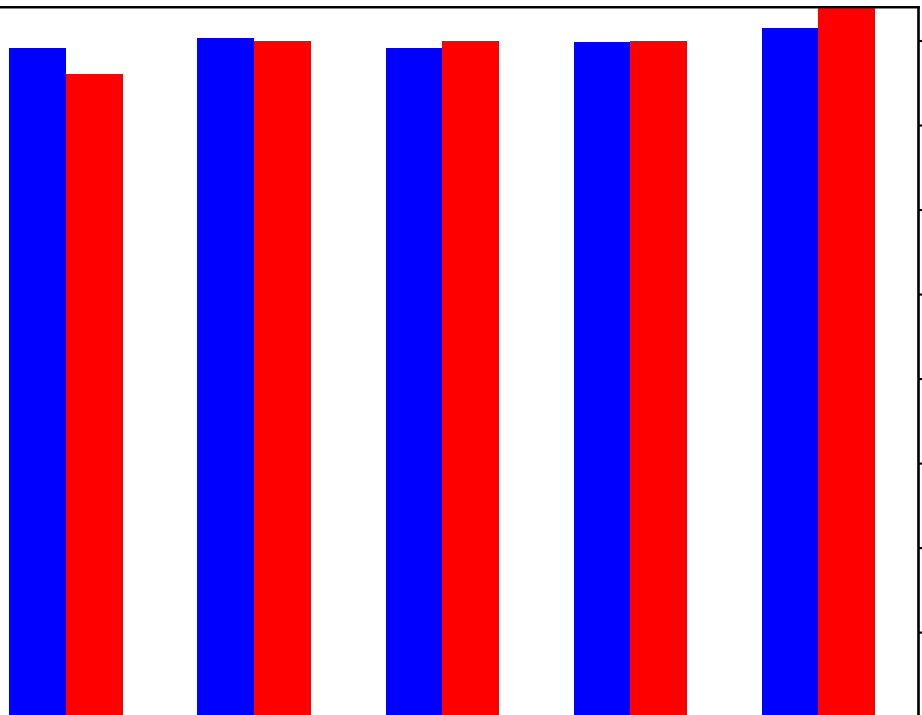

Supplement: supplementary_material [file attachment]

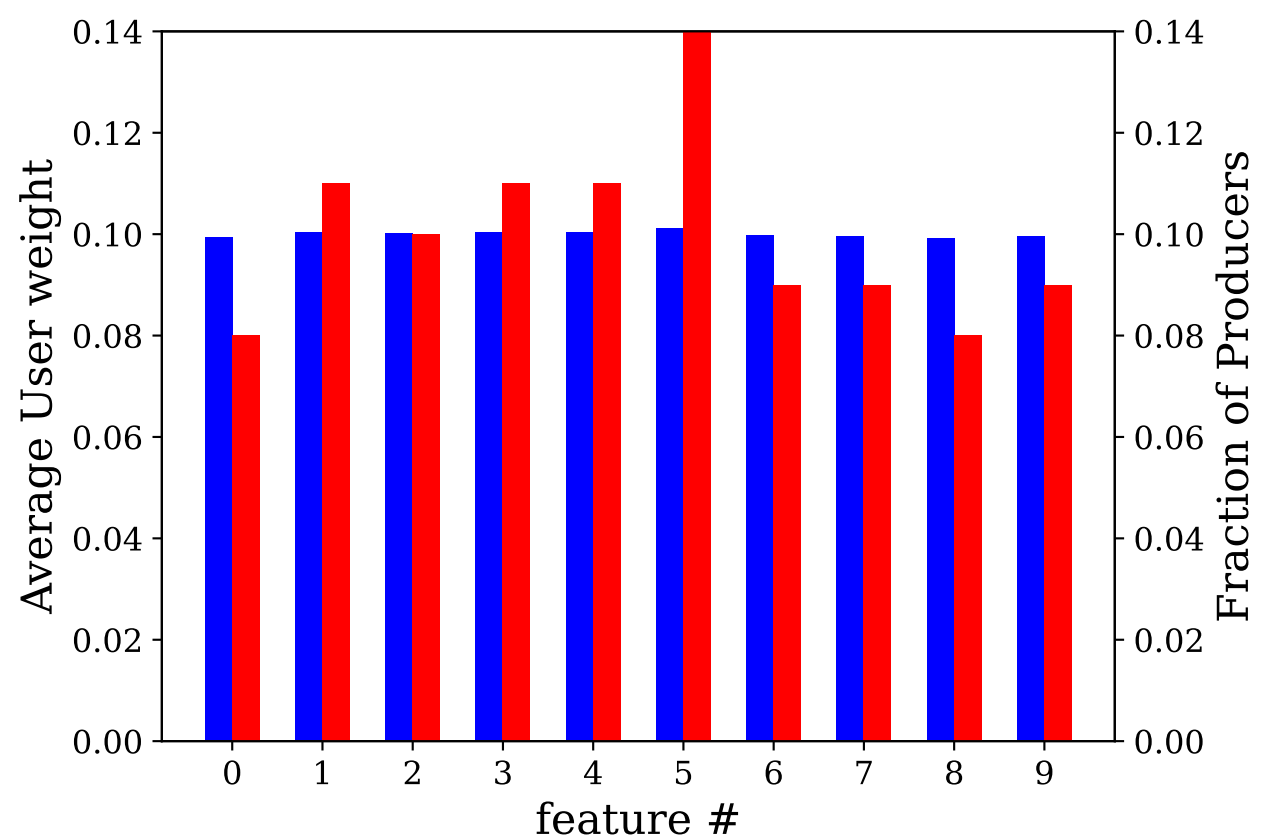

Supplement: supplementary_material [file attachment]

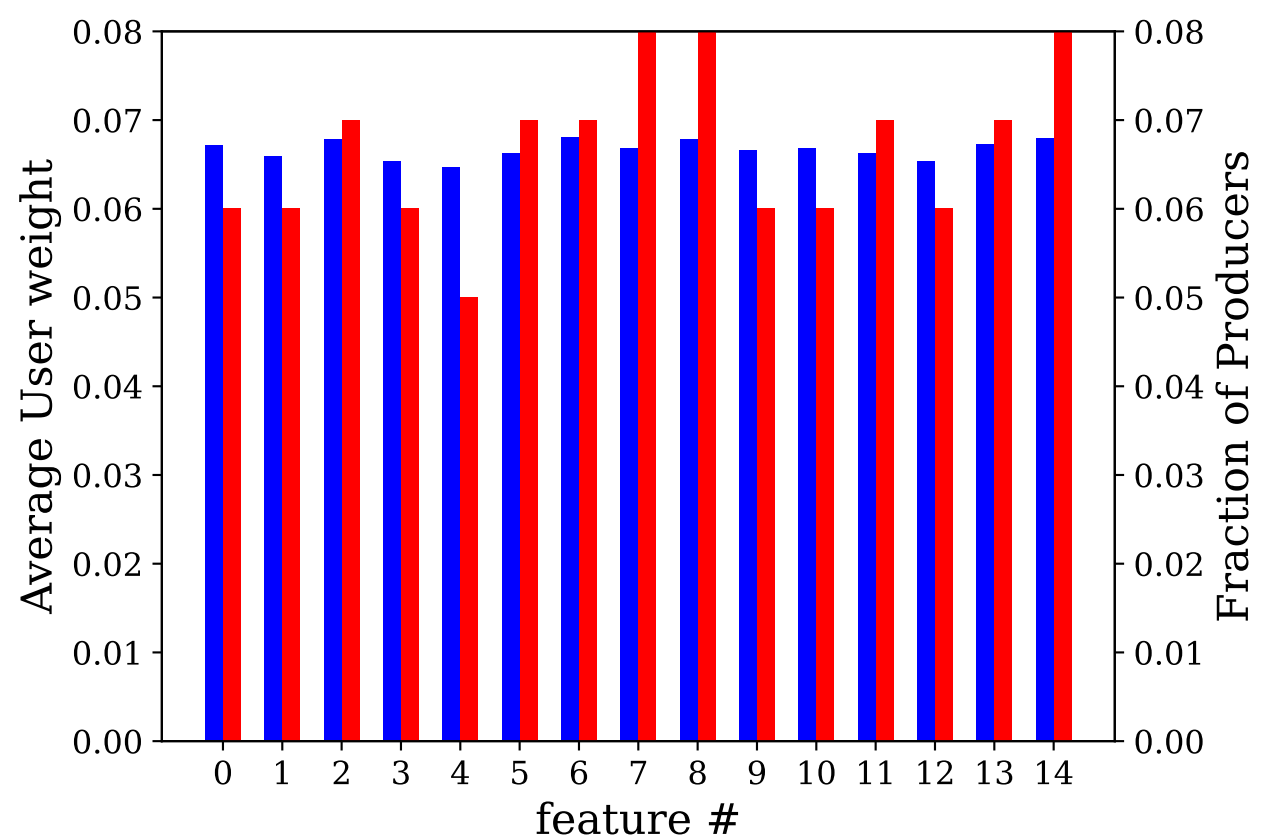

Supplement: supplementary_material [file attachment]

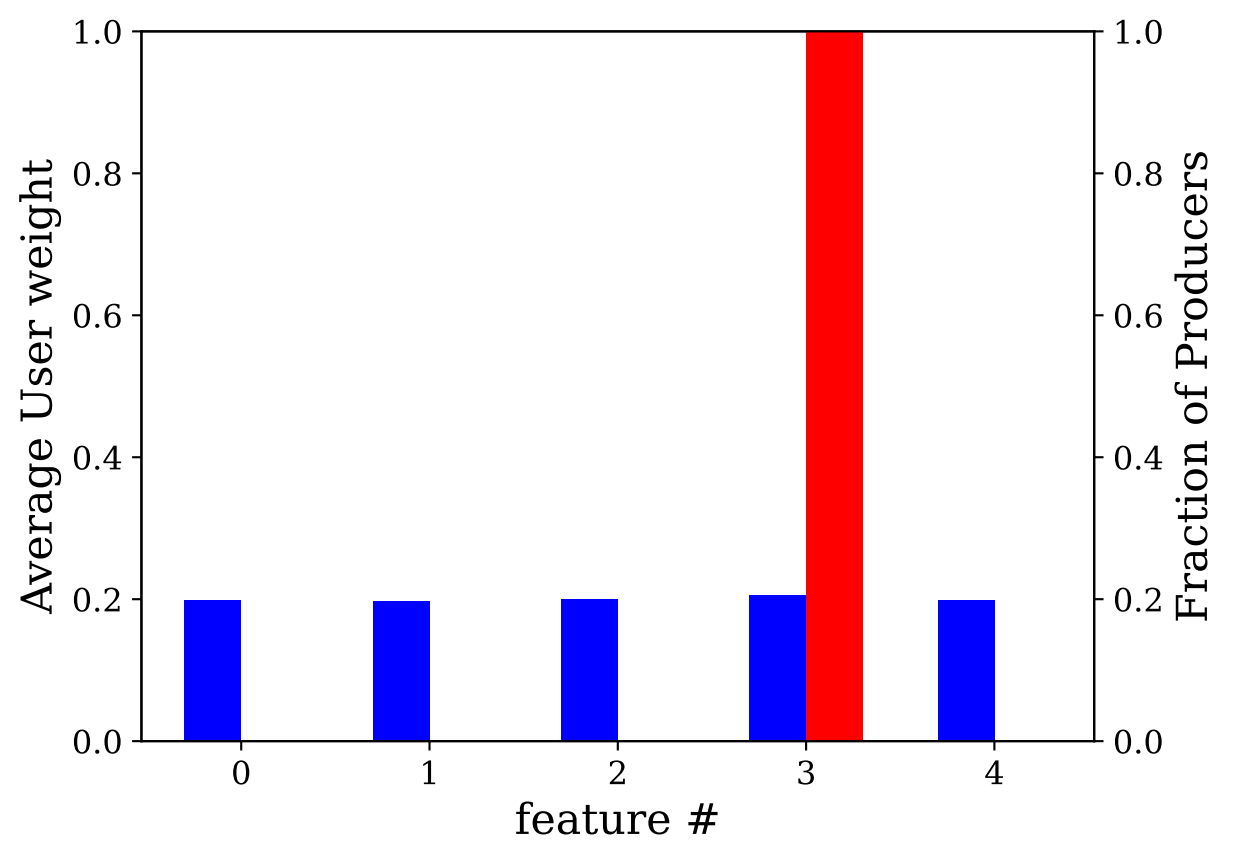

Supplement: supplementary_material [file attachment]

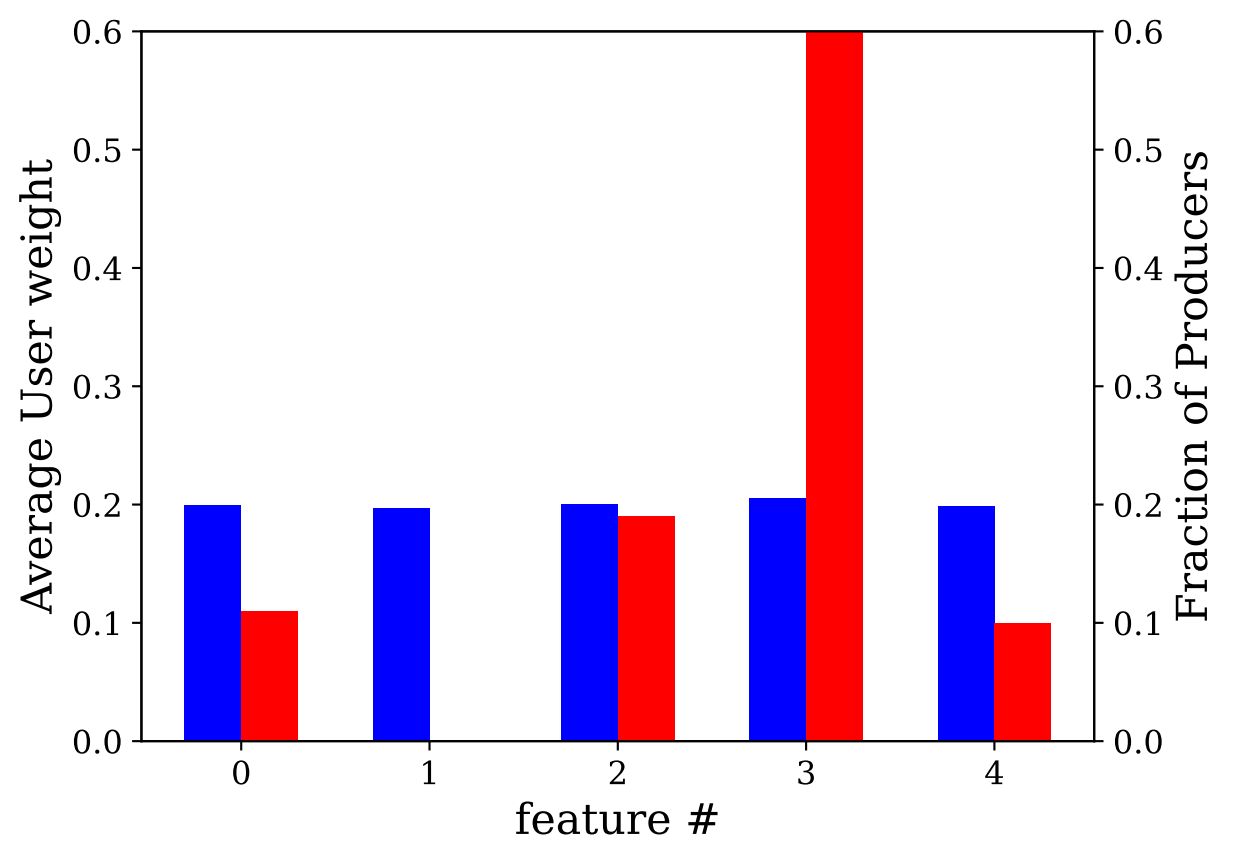

Supplement: supplementary_material [file attachment]

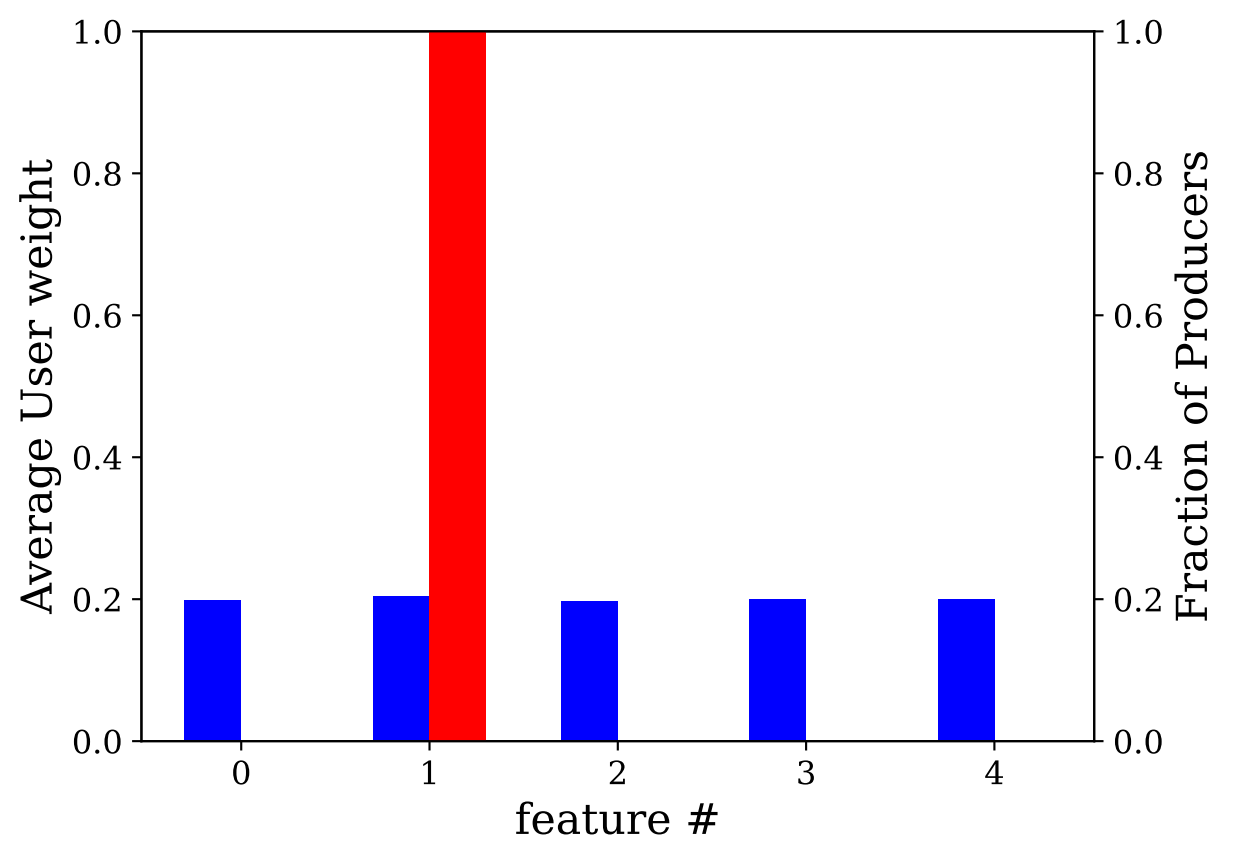

Supplement: supplementary_material [file attachment]

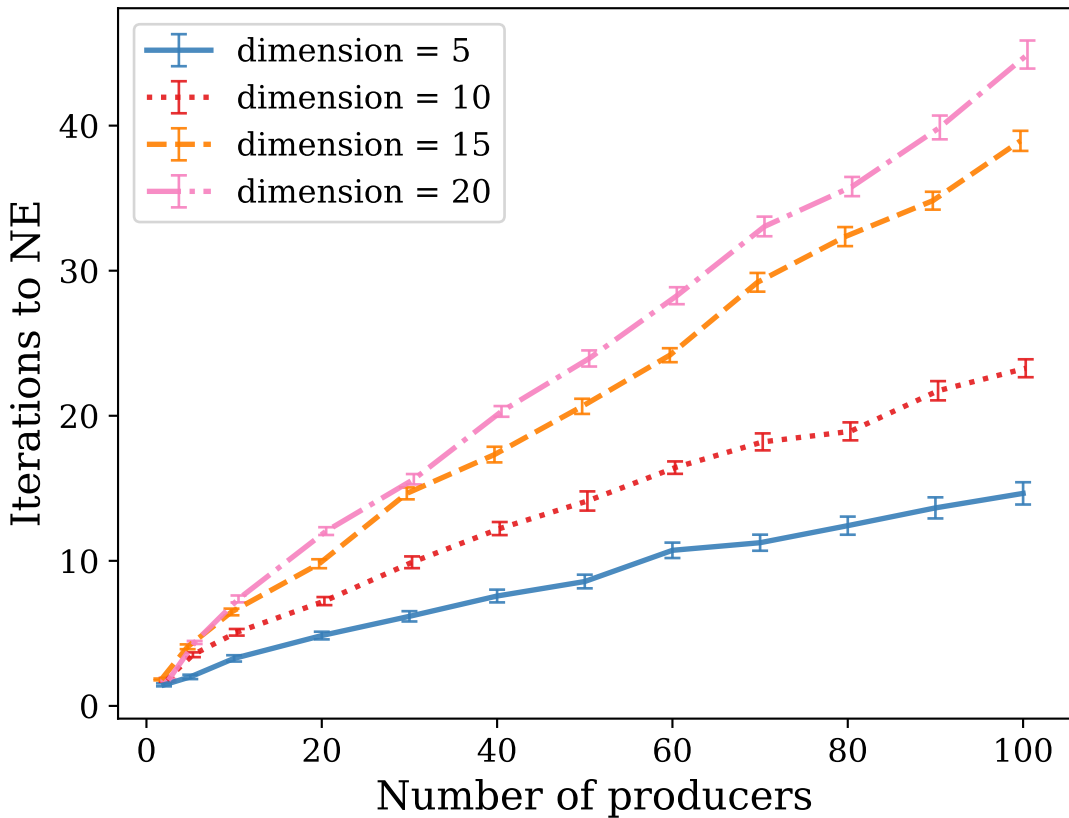

Supplement: supplementary_material [file attachment]

Average User weight

Fraction of Producers

0.12  
0.10  
0.08  
0.06  
0.04  
0.02  
0.00

0.12  
0.10  
0.08  
0.06  
0.04  
0.02  
0.00

0

1

2

3

4

5

6

7

8

9

feature #

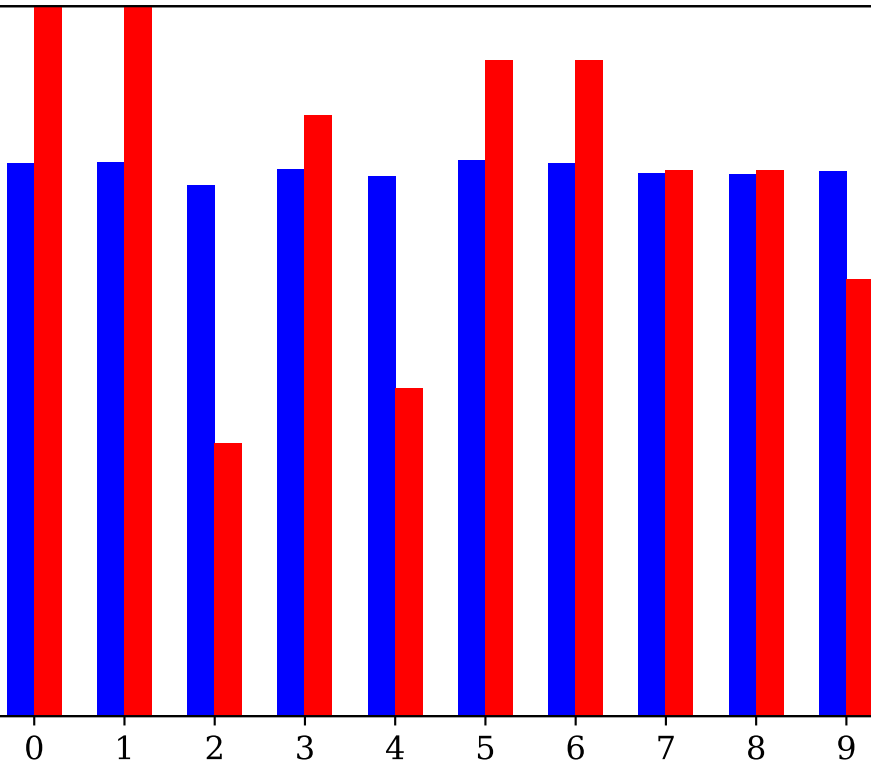

Supplement: supplementary_material [file attachment]

Average producer utility

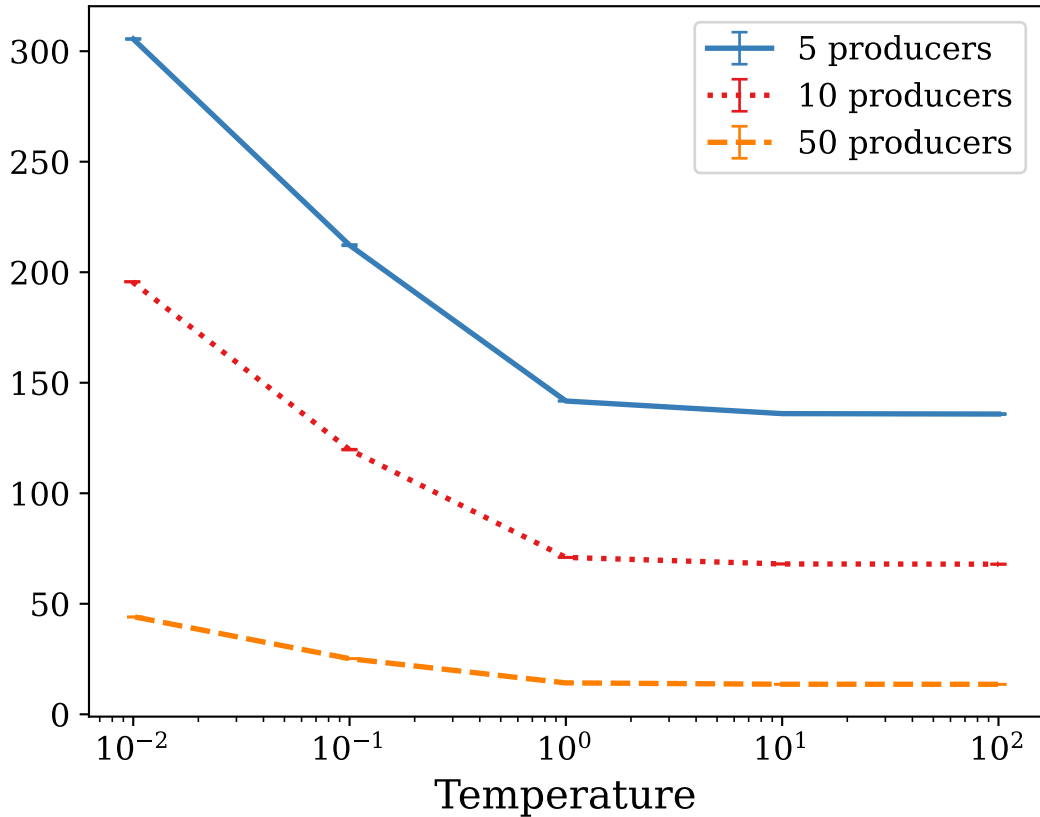

Supplement: supplementary_material [file attachment]

Average User weight

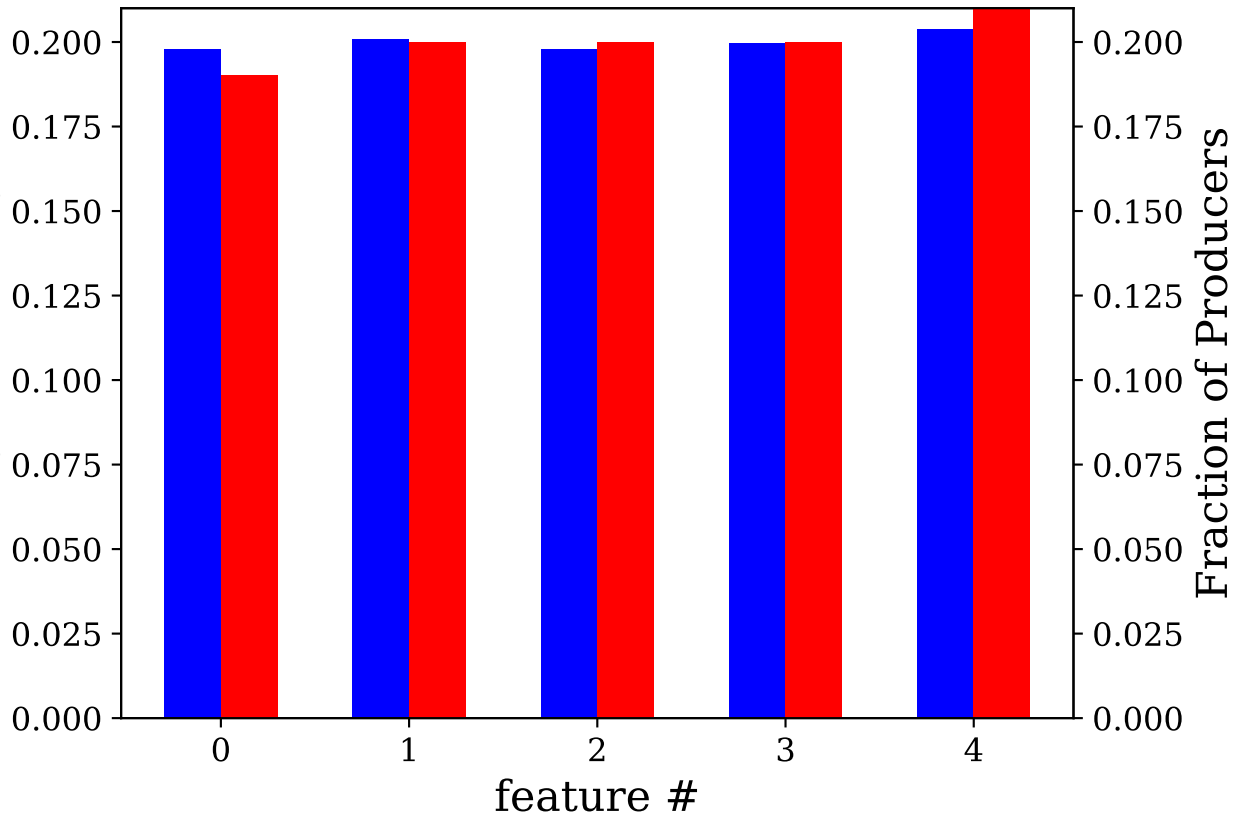

Supplement: supplementary_material [file attachment]

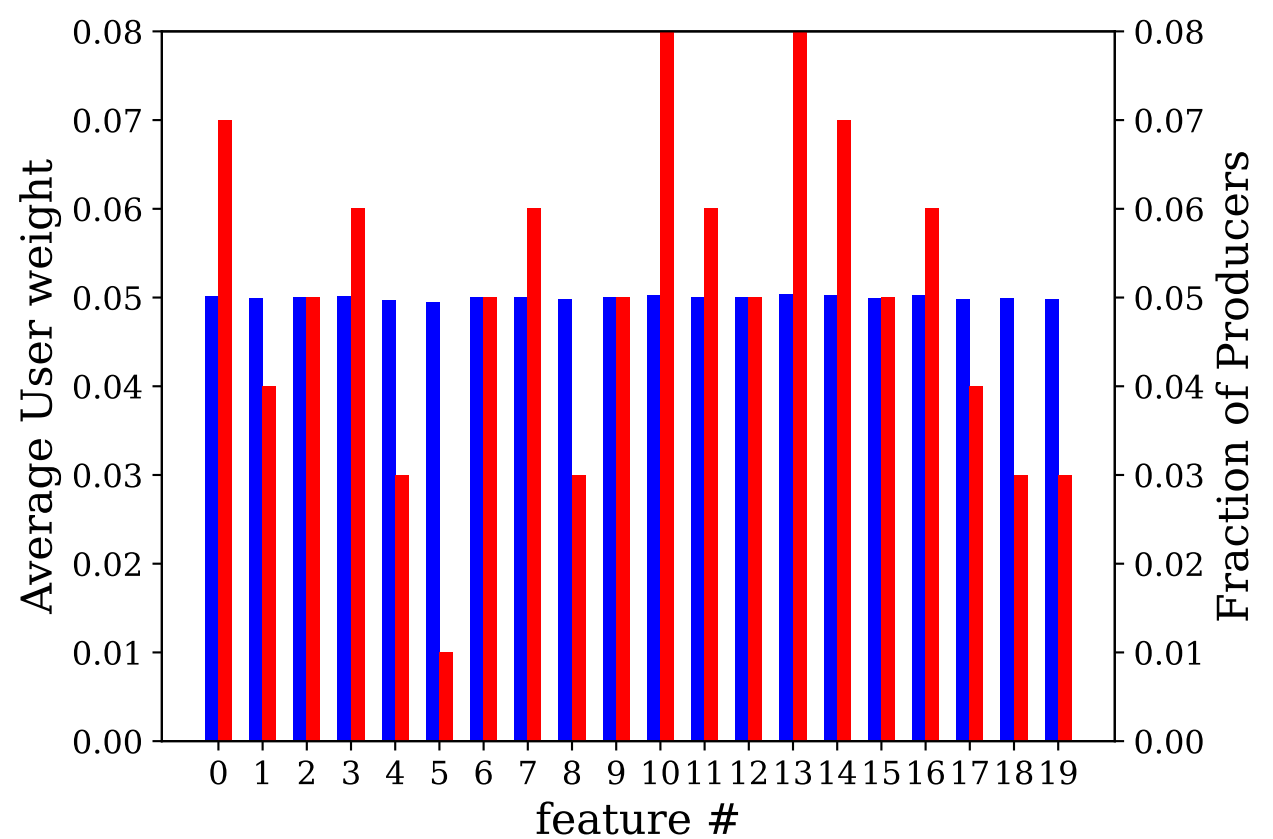

Supplement: supplementary_material [file attachment]

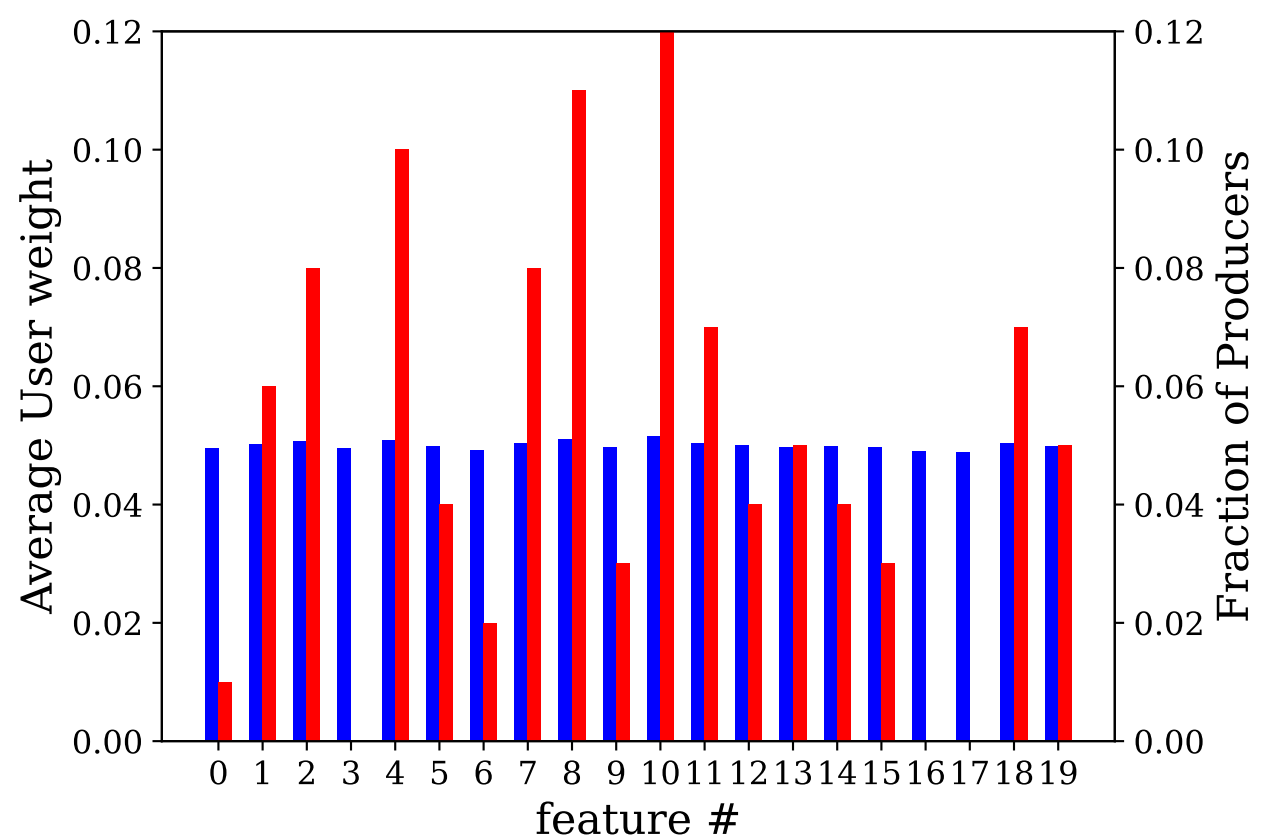

Supplement: supplementary_material [file attachment]

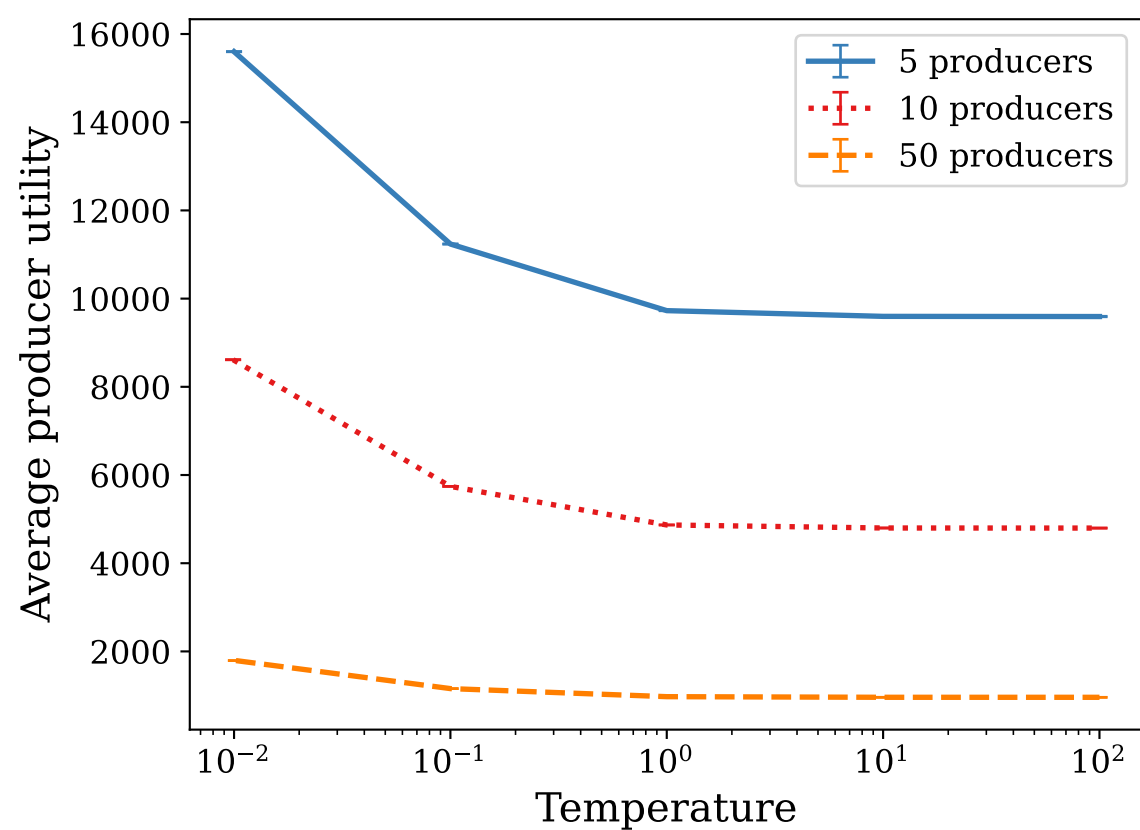

Supplement: supplementary_material [file attachment]

Average User weight

0.4  
0.3  
0.2  
0.1  
0.0

0

1

2

3

4

5

6

7

8

9

feature #

Fraction of Producers

0.4  
0.3  
0.2  
0.1  
0.0

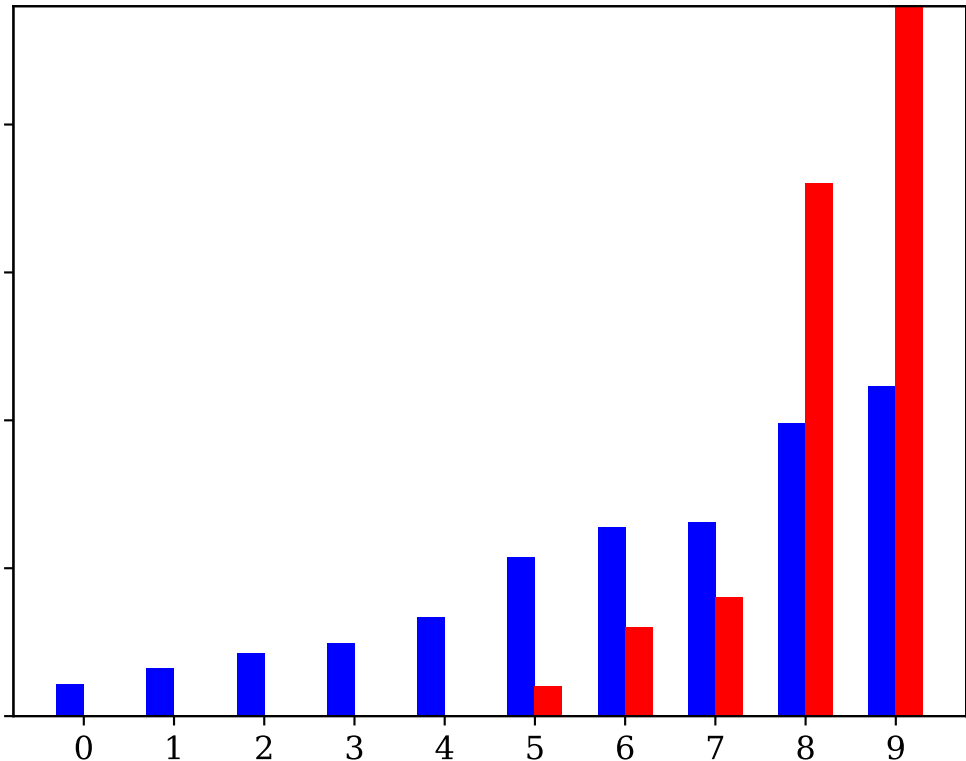

Supplement: supplementary_material [file attachment]

Average producer utility

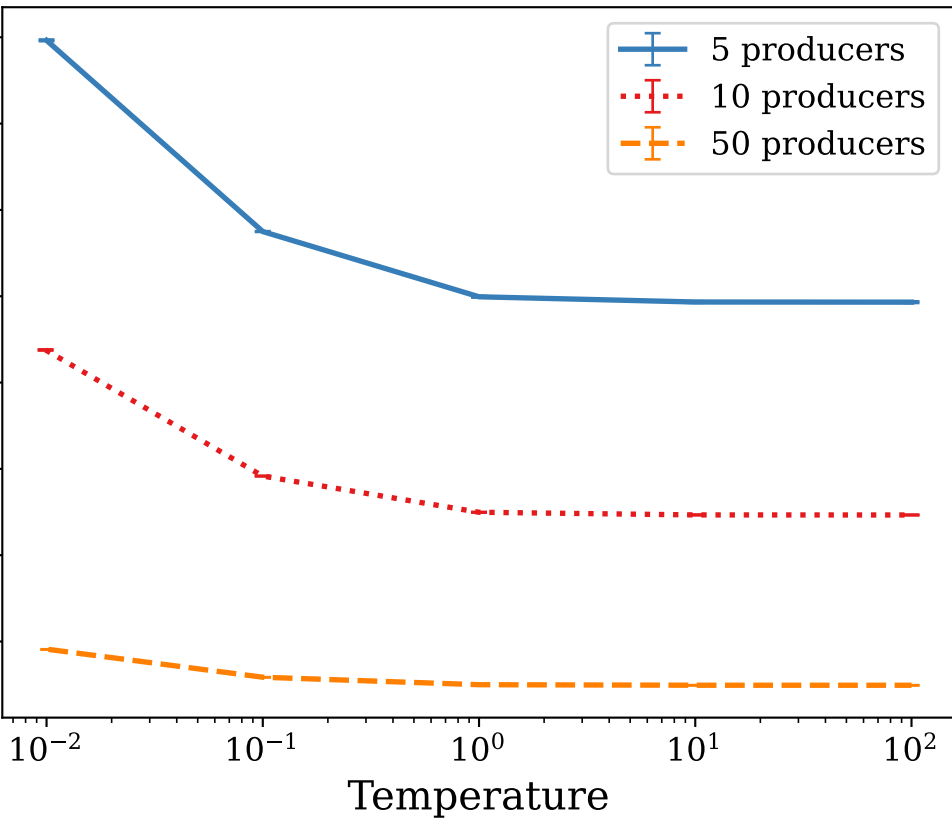

Supplement: supplementary_material [file attachment]

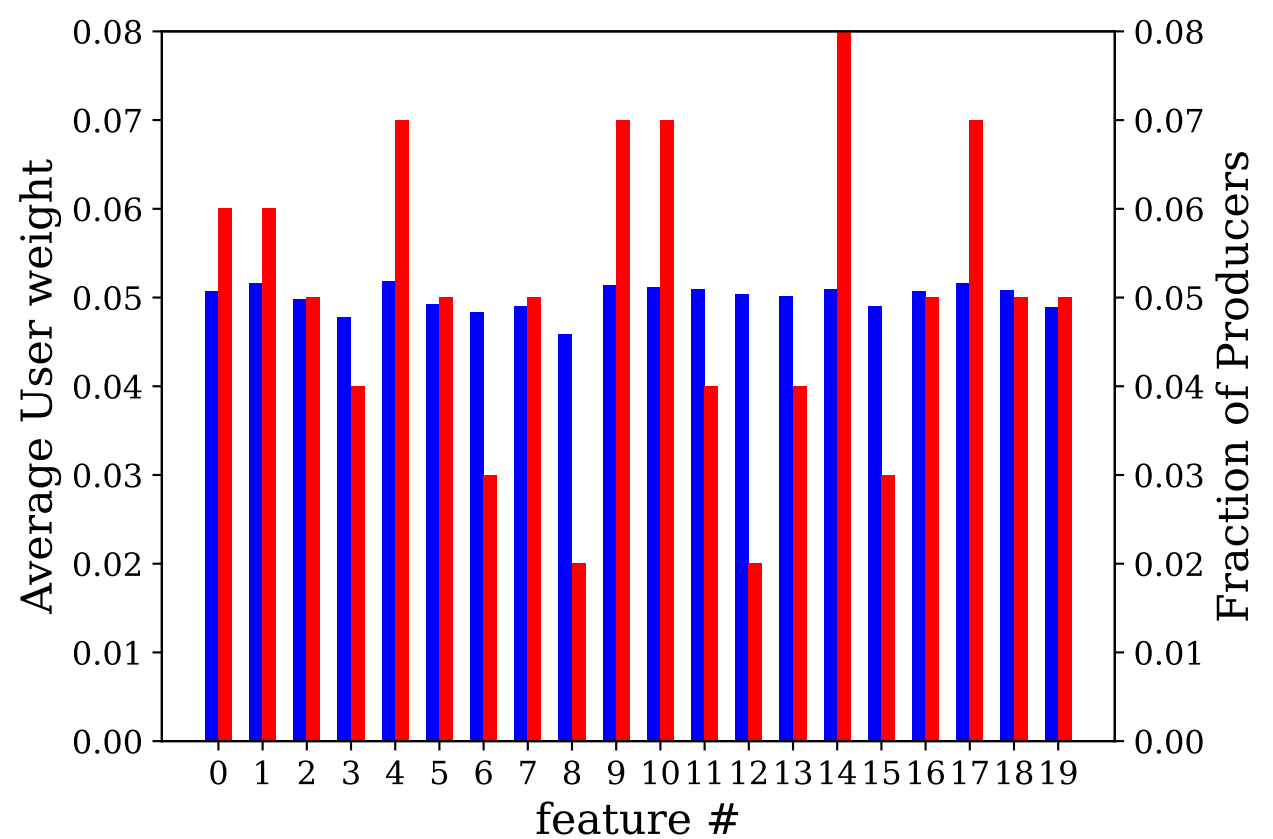

Supplement: supplementary_material [file attachment]

Average user utility

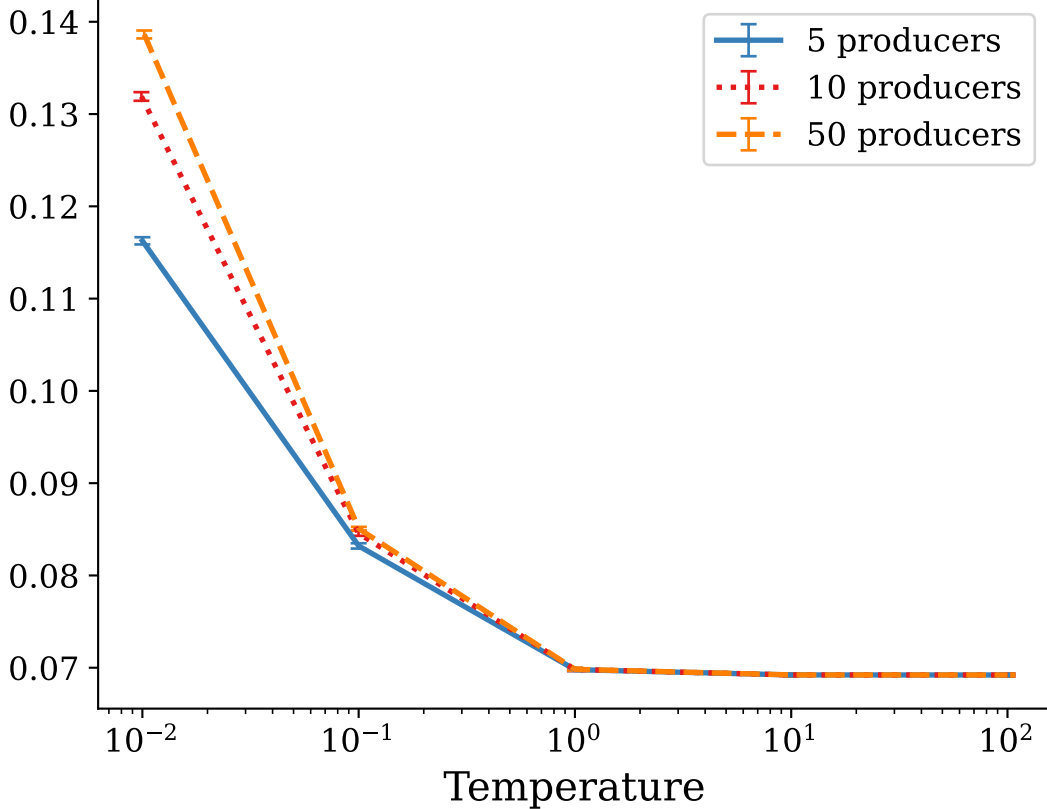

Supplement: supplementary_material [file attachment]

Average producer utility

- 50 producers, linear
- 50 producers, softmax

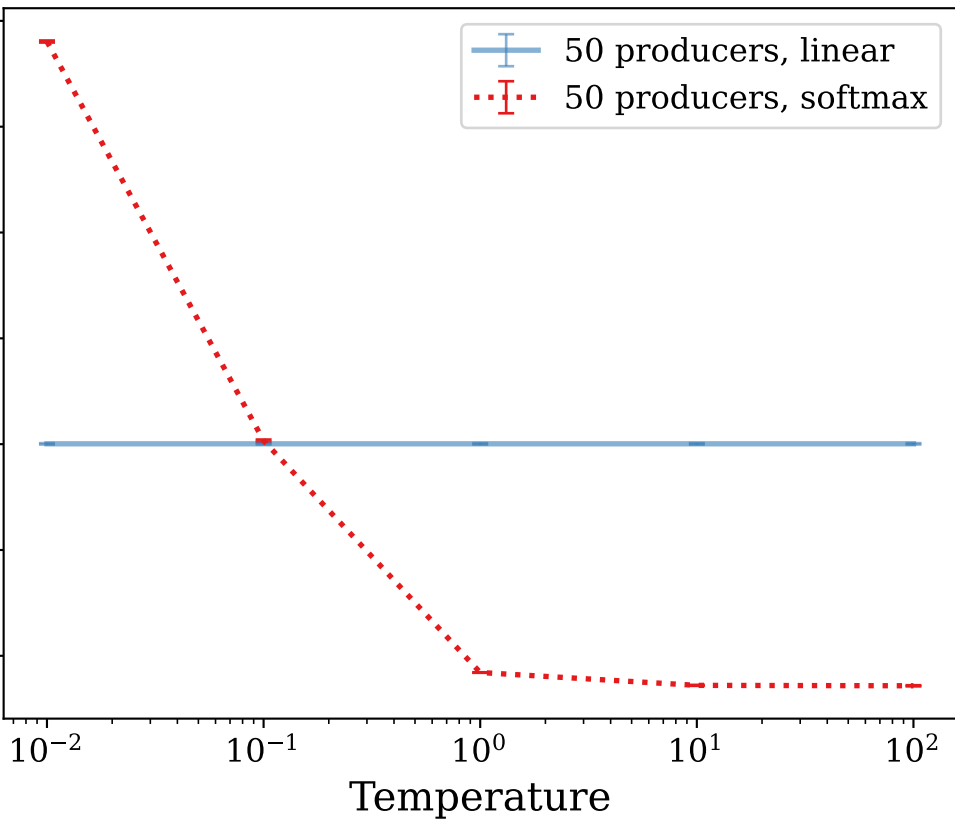

Supplement: supplementary_material [file attachment]

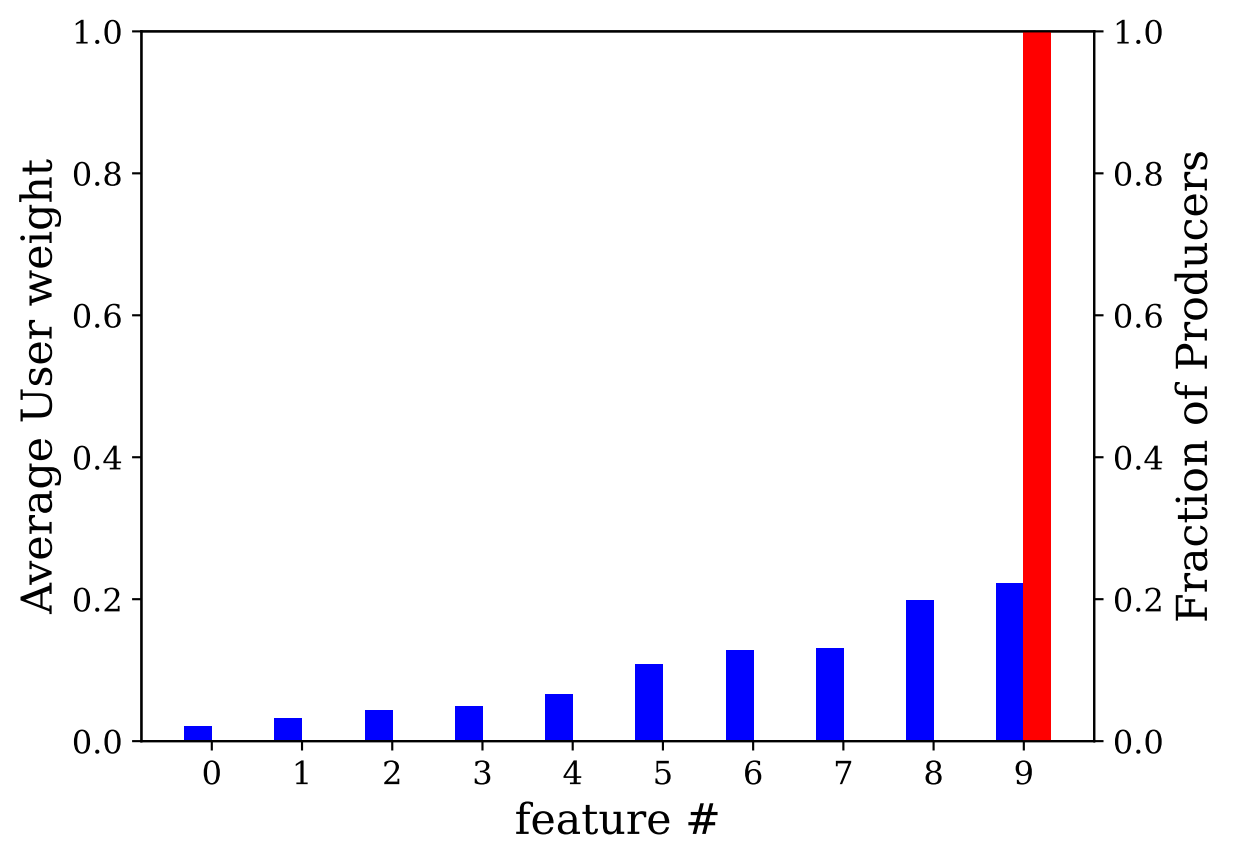

Supplement: supplementary_material [file attachment]

Average producer utility

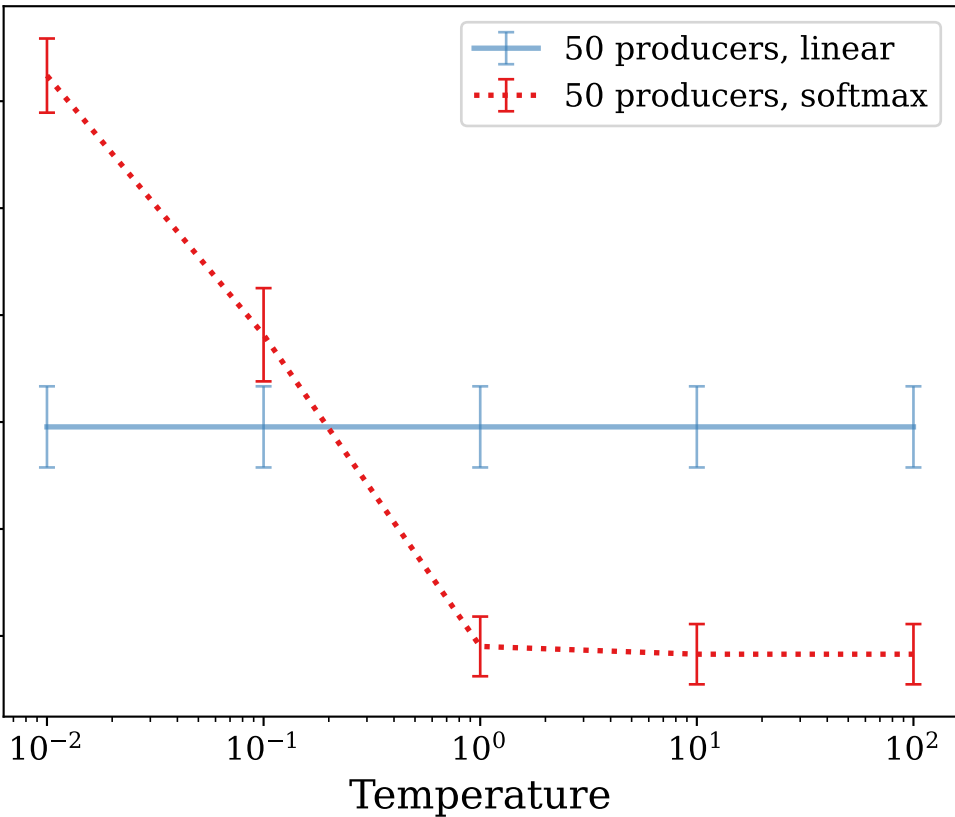

Supplement: supplementary_material [file attachment]

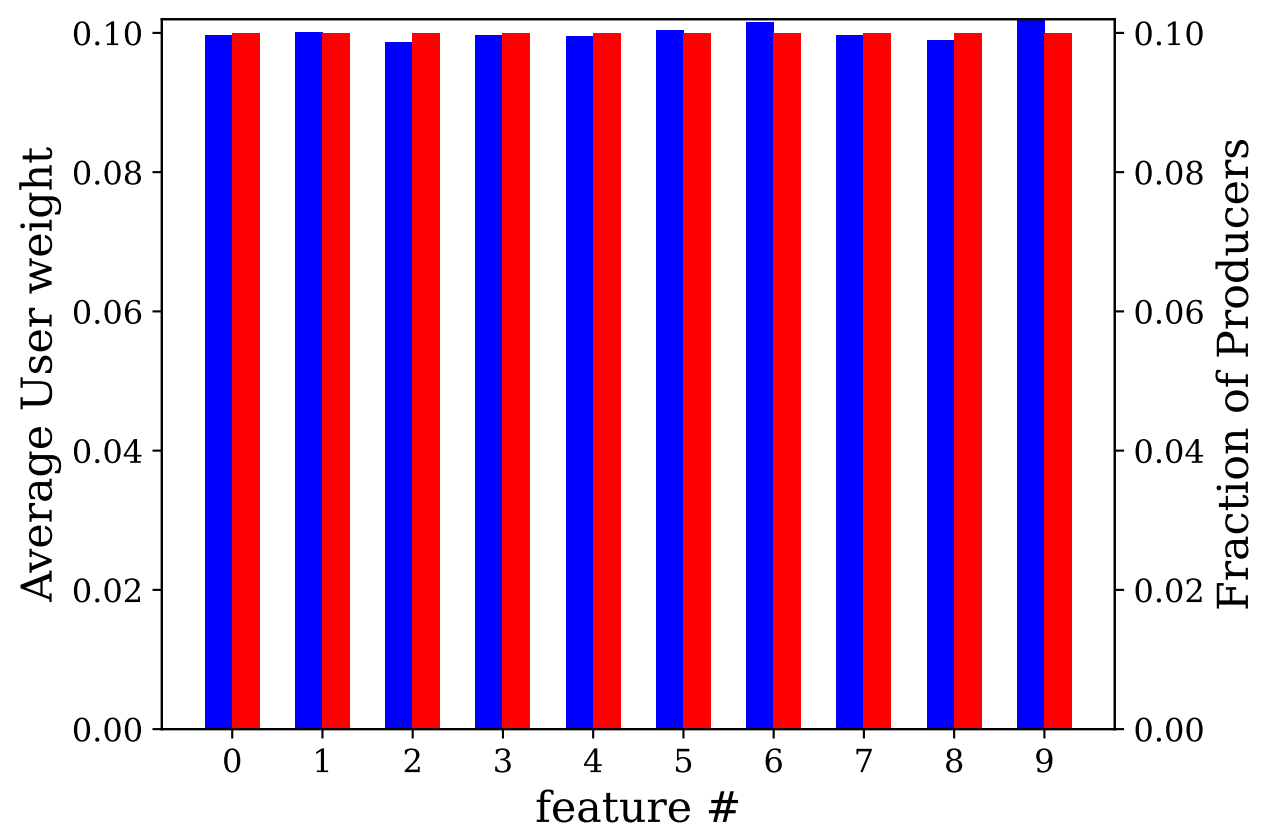

Supplement: supplementary_material [file attachment]

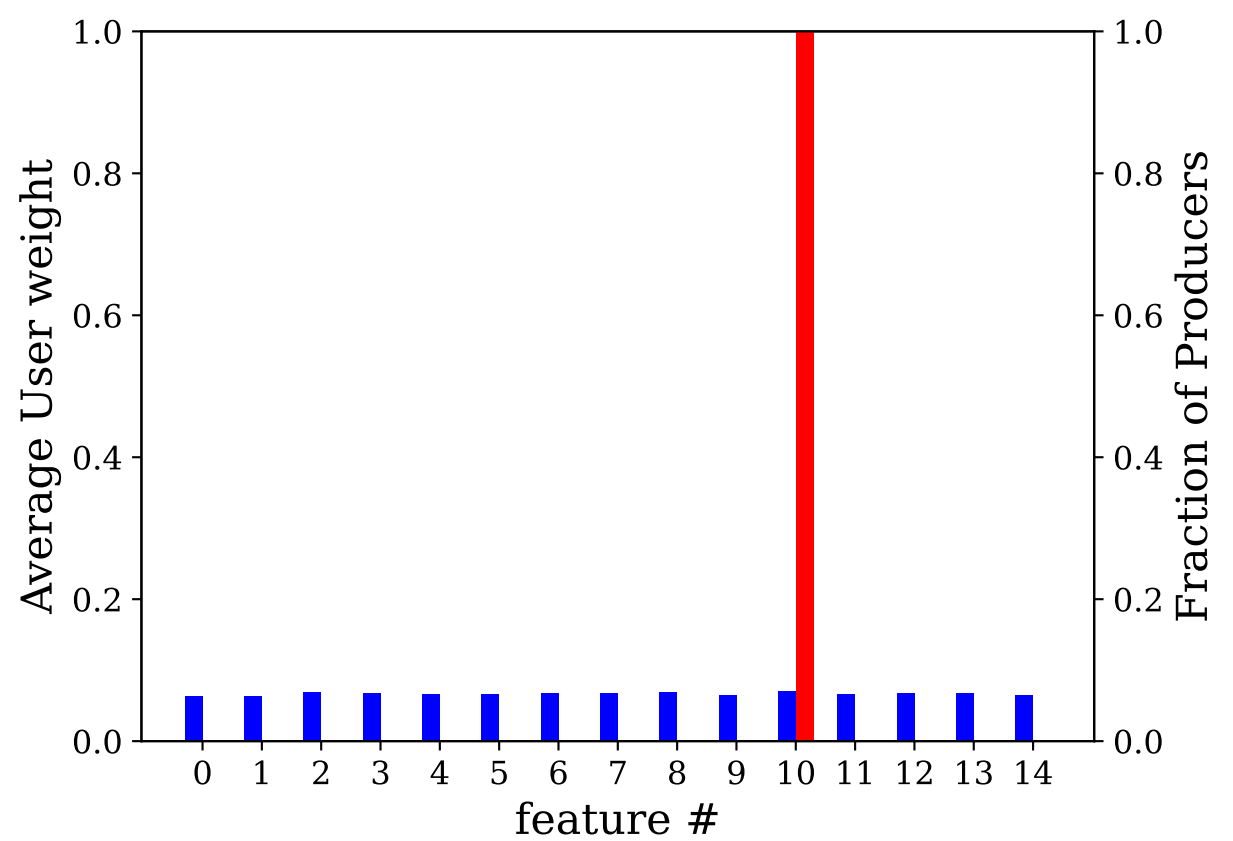

Supplement: supplementary_material [file attachment]

Average User weight

Fraction of Producers

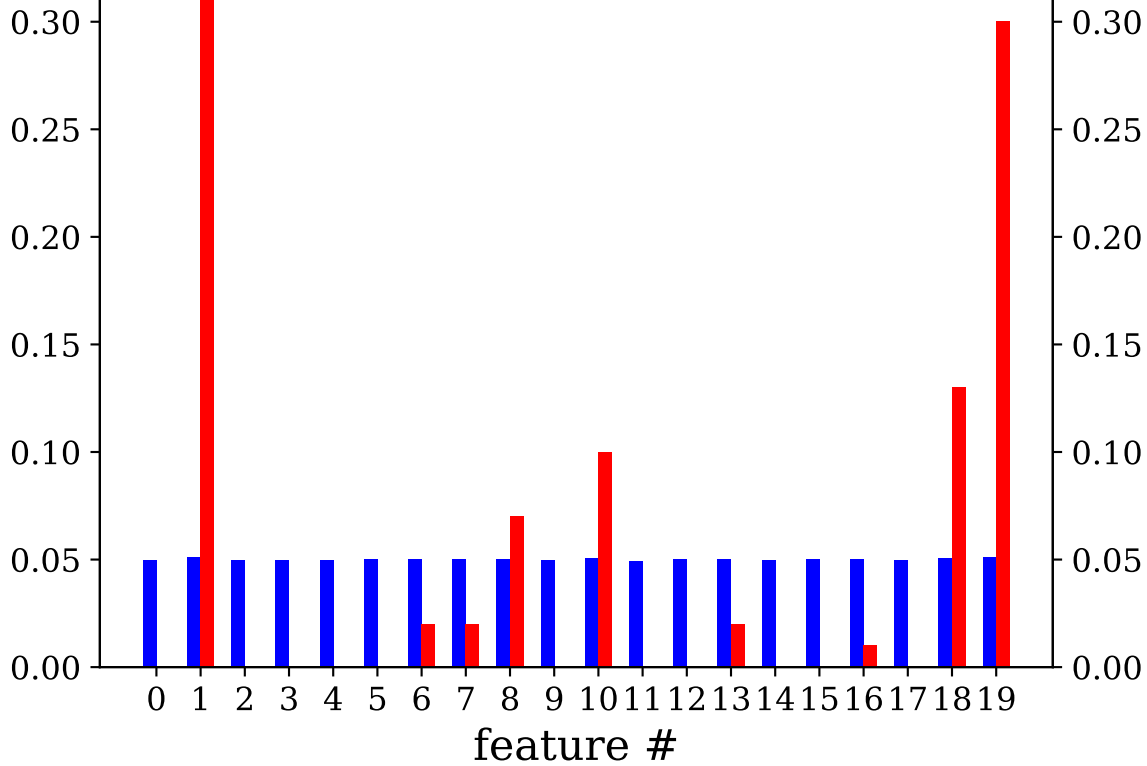

Supplement: supplementary_material [file attachment]

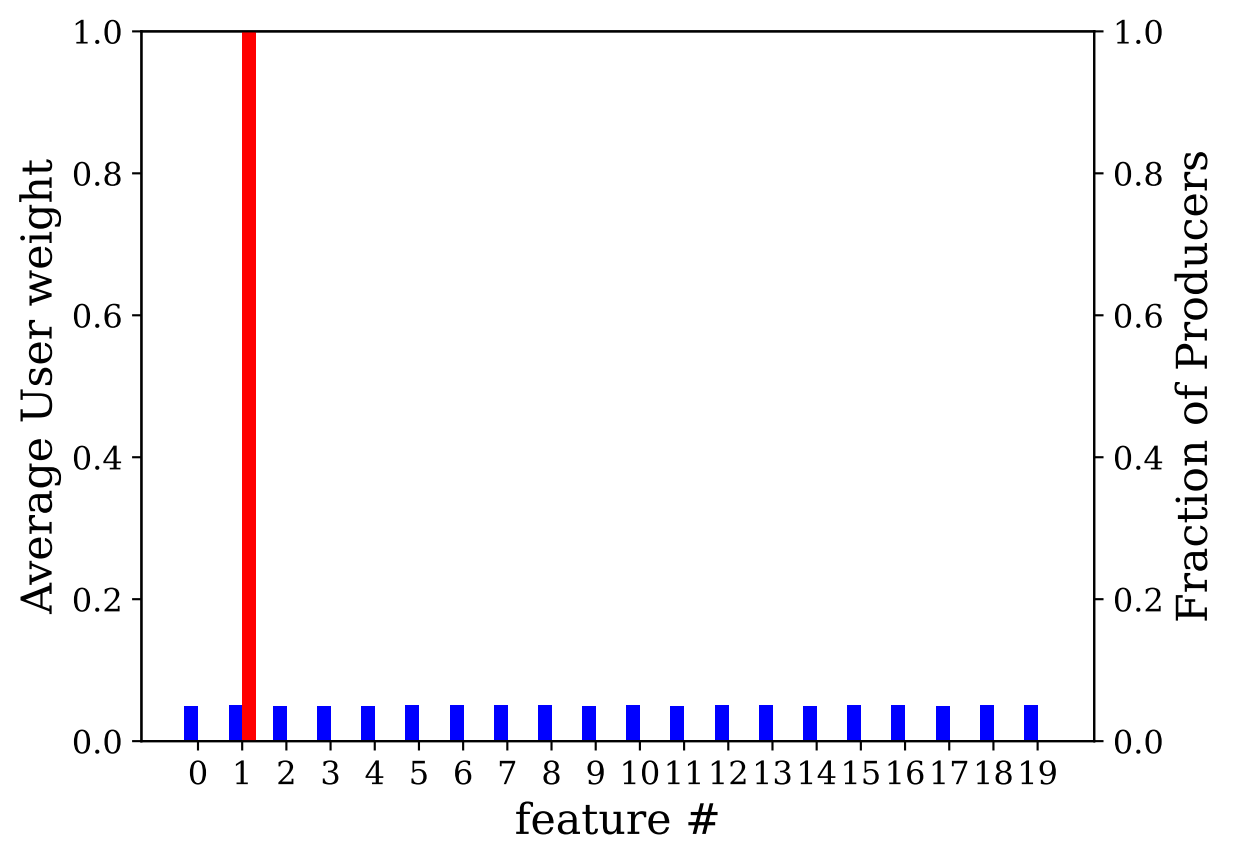

Supplement: supplementary_material [file attachment]

Average producer utility

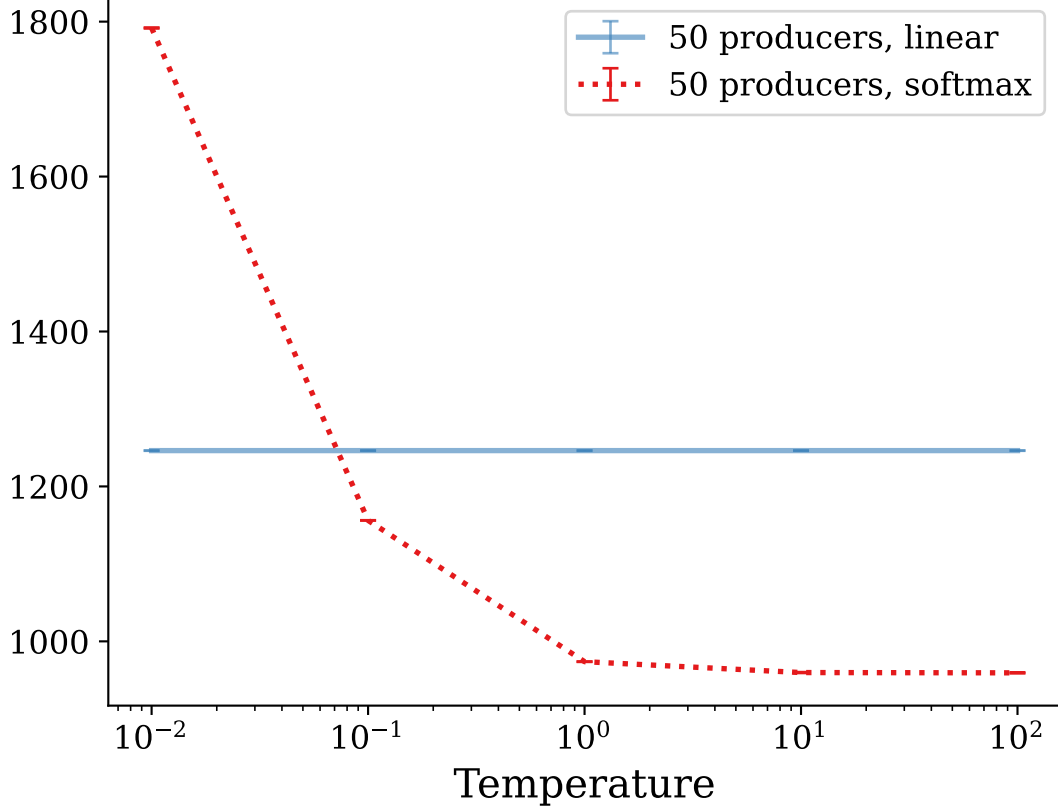

Supplement: supplementary_material [file attachment]

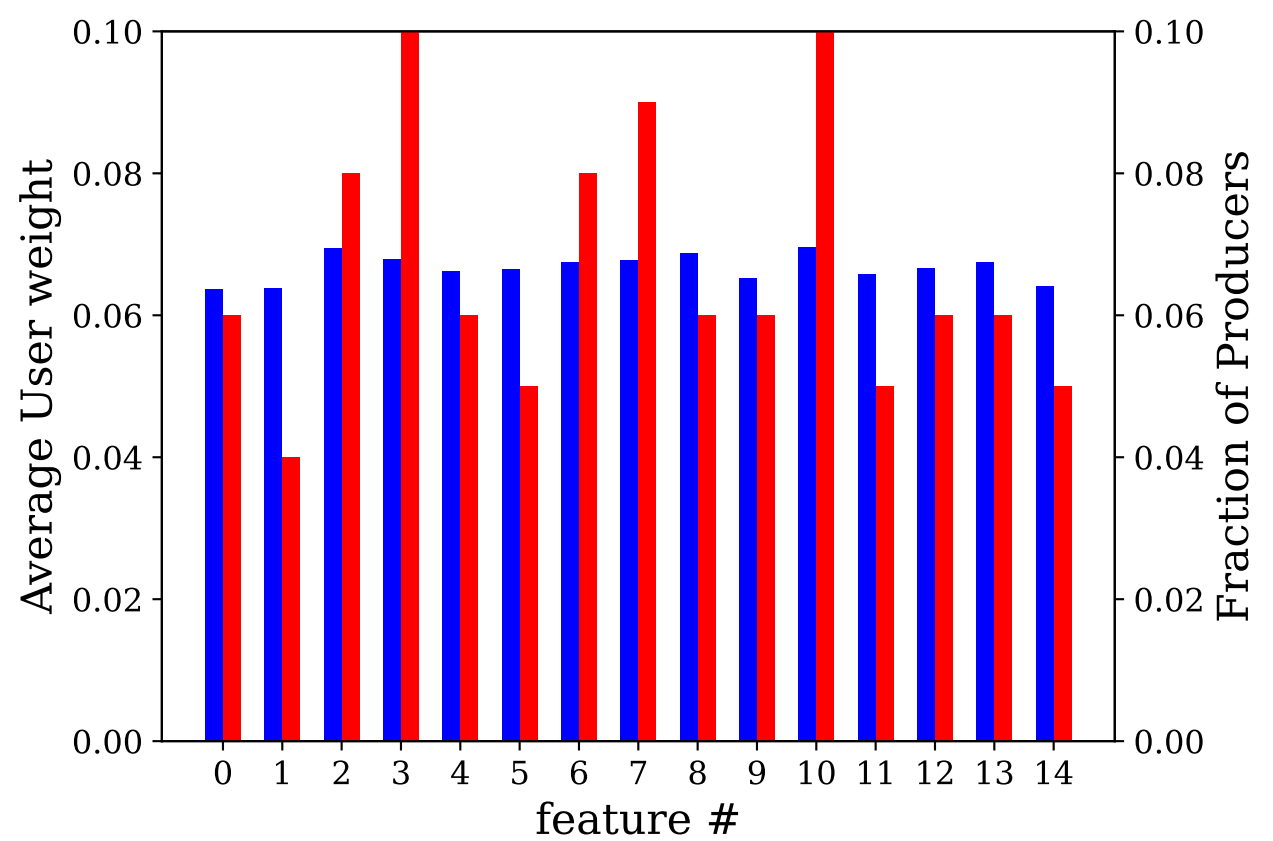

Supplement: supplementary_material [file attachment]

Average User weight

Fraction of Producers

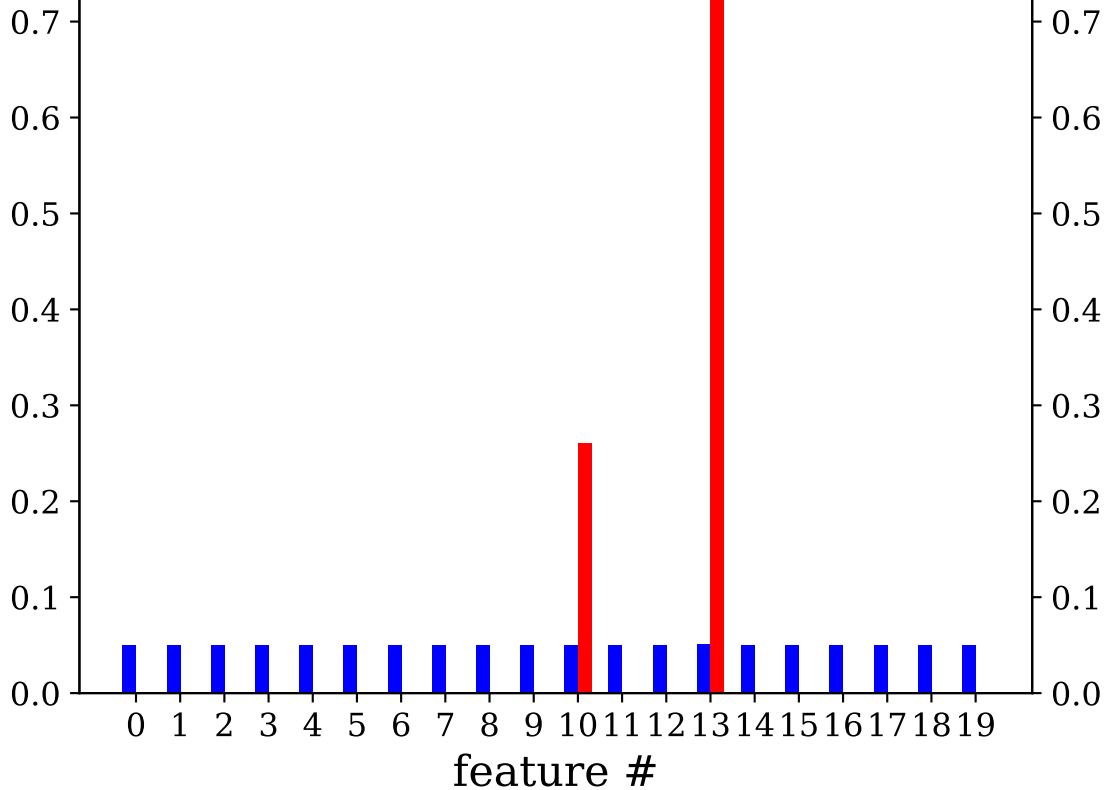

Supplement: supplementary_material [file attachment]

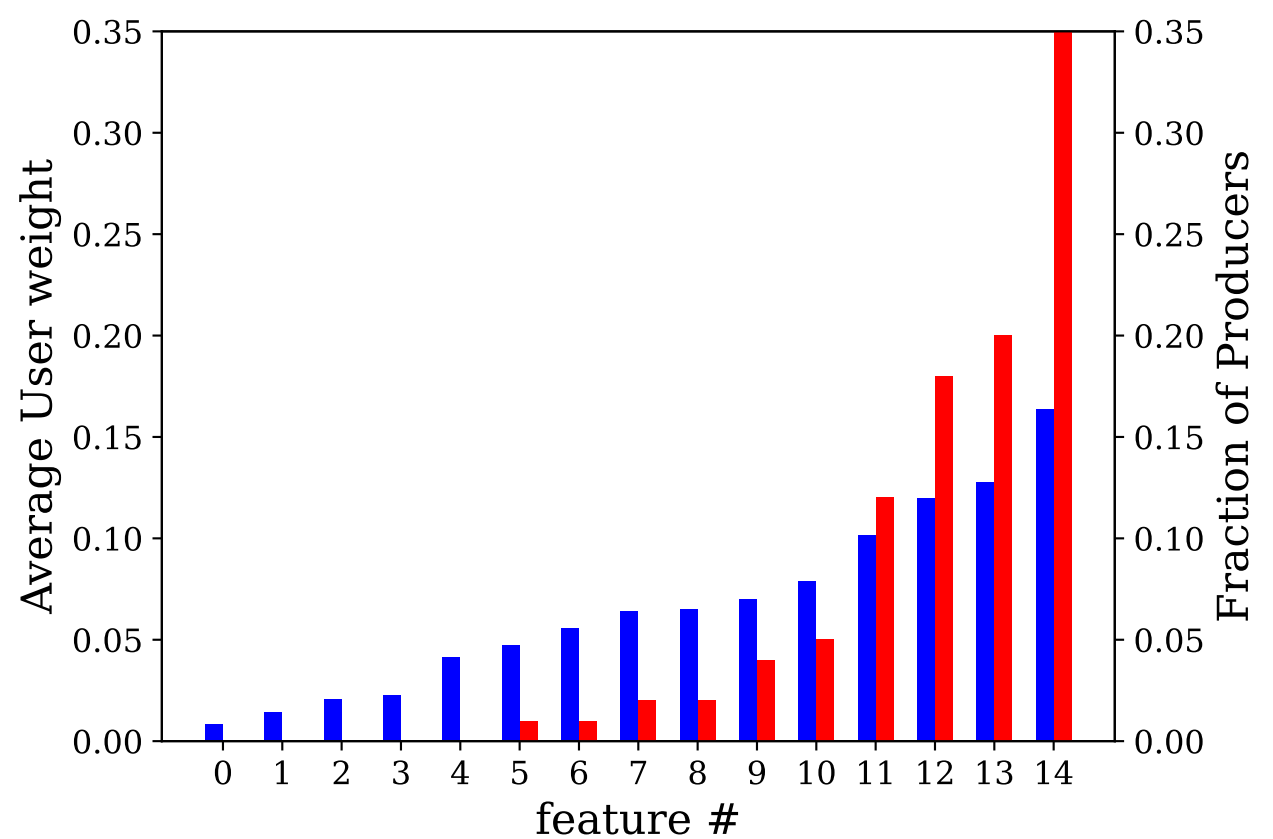

Supplement: supplementary_material [file attachment]

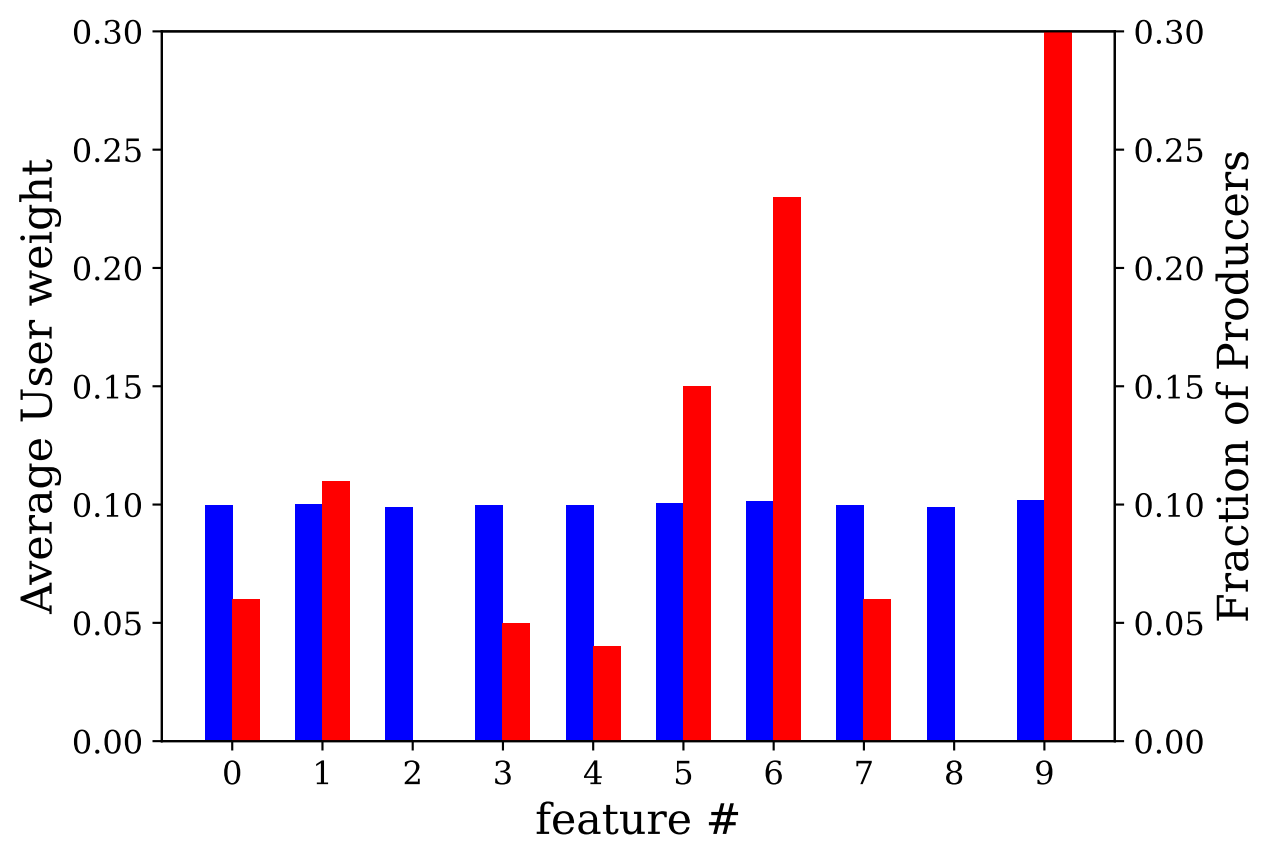

Supplement: supplementary_material [file attachment]

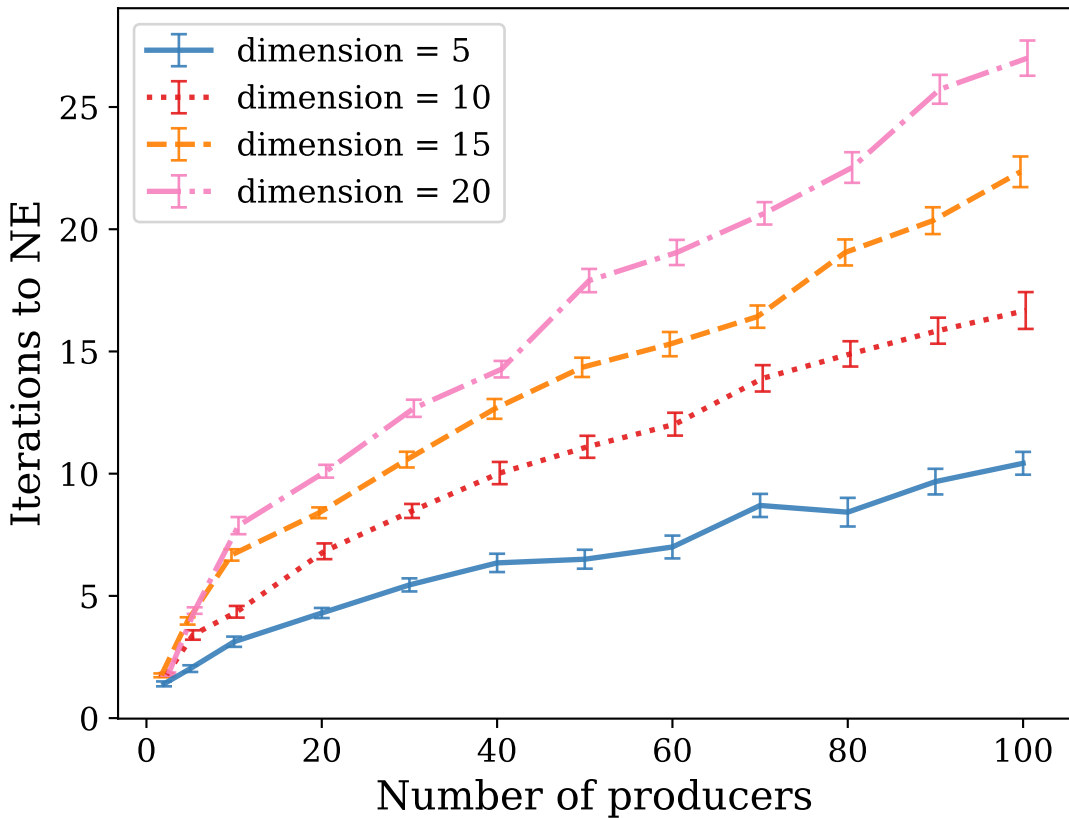

Supplement: supplementary_material [file attachment]

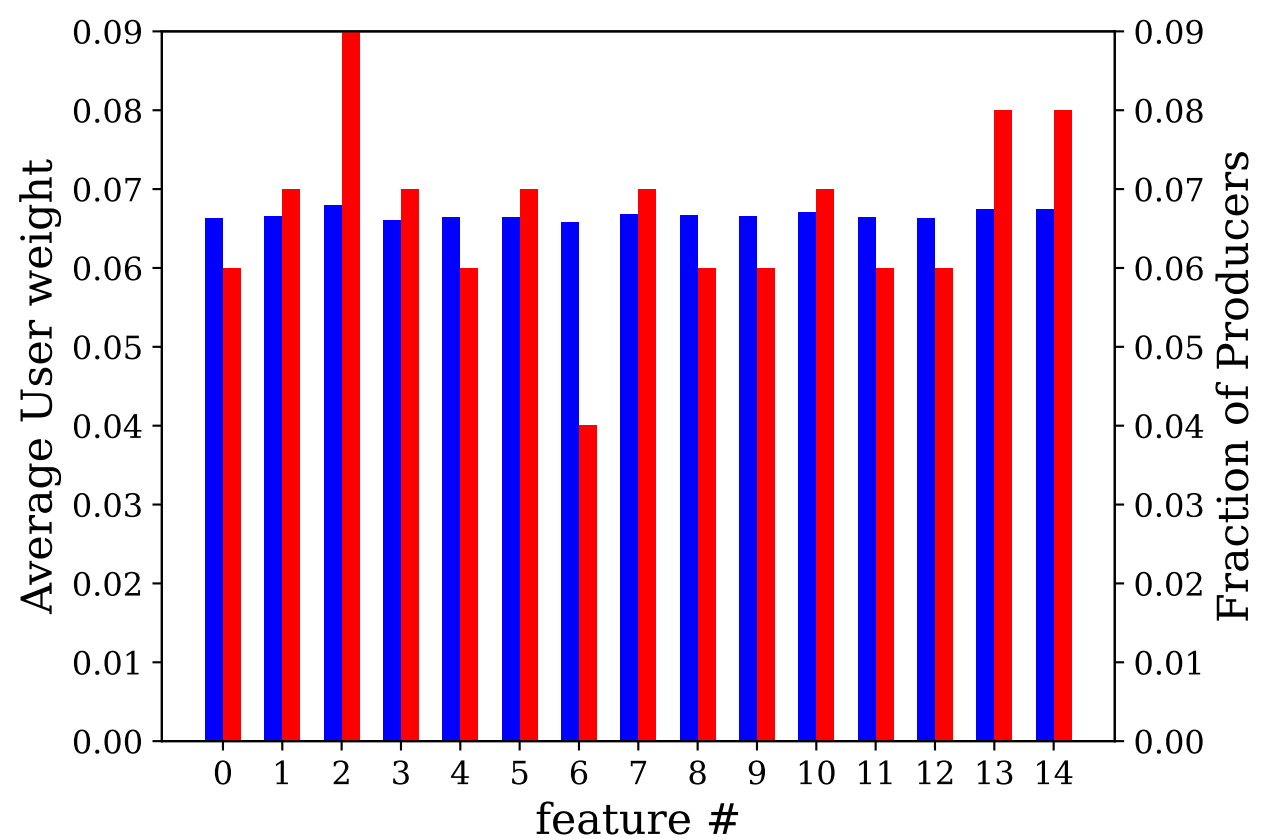

Supplement: supplementary_material [file attachment]

Average User weight

Fraction of Producers

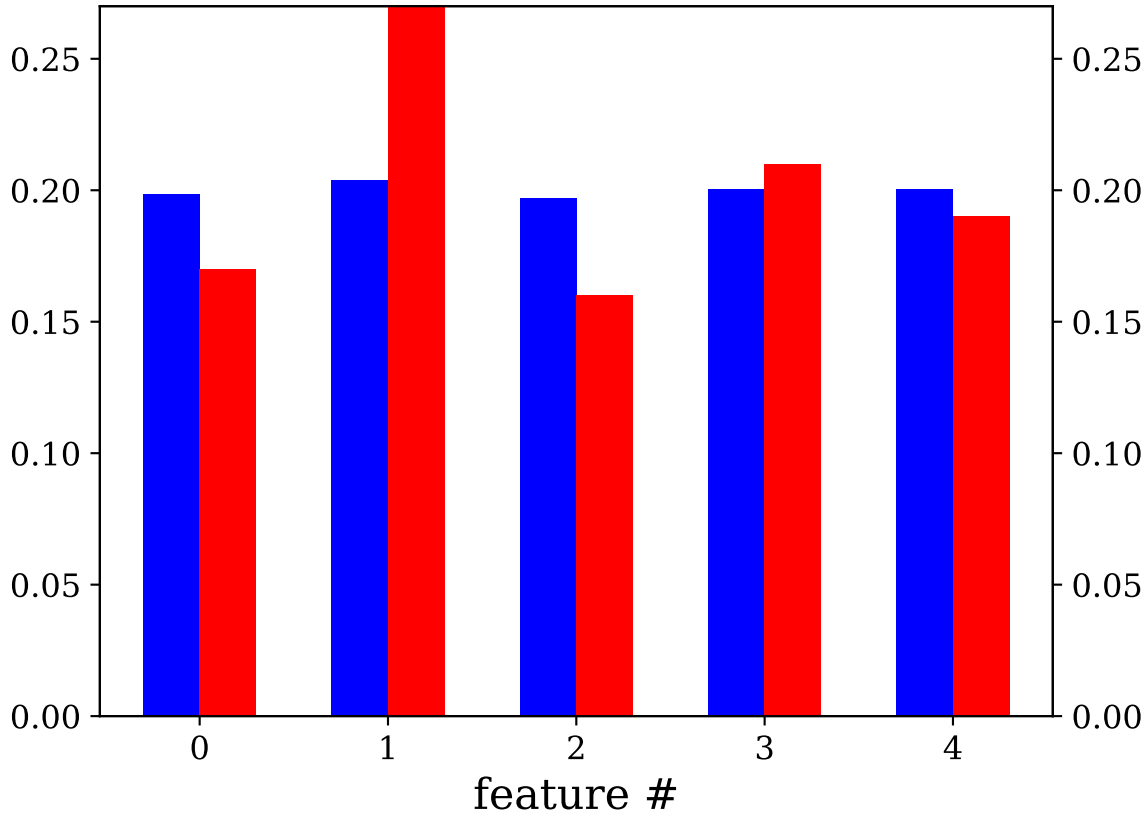

Supplement: supplementary_material [file attachment]

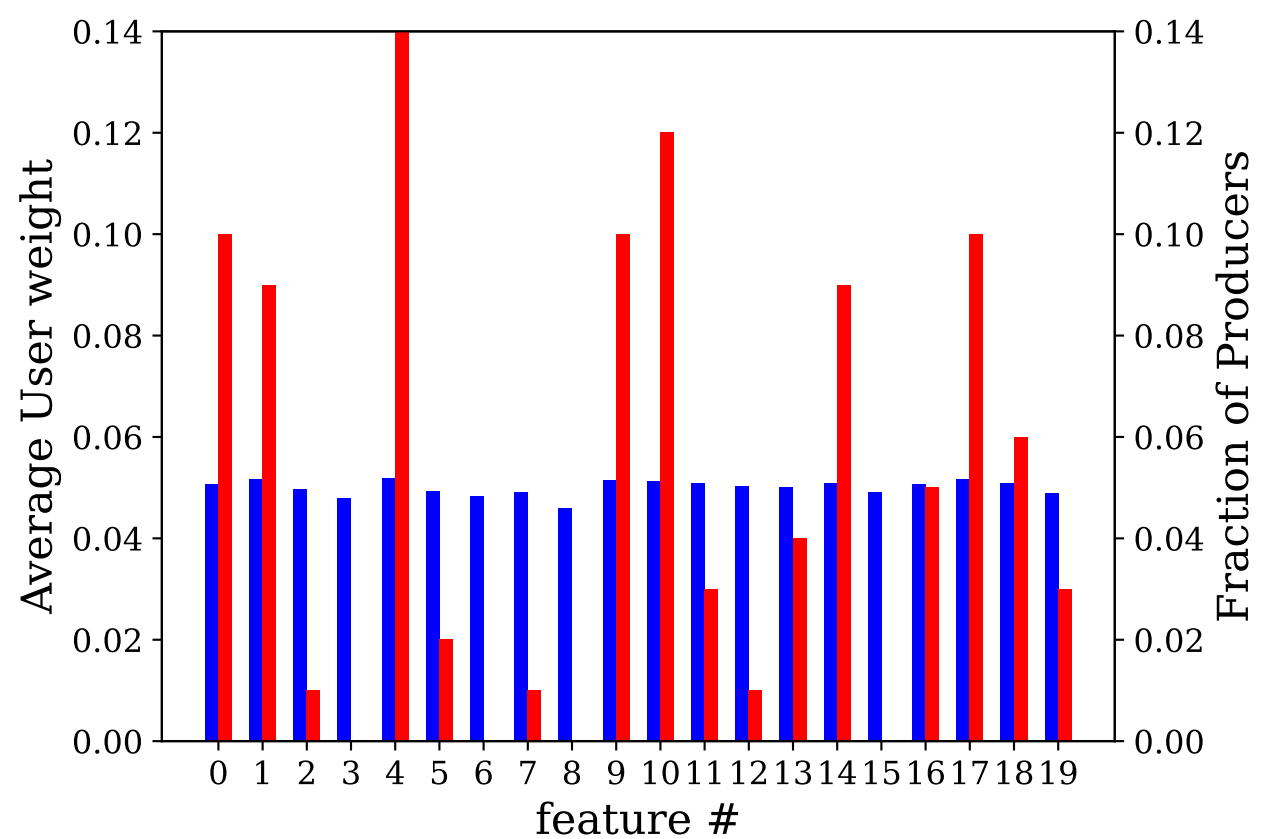

Supplement: supplementary_material [file attachment]

Average user utility

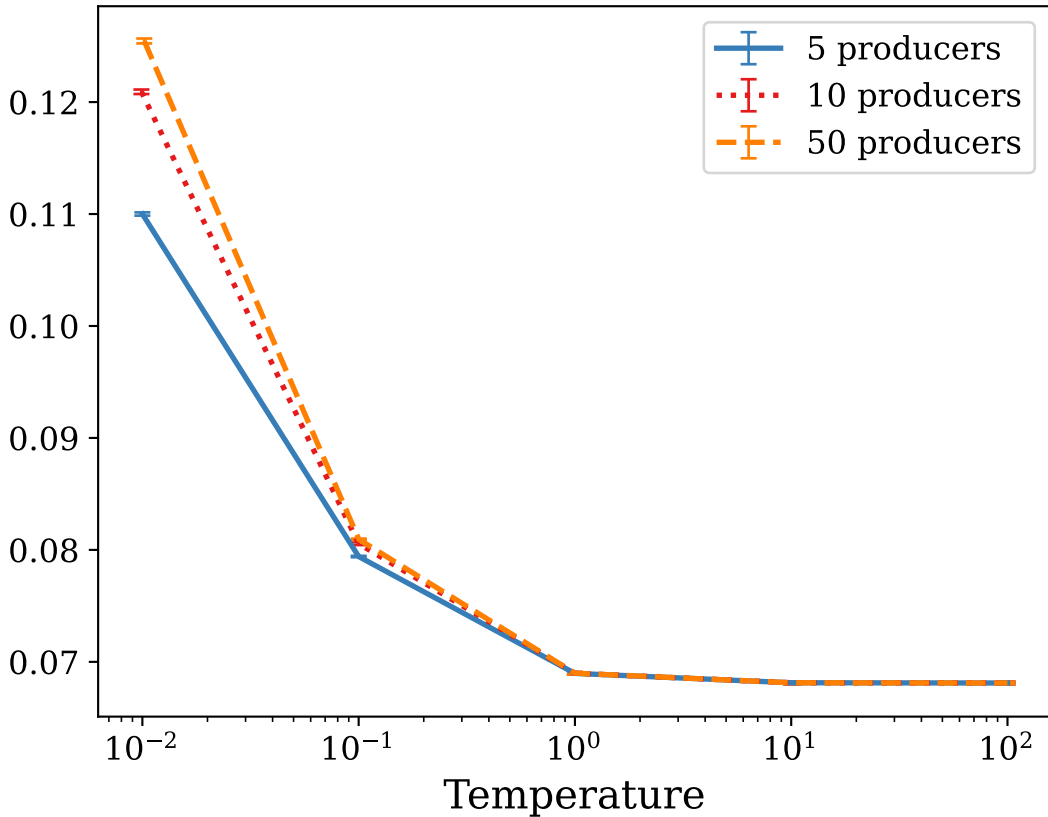

Supplement: supplementary_material [file attachment]

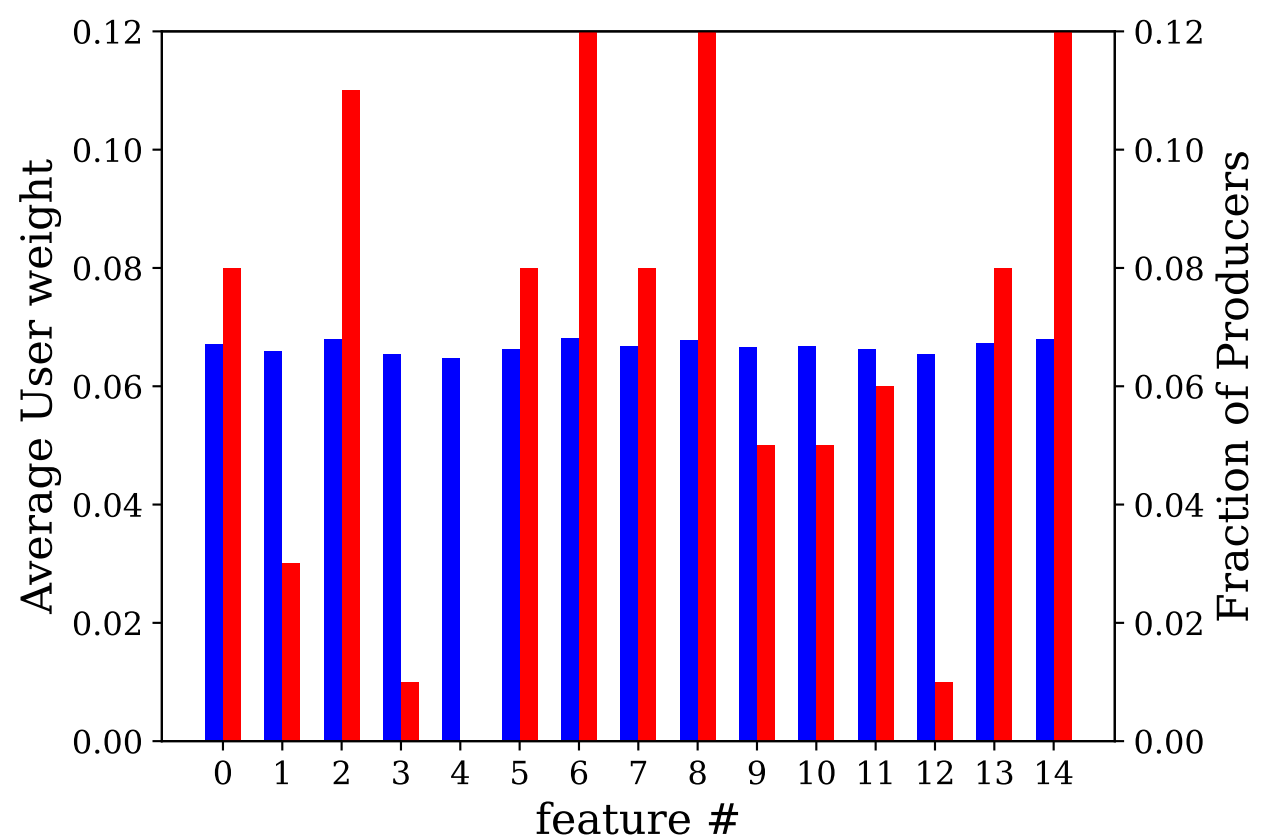

Supplement: supplementary_material [file attachment]

Average producer utility

- 50 producers, linear
- 50 producers, softmax

Temperature

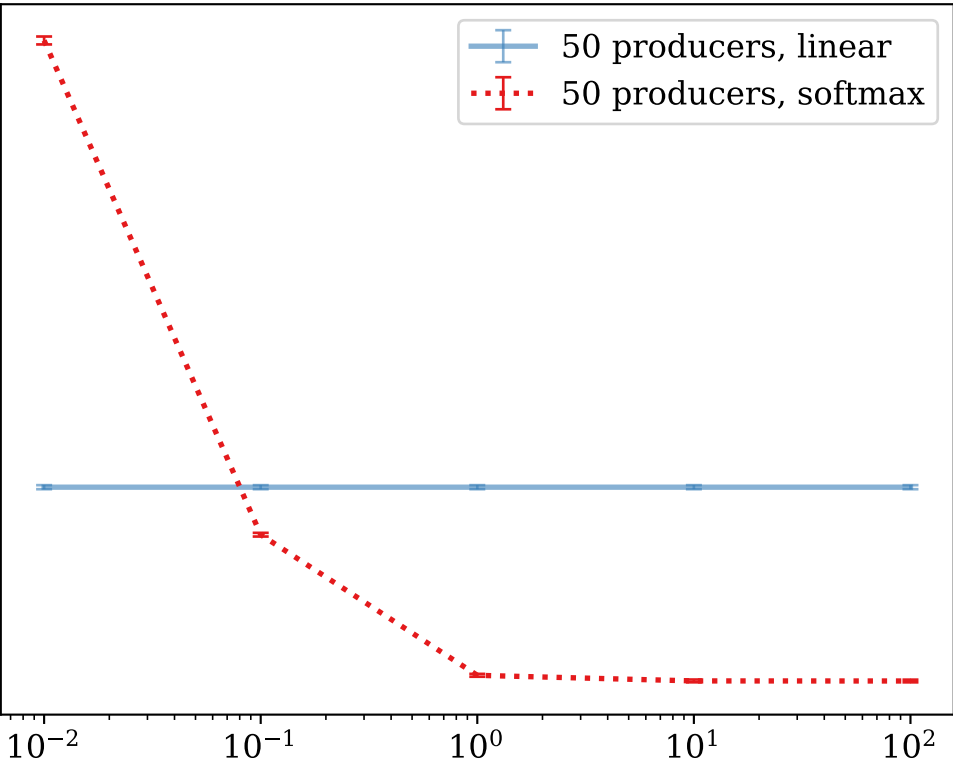

Supplement: supplementary_material [file attachment]

Average User weight

Fraction of Producers

0.25  
0.20  
0.15  
0.10  
0.05  
0.00

0.25  
0.20  
0.15  
0.10  
0.05  
0.00

0

1

2

3

4

feature #

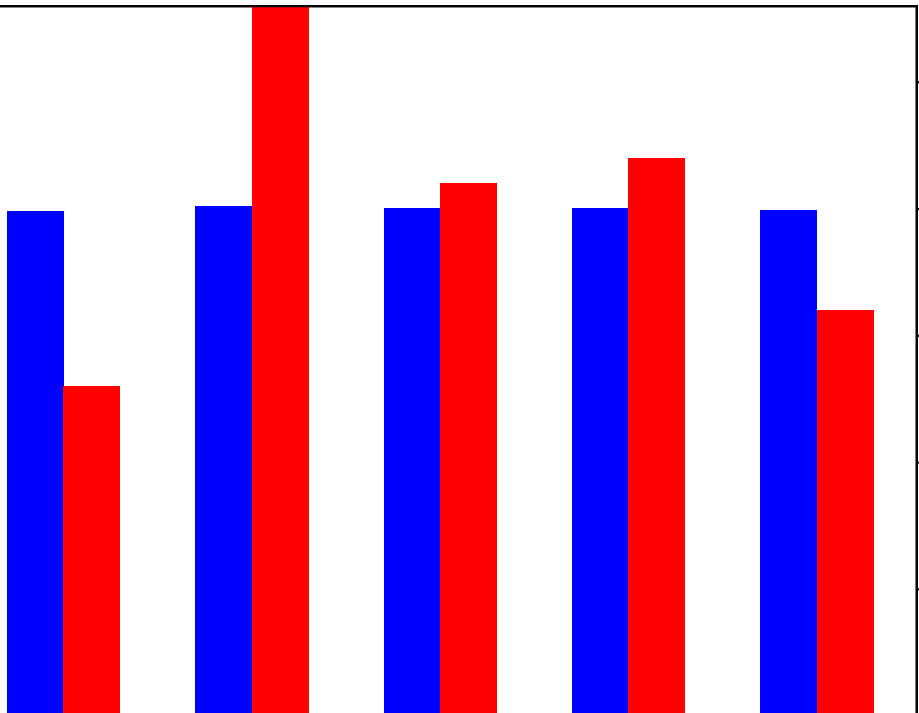

Supplement: supplementary_material [file attachment]



Supplement: supplementary_material [file attachment]

Average User weight

Fraction of Producers

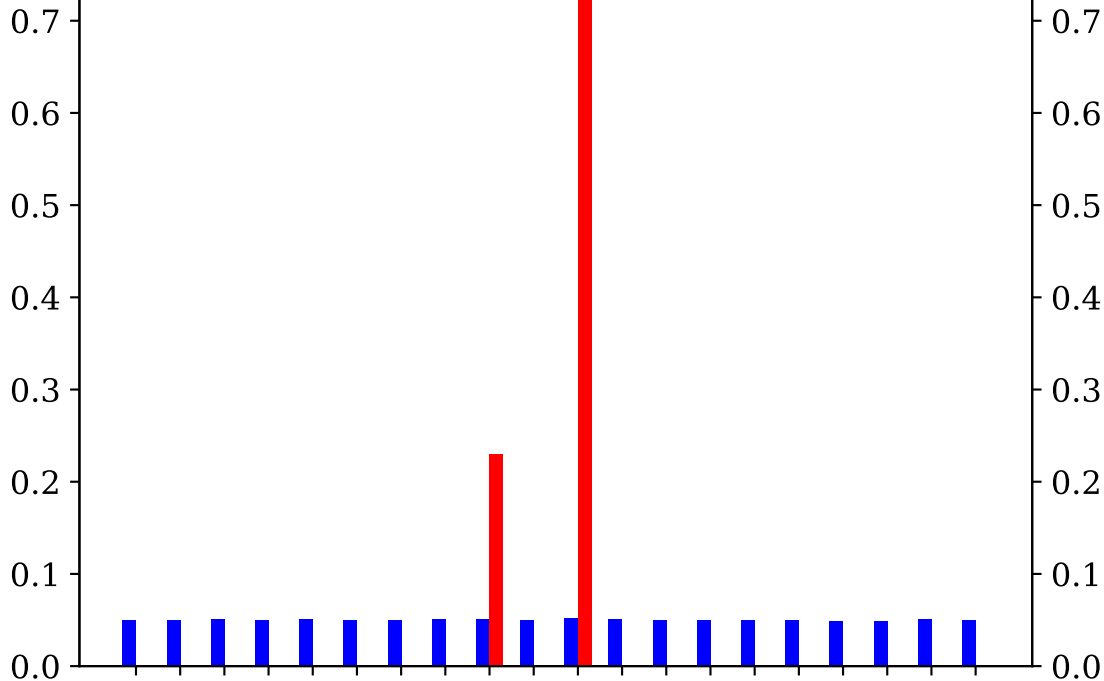

feature #

Supplement: supplementary_material [file attachment]

Average User weight

Fraction of Producers

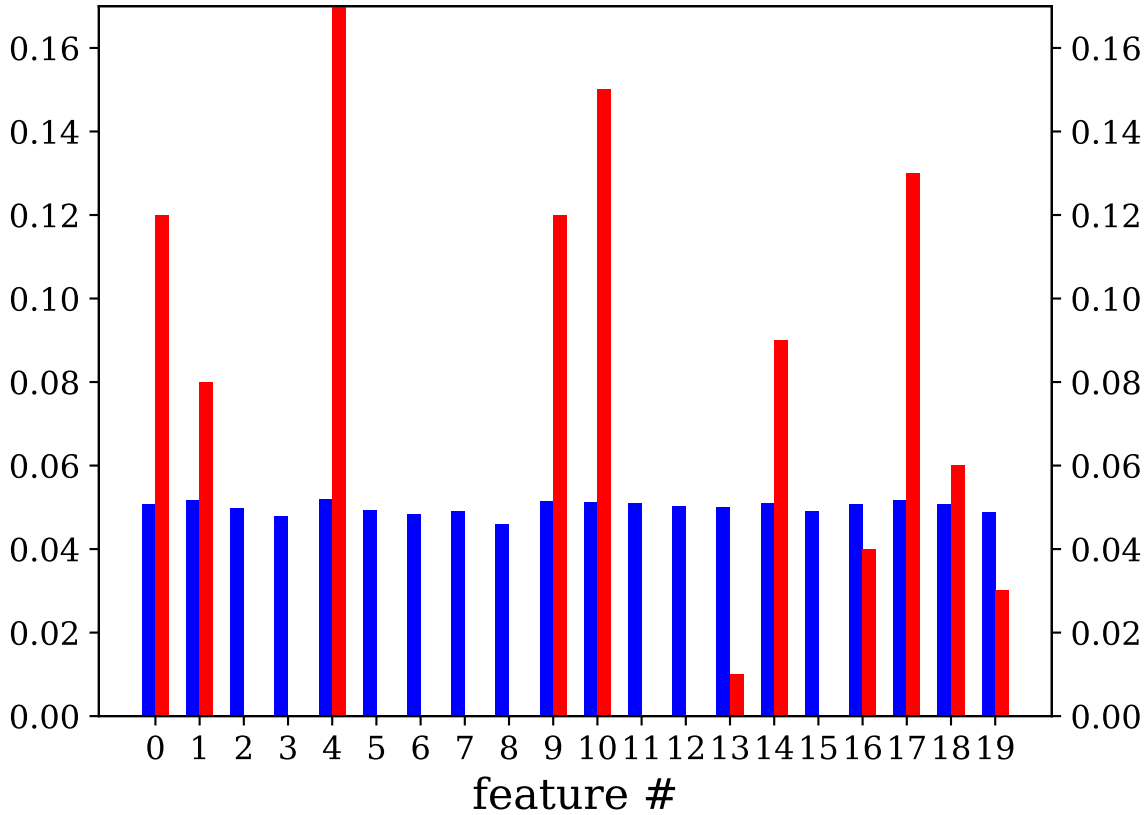

Supplement: supplementary_material [file attachment]

Average user utility

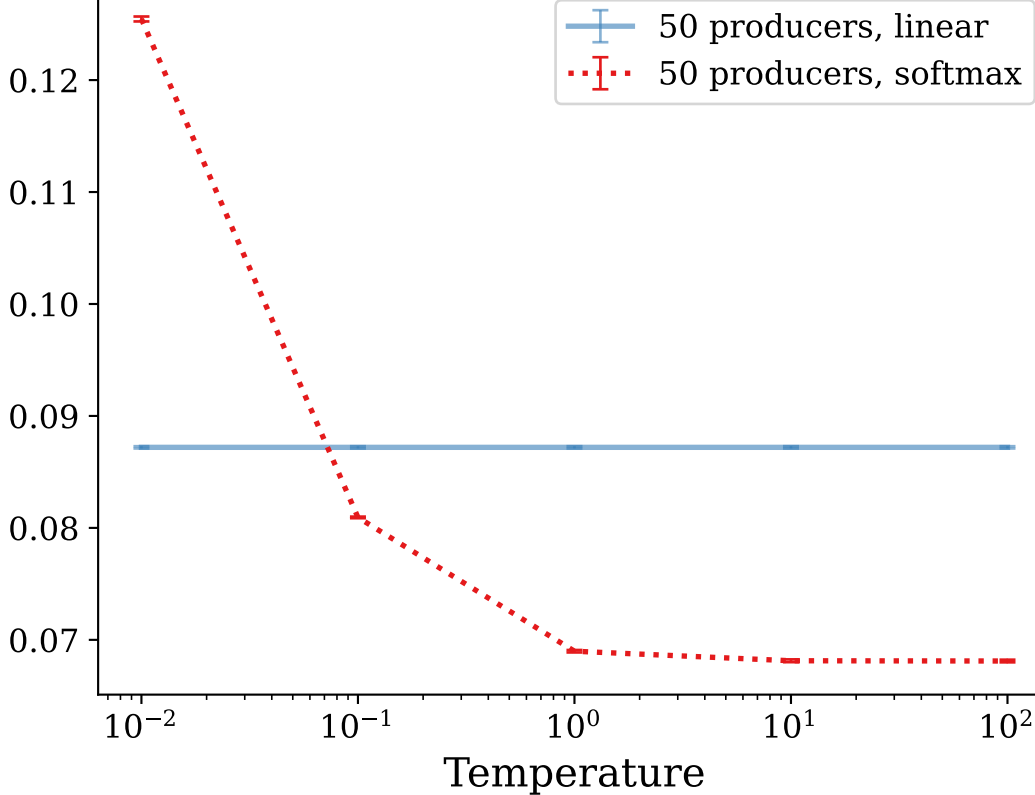

Supplement: supplementary_material [file attachment]

Average User weight

Fraction of Producers

0.6  
0.5  
0.4  
0.3  
0.2  
0.1  
0.0

0.6  
0.5  
0.4  
0.3  
0.2  
0.1  
0.0

0

1

2

3

4

5

6

7

8

9

feature #

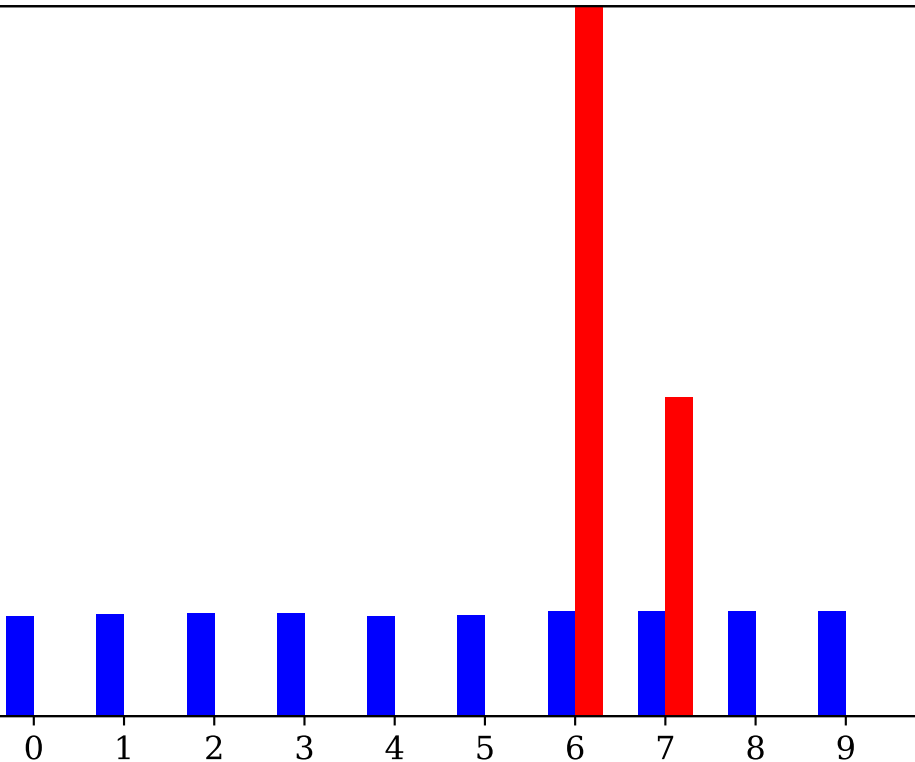

Supplement: supplementary_material [file attachment]

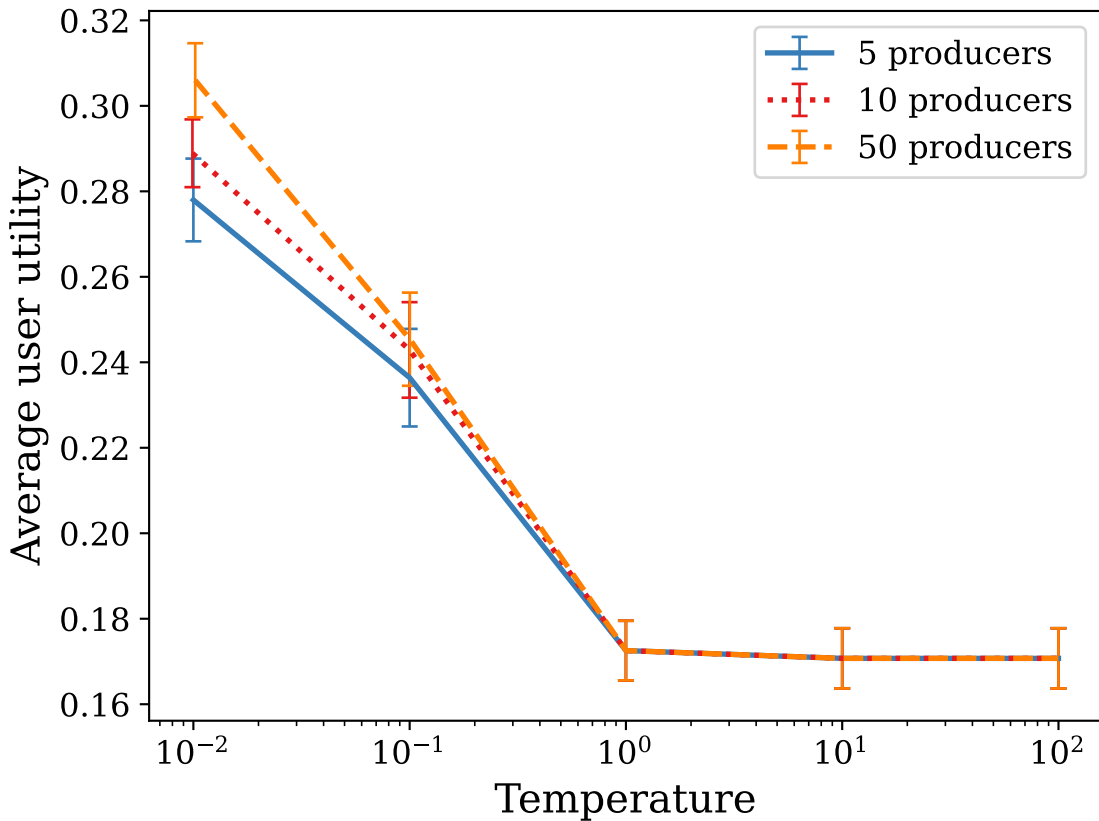

Supplement: supplementary_material [file attachment]

Average user utility

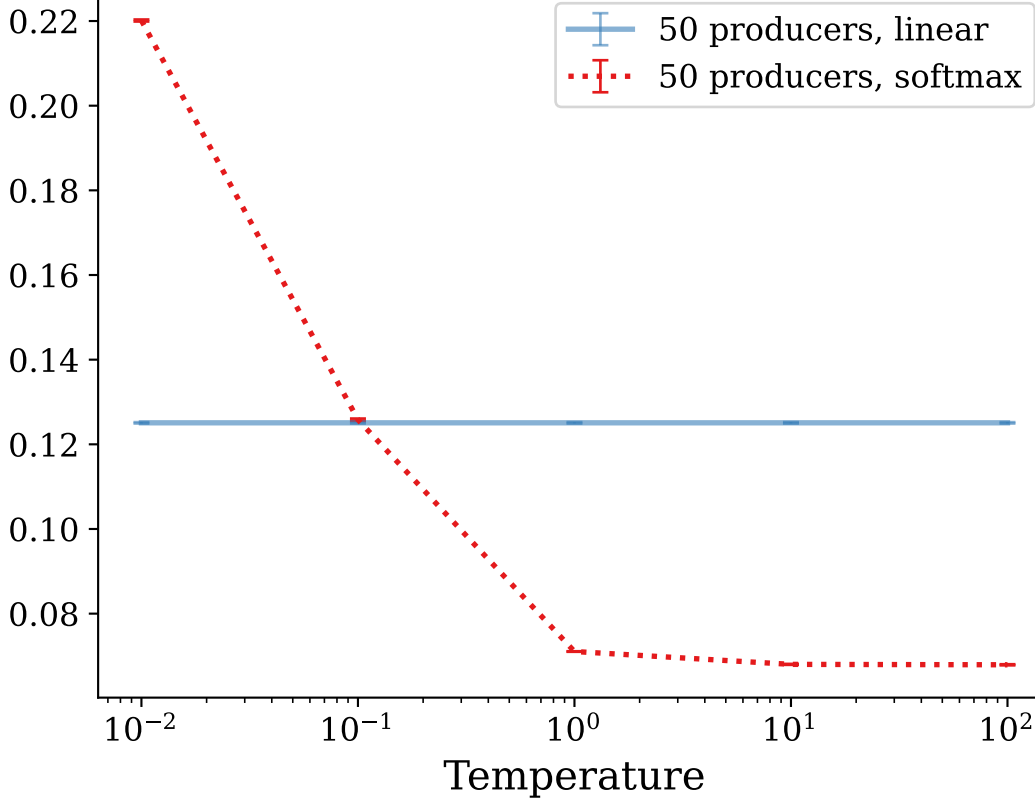

Supplement: supplementary_material [file attachment]

Average User weight

Fraction of Producers

0.25  
0.20  
0.15  
0.10  
0.05  
0.00

0.25  
0.20  
0.15  
0.10  
0.05  
0.00

0

1

2

3

4

feature #

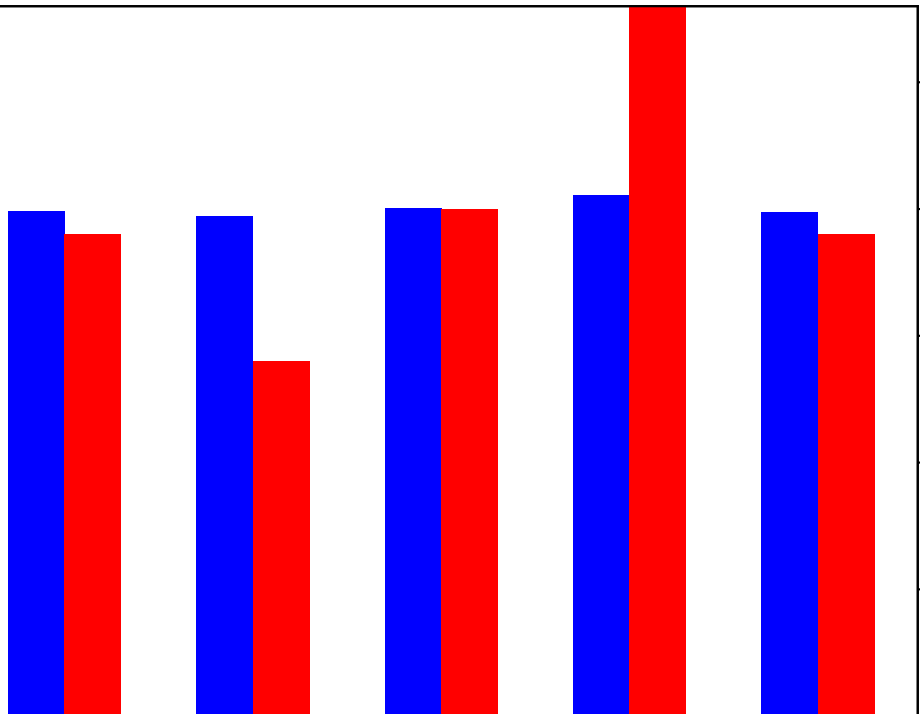

Supplement: supplementary_material [file attachment]

Average User weight

Fraction of Producers

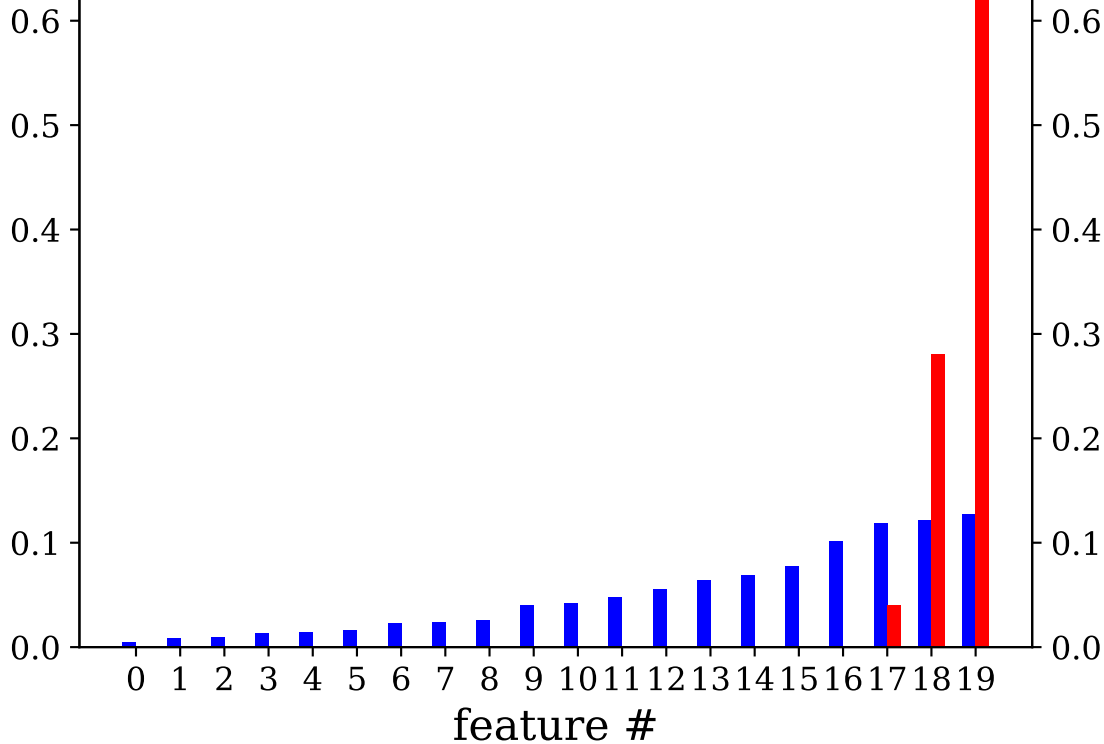

Supplement: supplementary_material [file attachment]

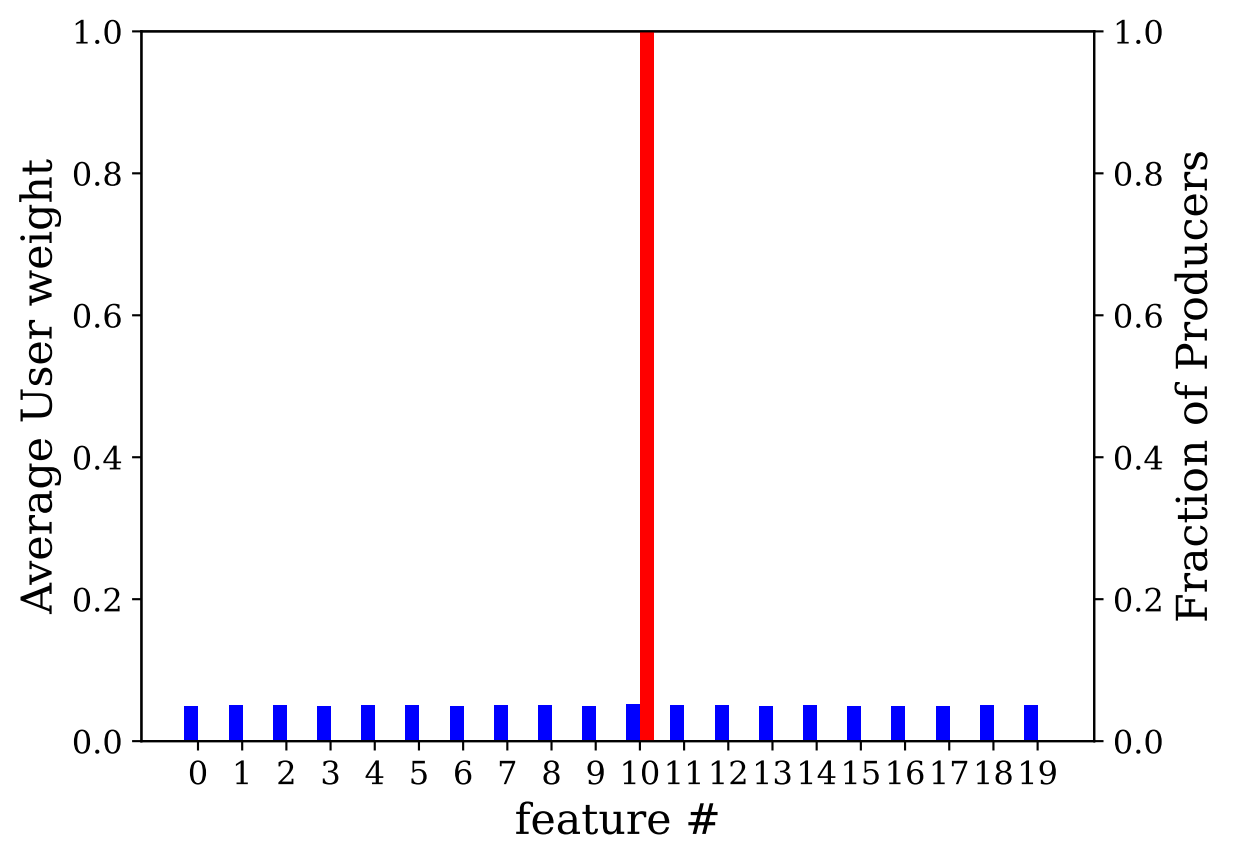

Supplement: supplementary_material [file attachment]

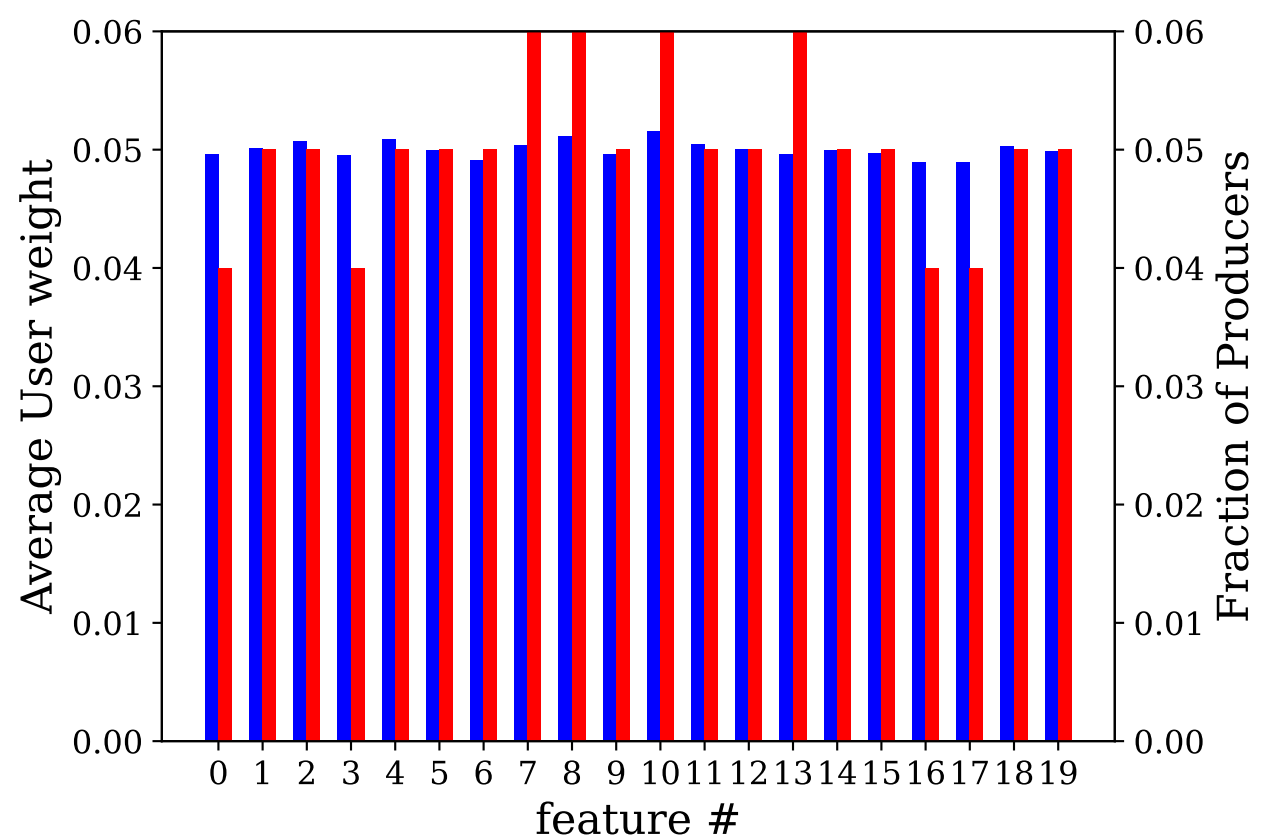

Supplement: supplementary_material [file attachment]

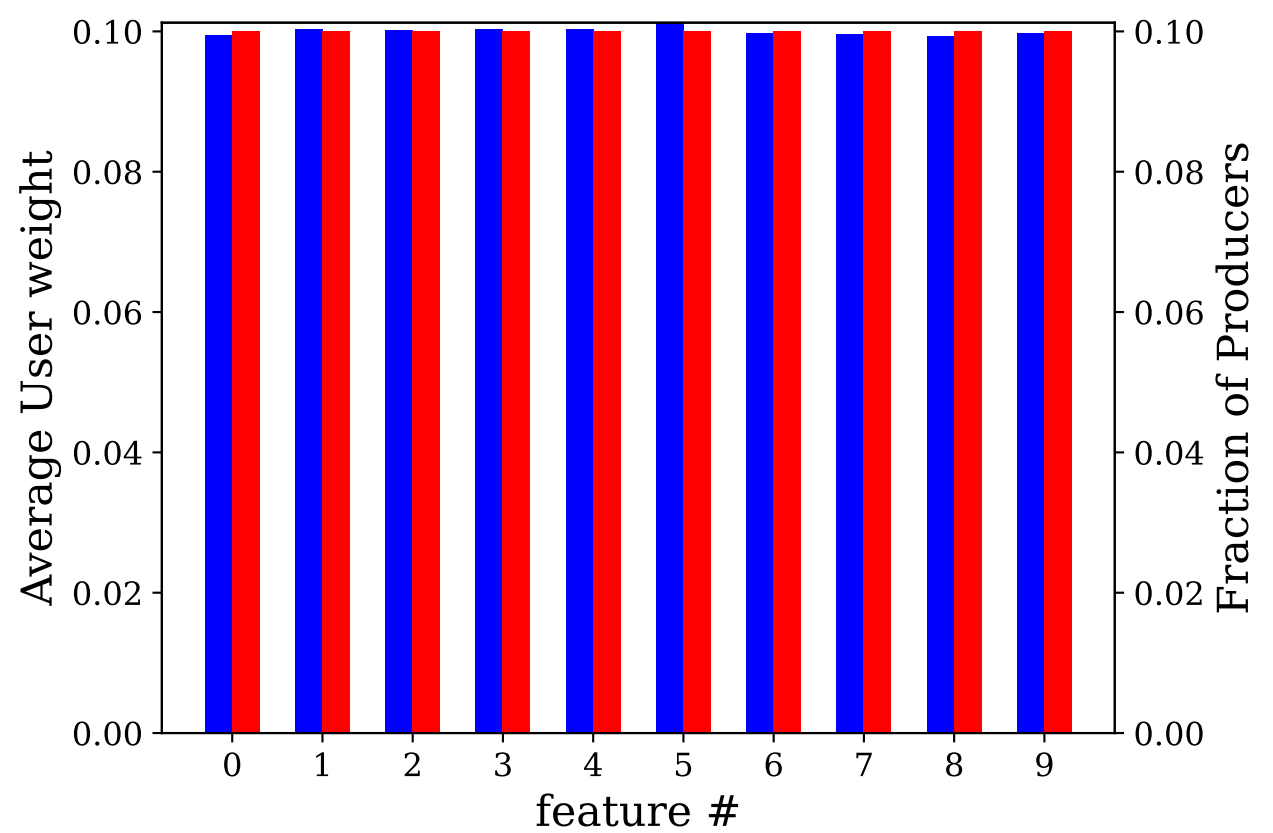

Supplement: supplementary_material [file attachment]

Average User weight

0.200  
0.175  
0.150  
0.125  
0.100  
0.075  
0.050  
0.025  
0.000

0

1

2

3

4

feature #

Fraction of Producers

0.200  
0.175  
0.150  
0.125  
0.100  
0.075  
0.050  
0.025  
0.000

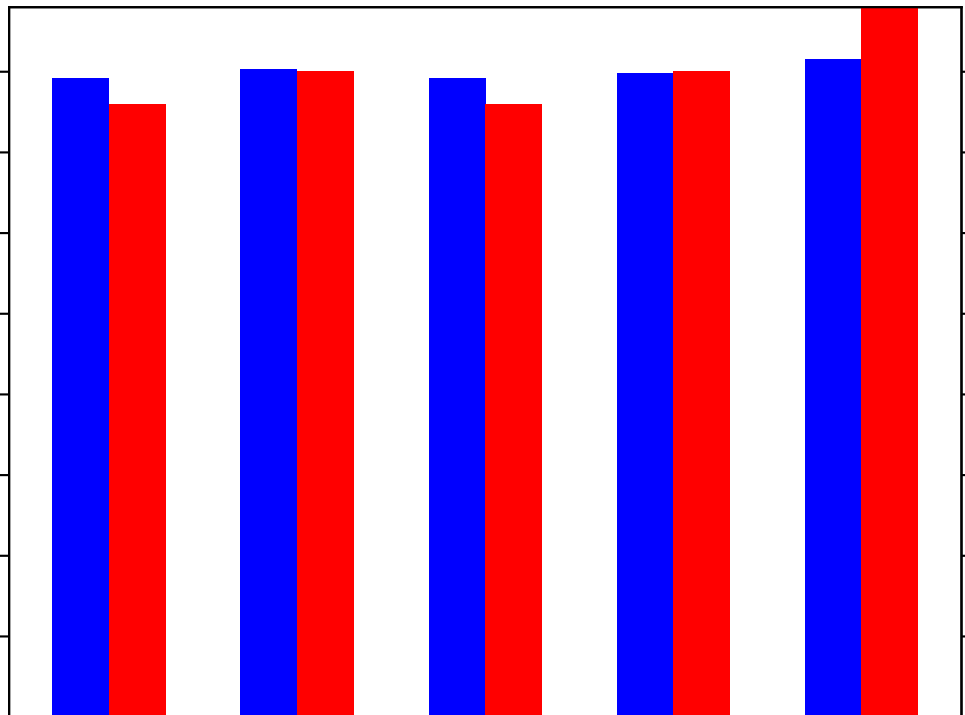

Supplement: supplementary_material [file attachment]

Average User weight

0.5  
0.4  
0.3  
0.2  
0.1  
0.0

0

1

2

3

4

5

6

7

8

9

10

11

12

13

14

feature #

Fraction of Producers

0.5  
0.4  
0.3  
0.2  
0.1  
0.0

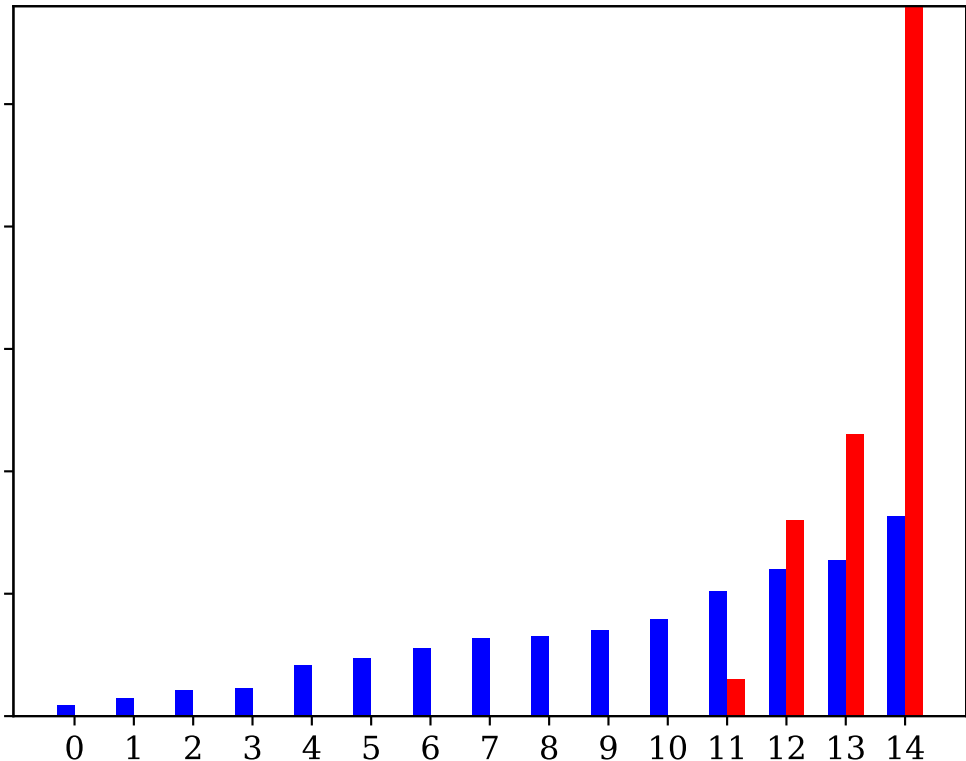

Supplement: supplementary_material [file attachment]

Average User weight

Fraction of Producers

0.35  
0.30  
0.25  
0.20  
0.15  
0.10  
0.05  
0.00

0.35  
0.30  
0.25  
0.20  
0.15  
0.10  
0.05  
0.00

0

1

2

3

4

5

6

7

8

9

feature #

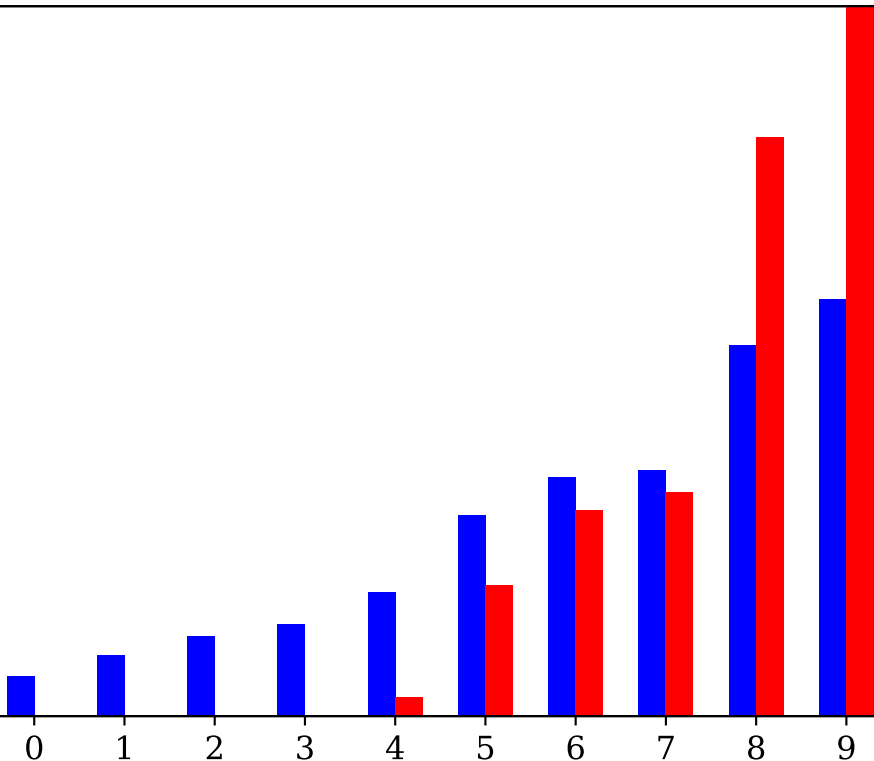

Supplement: supplementary_material [file attachment]

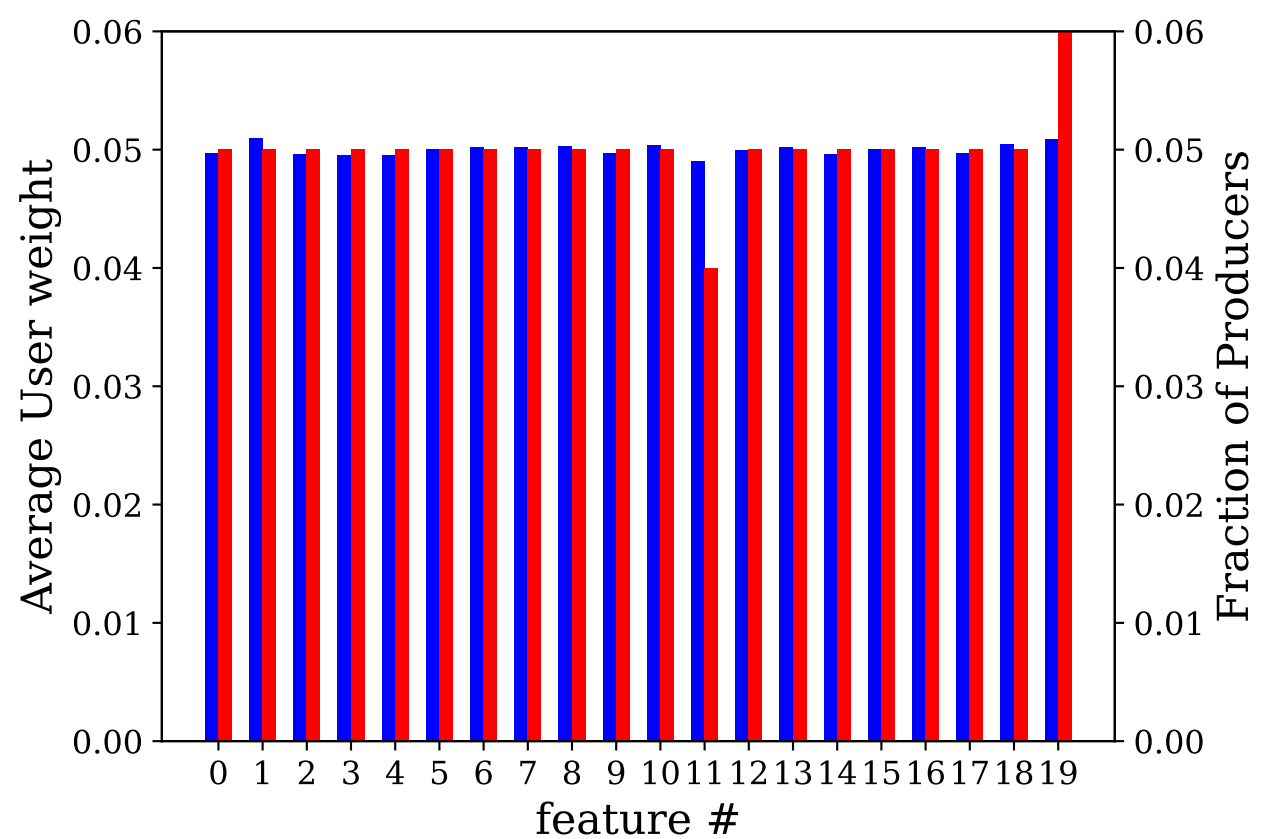

Supplement: supplementary_material [file attachment]

Average user utility

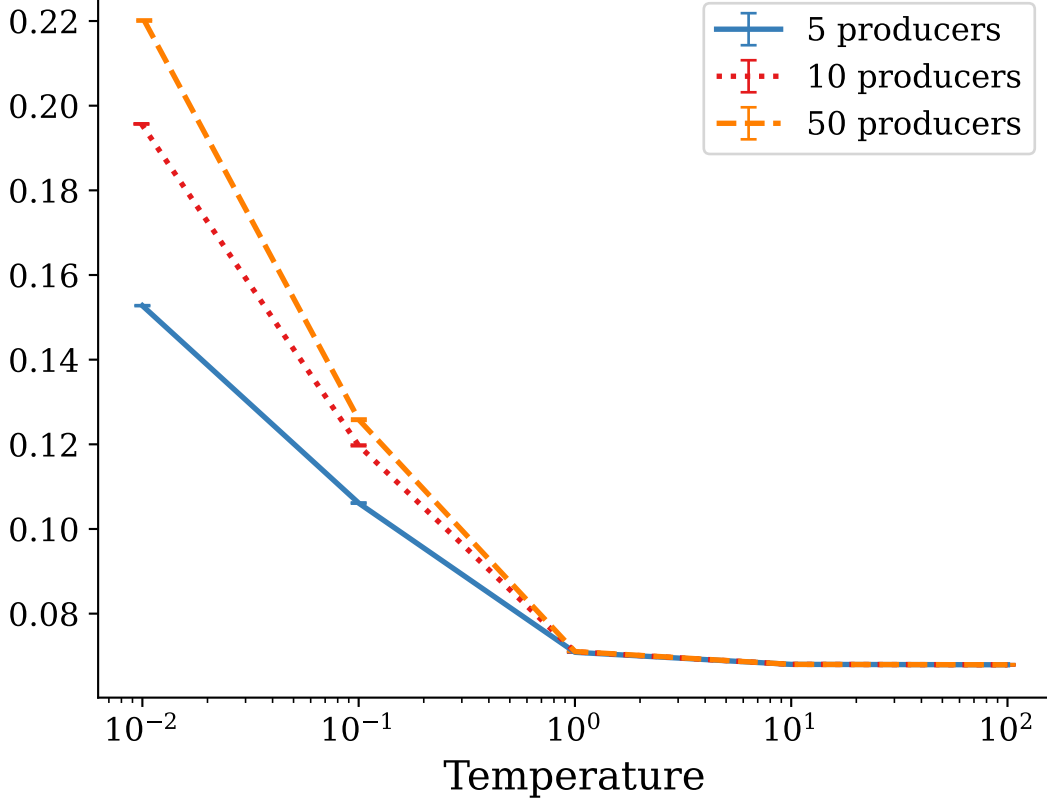

Supplement: supplementary_material [file attachment]

Average User weight

Fraction of Producers

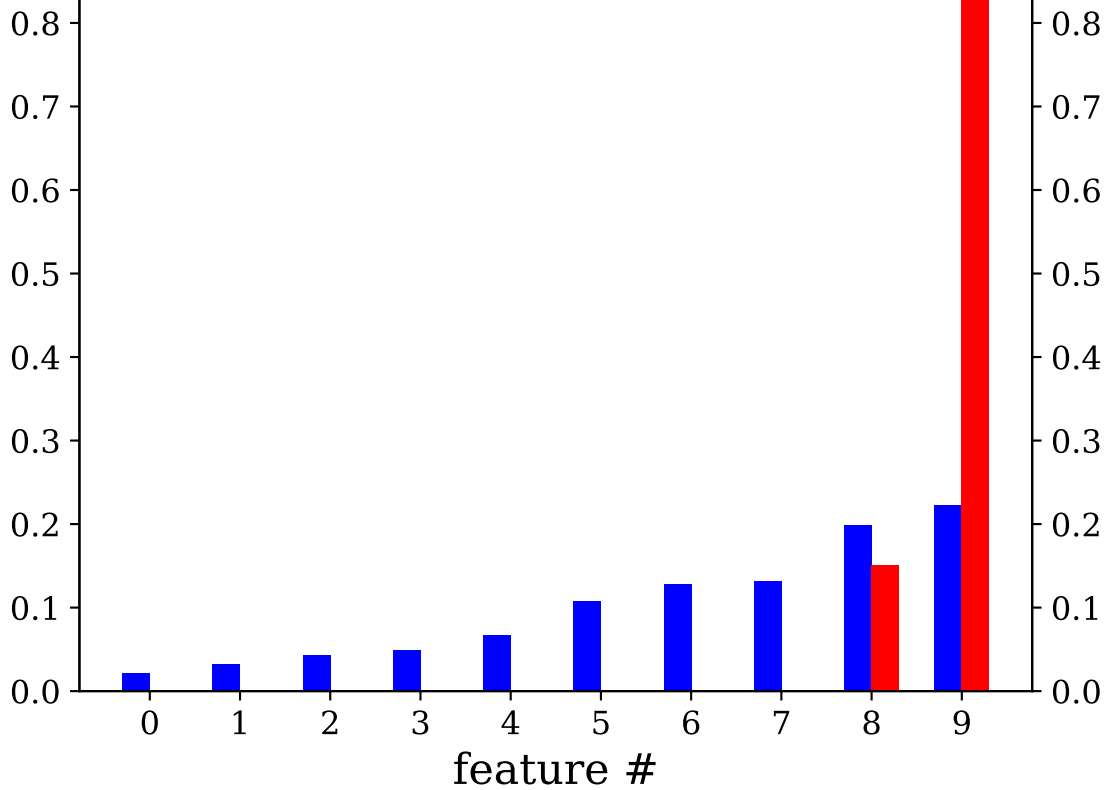

Supplement: supplementary_material [file attachment]

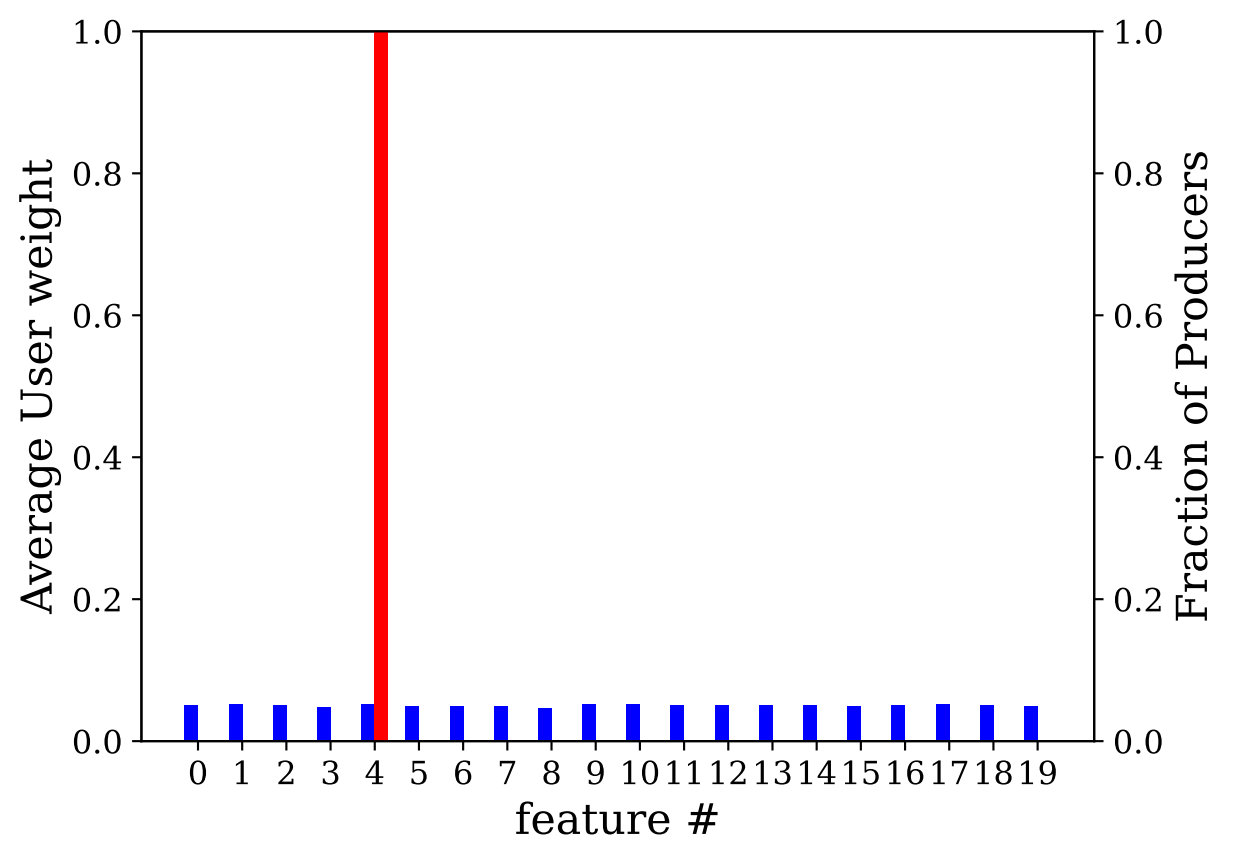

Supplement: supplementary_material [file attachment]

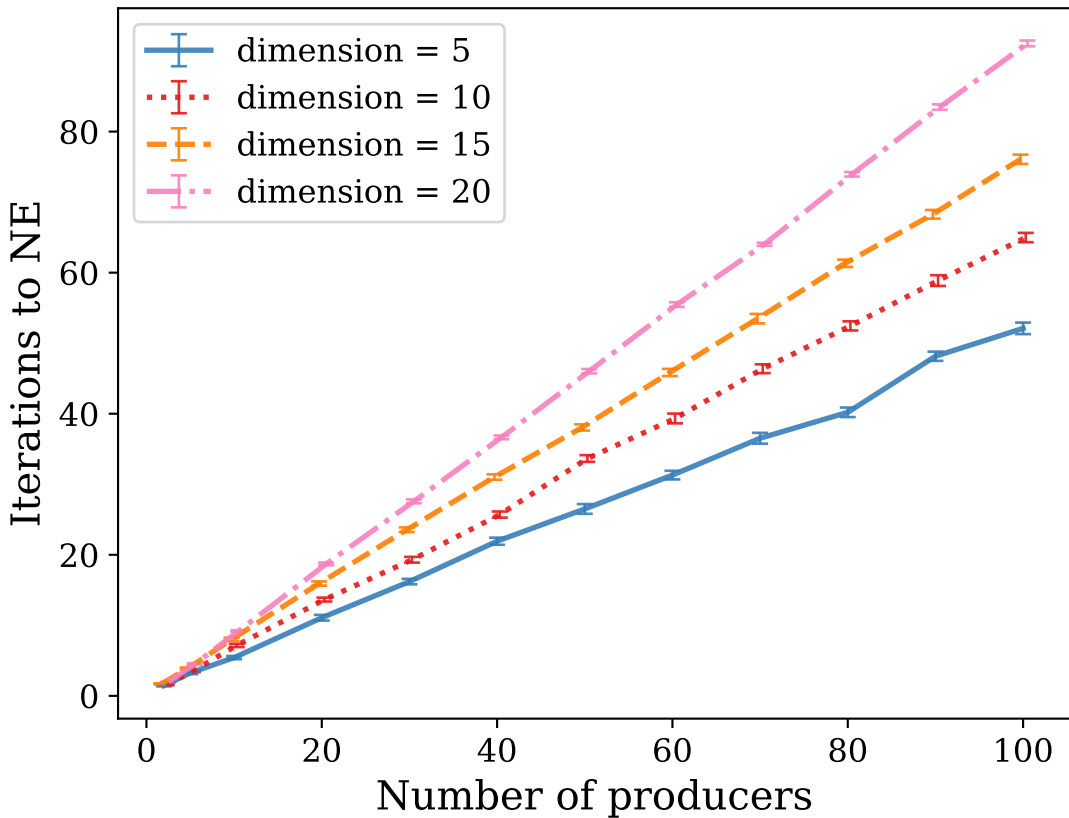

Supplement: supplementary_material [file attachment]
