# Supplementary material (part 2 of 2)
Source: ML conference proceedings conference paper supplement (https://openreview.net/forum?id=EWT4GxjGDS)

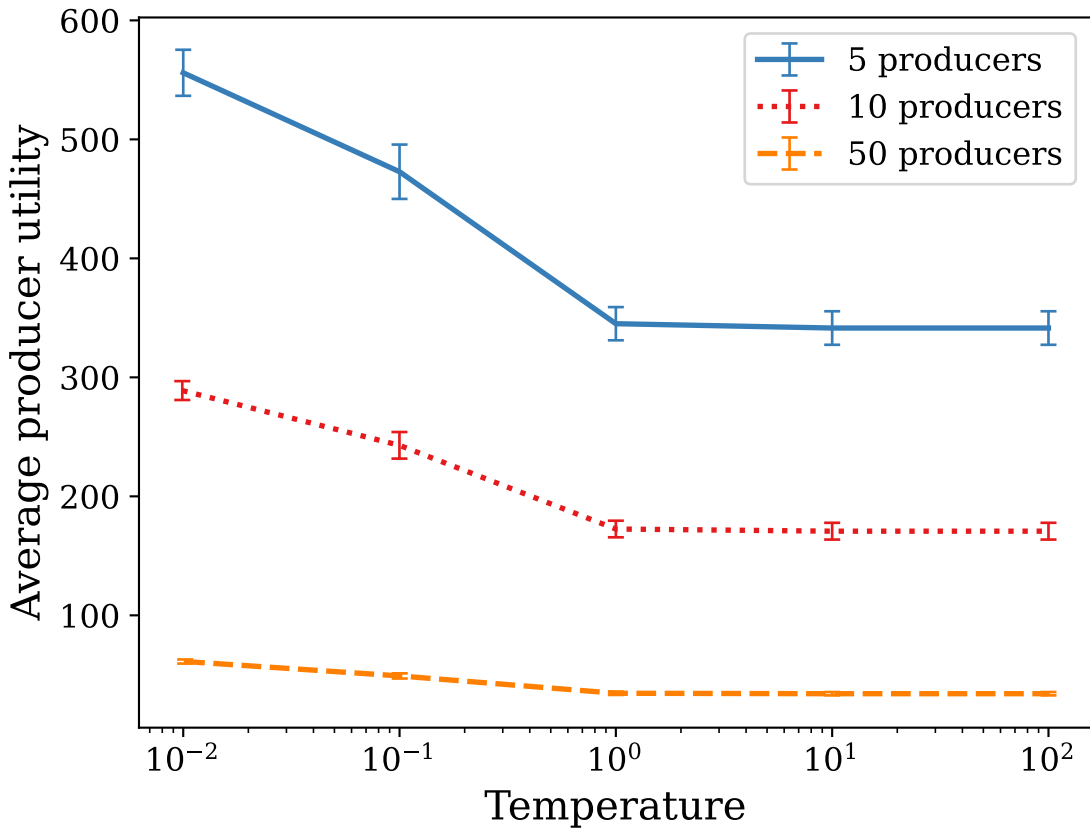

Supplement: supplementary_material [file attachment]

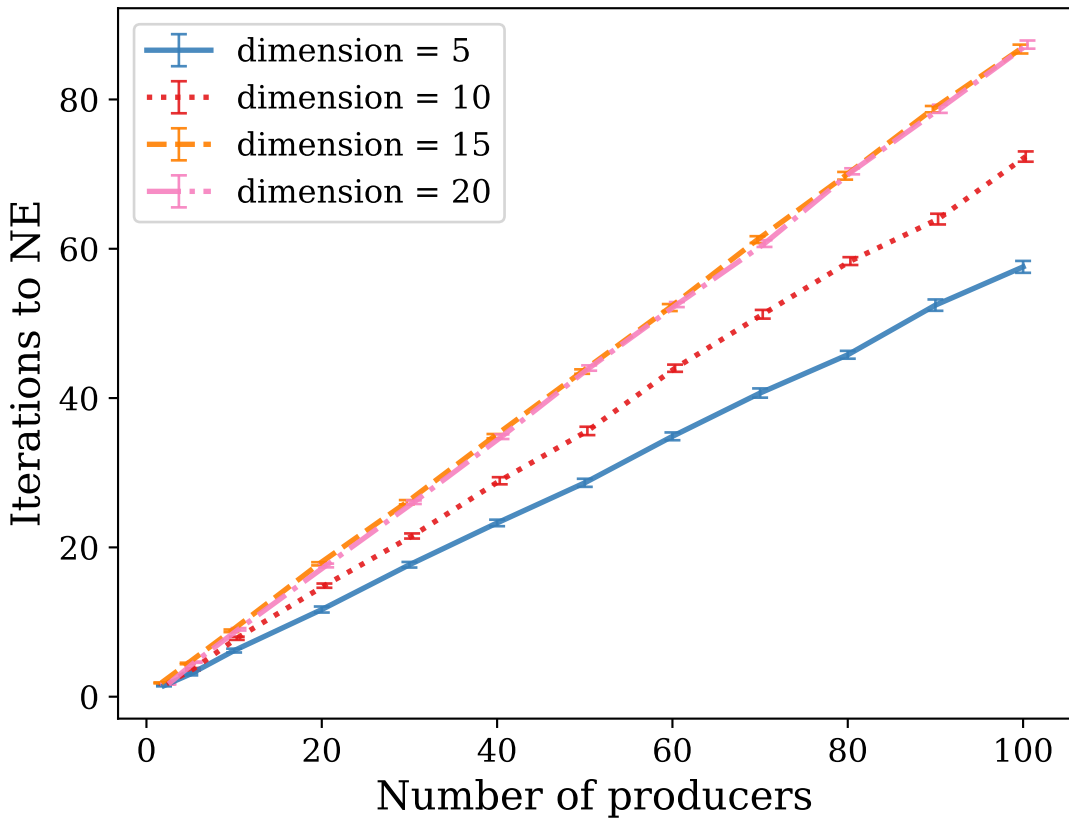

Supplement: supplementary_material [file attachment]

Average user utility

- 50 producers, linear
- 50 producers, softmax

Temperature

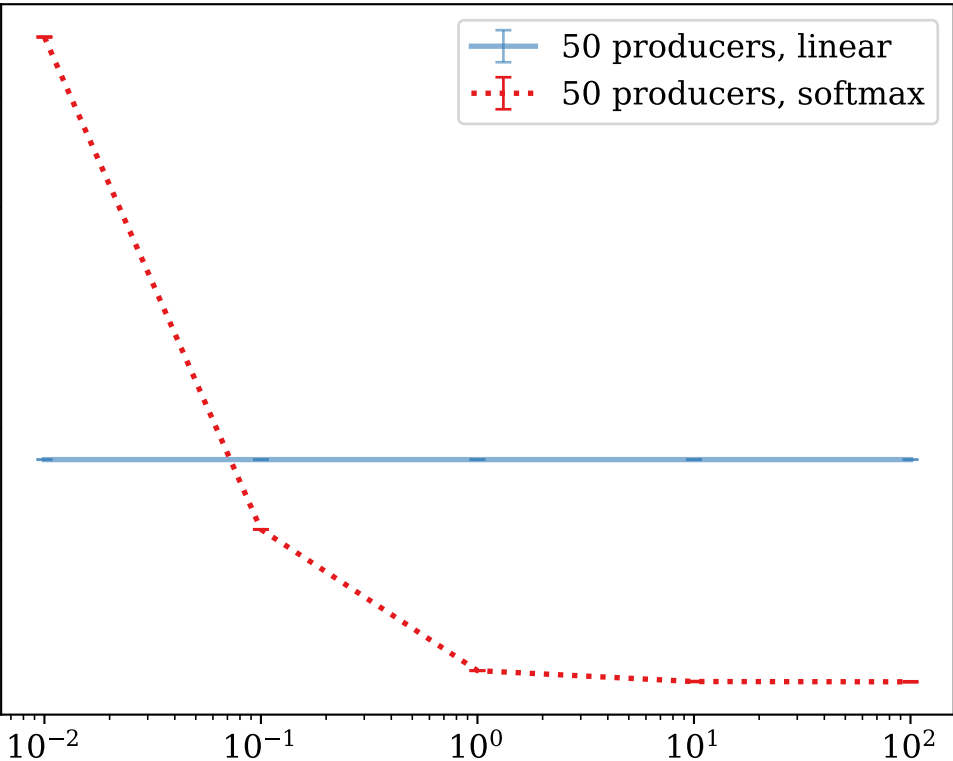

Supplement: supplementary_material [file attachment]

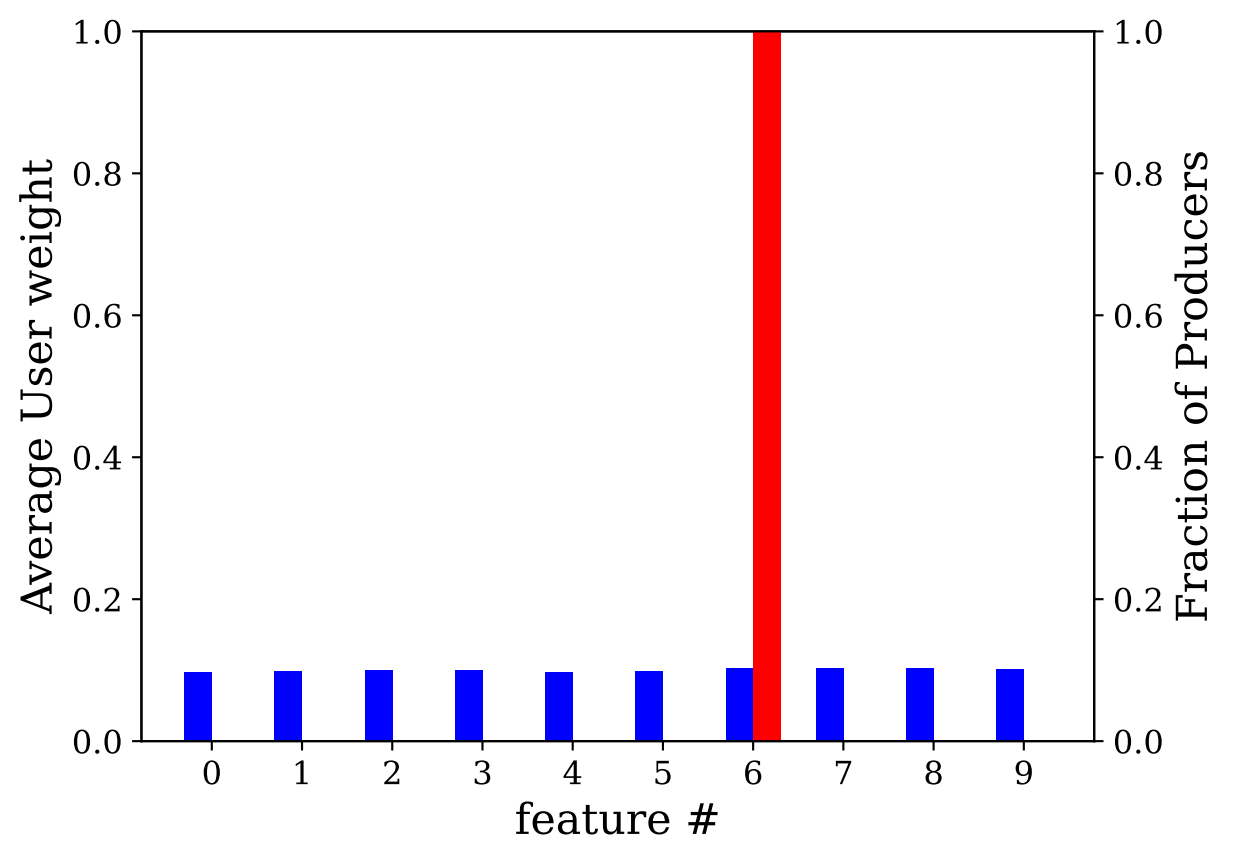

Supplement: supplementary_material [file attachment]

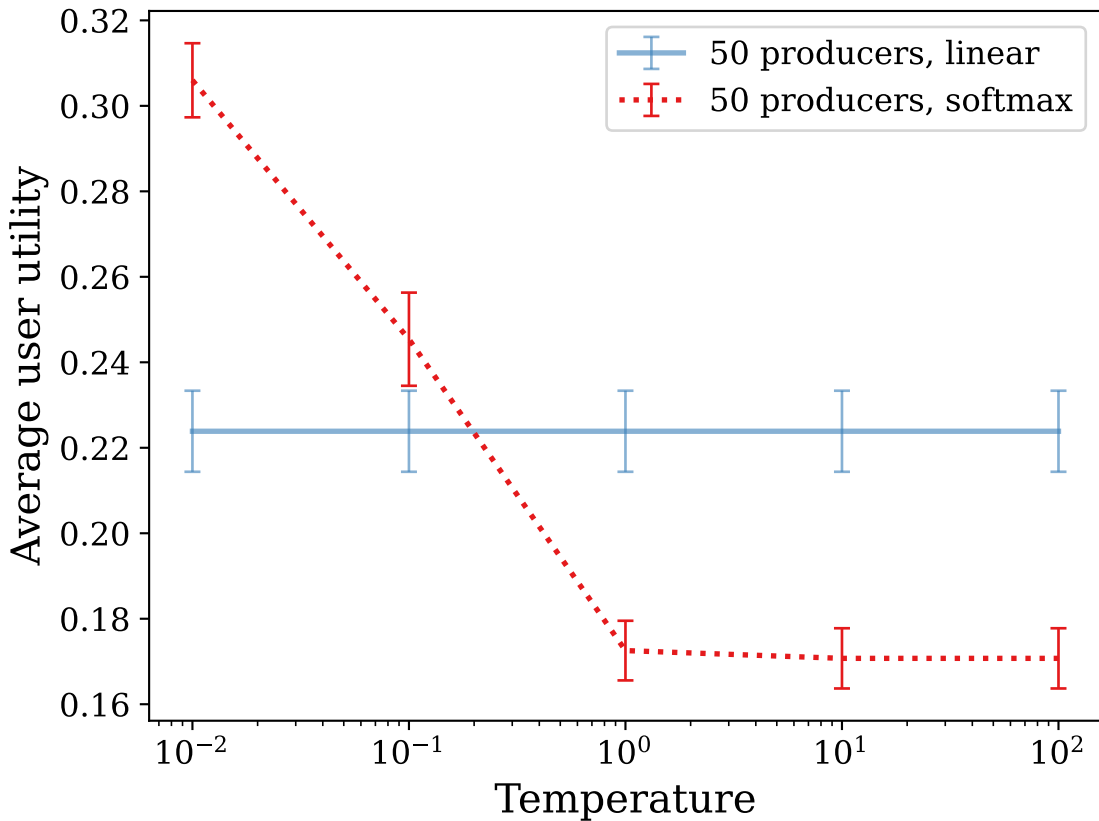

Supplement: supplementary_material [file attachment]

Iterations to NE

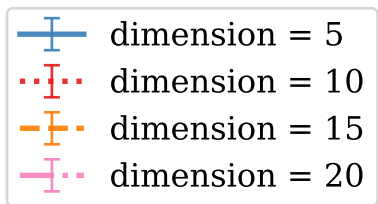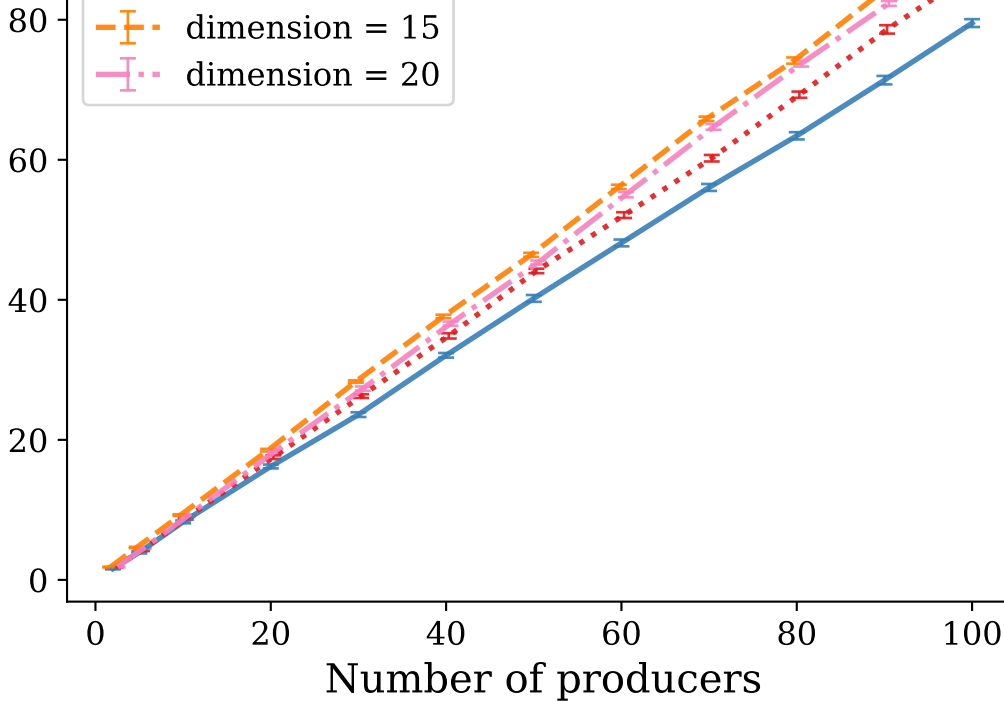

Supplement: supplementary_material [file attachment]

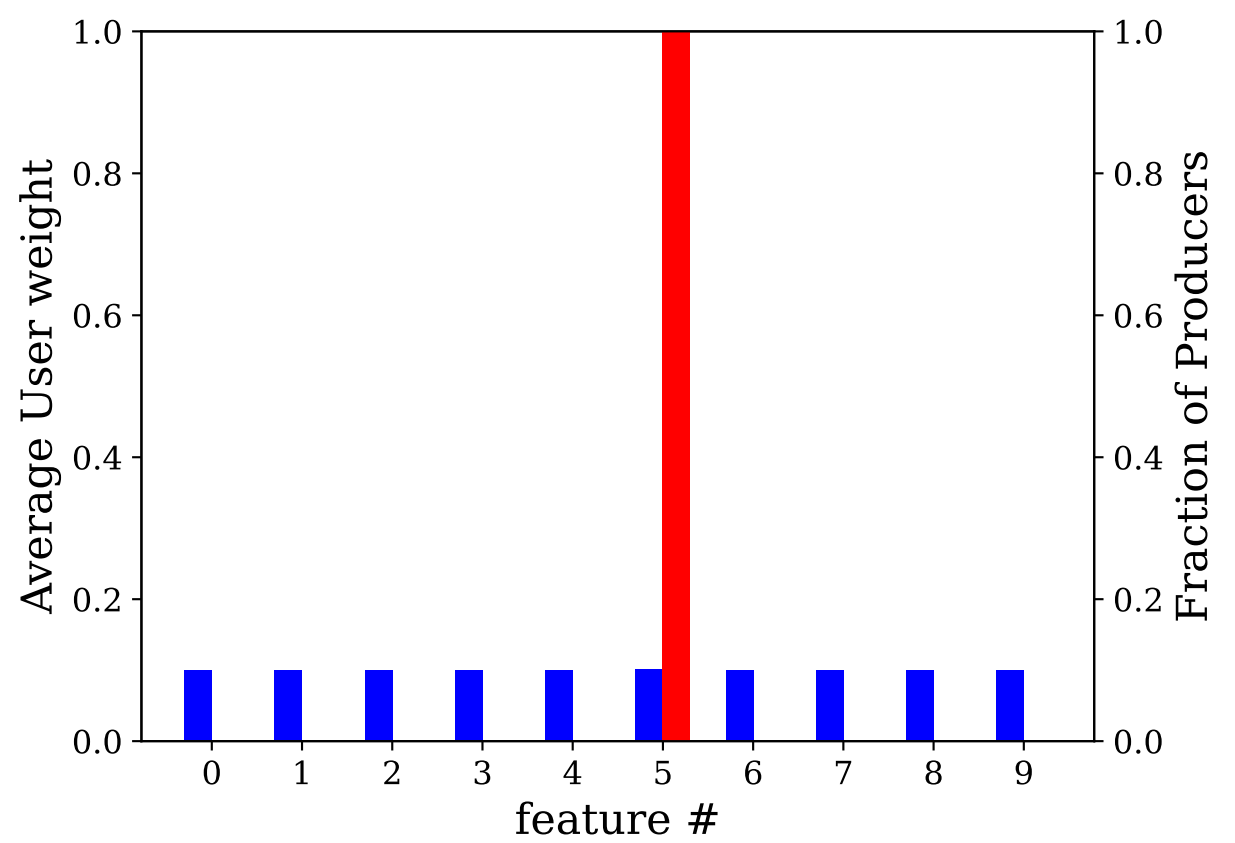

Supplement: supplementary_material [file attachment]

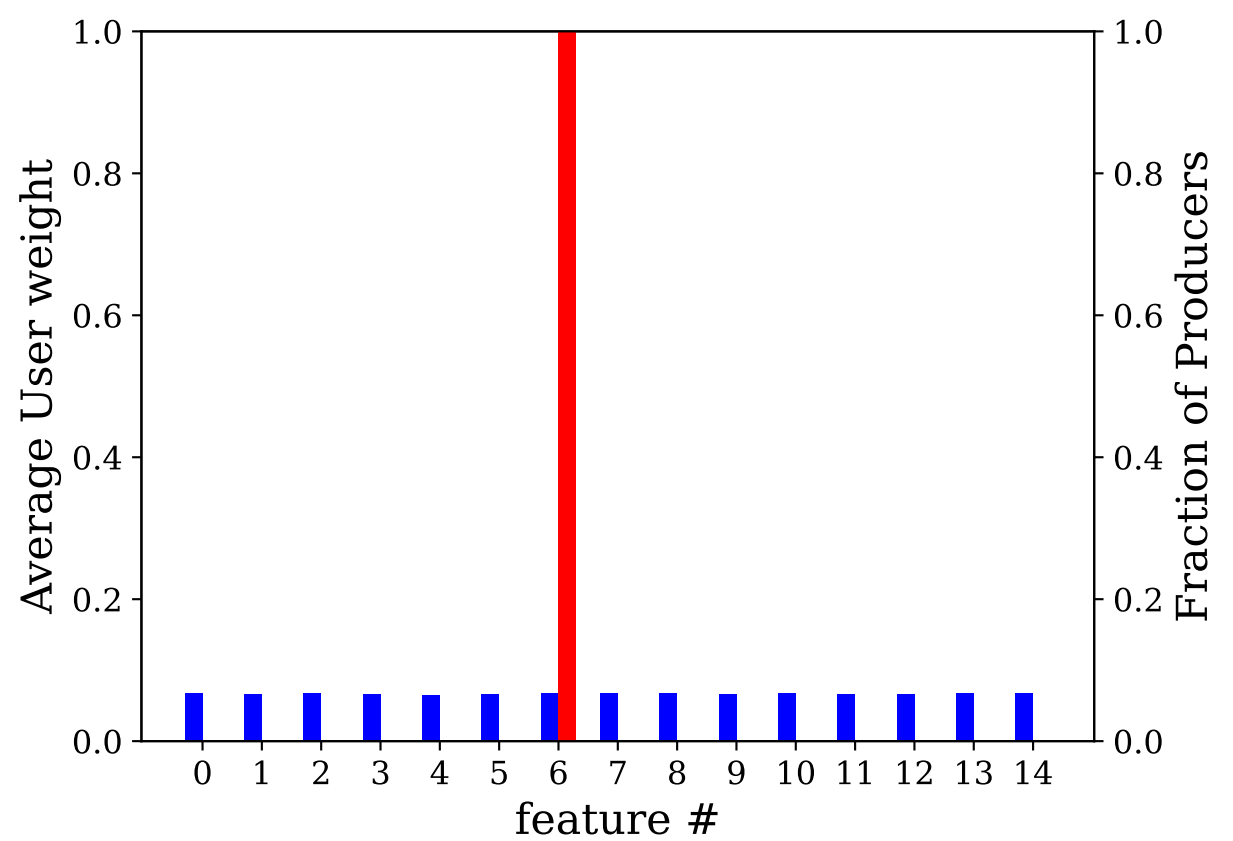

Supplement: supplementary_material [file attachment]

Average User weight

Fraction of Producers

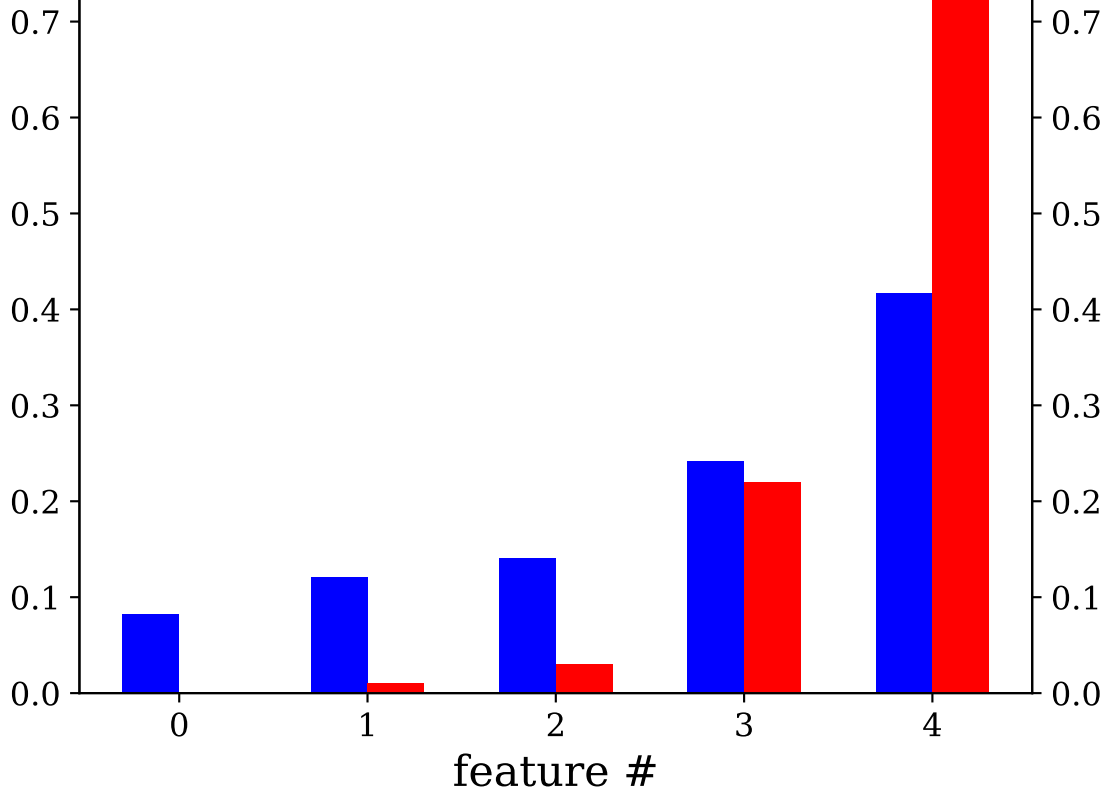

Supplement: supplementary_material [file attachment]

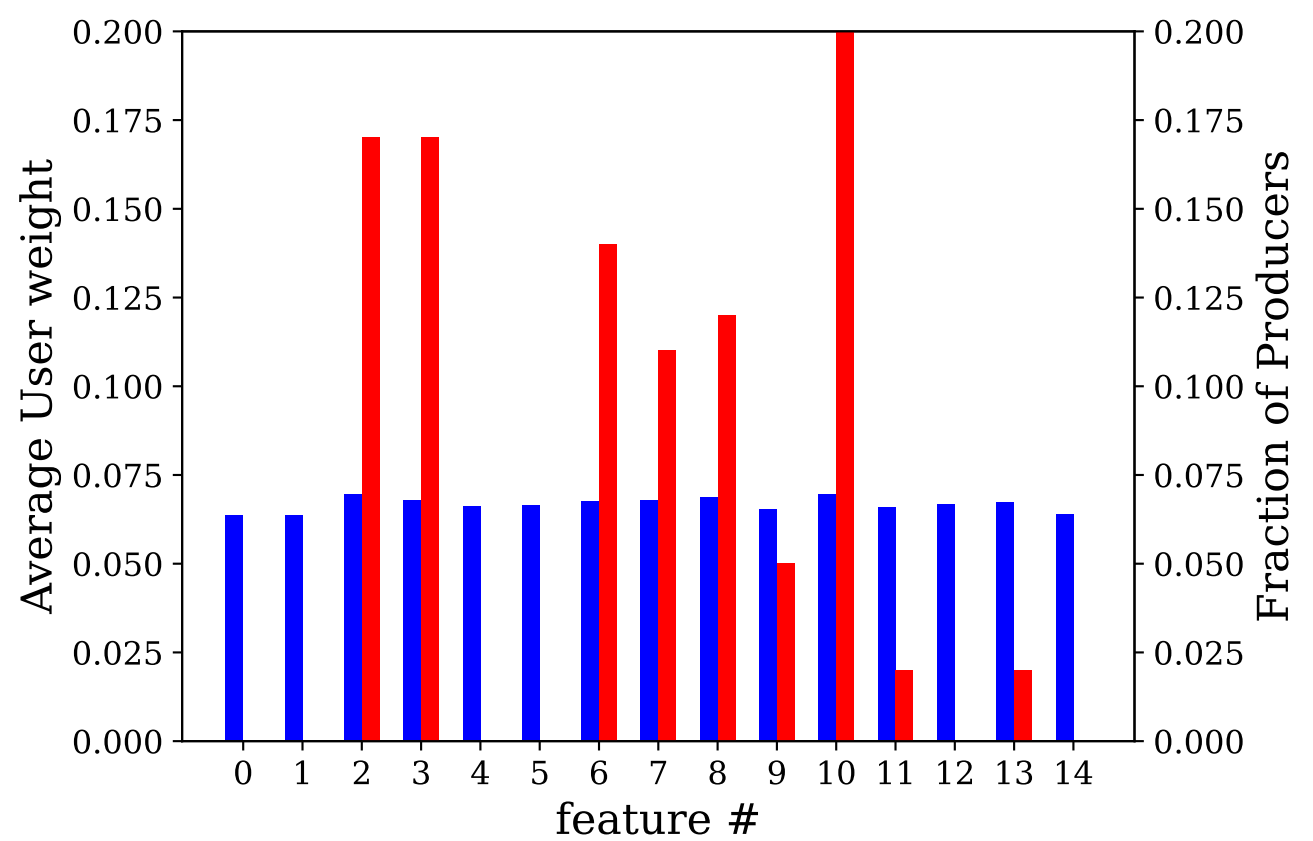

Supplement: supplementary_material [file attachment]

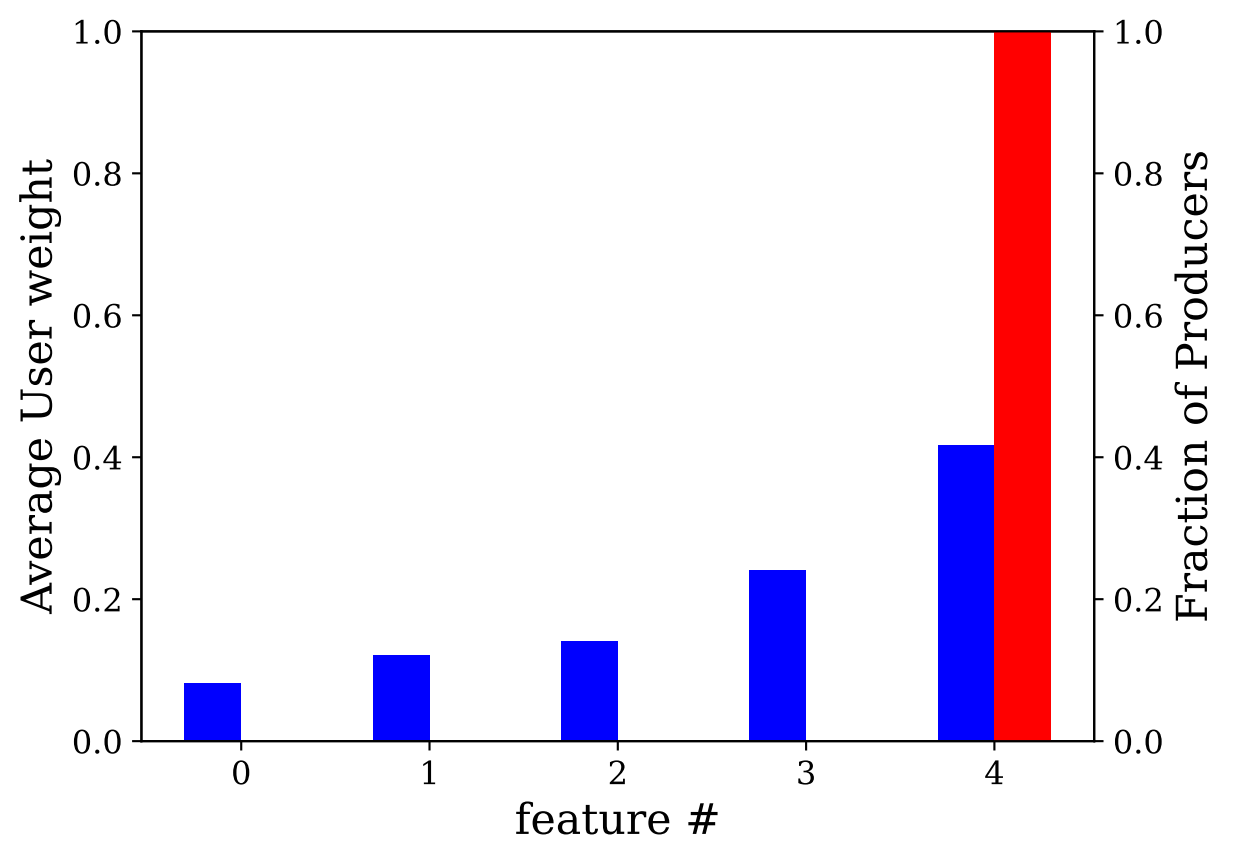

Supplement: supplementary_material [file attachment]

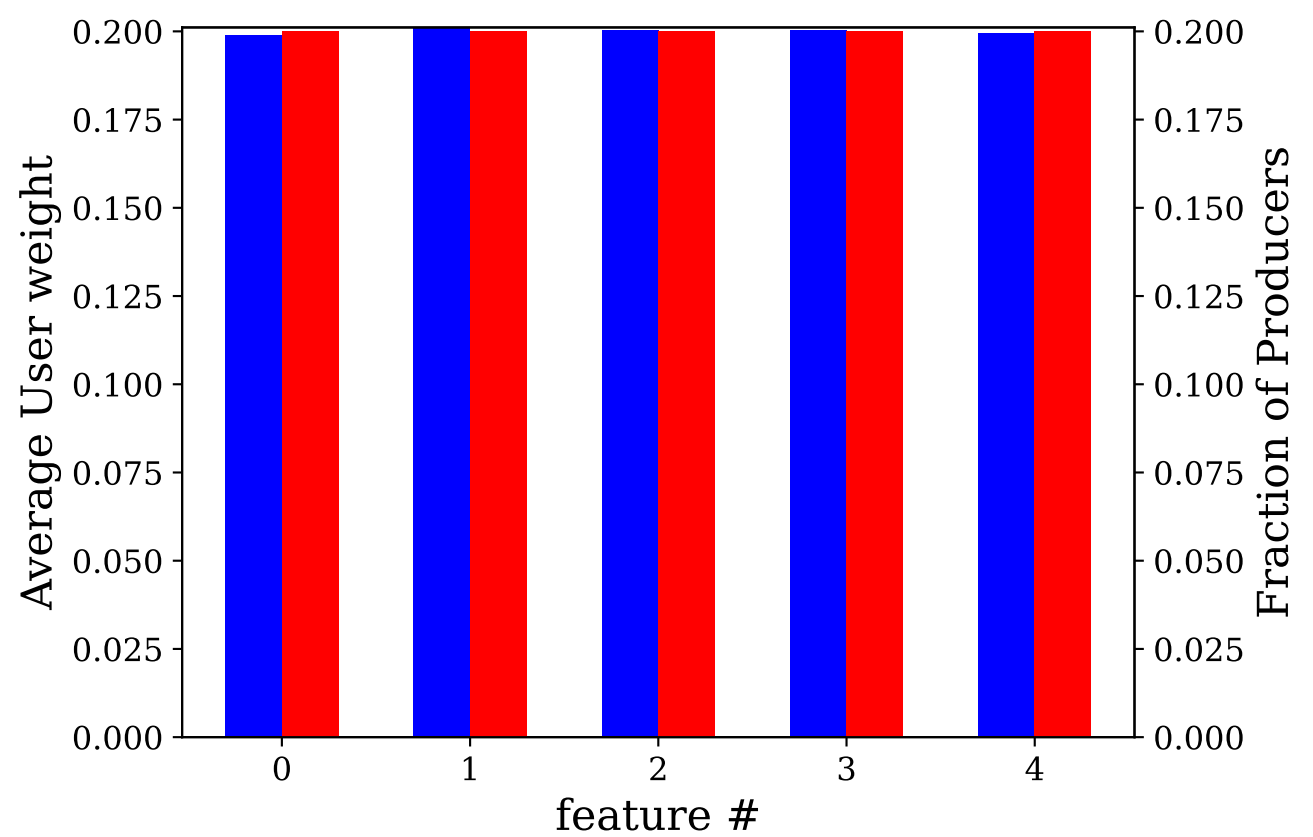

Supplement: supplementary_material [file attachment]

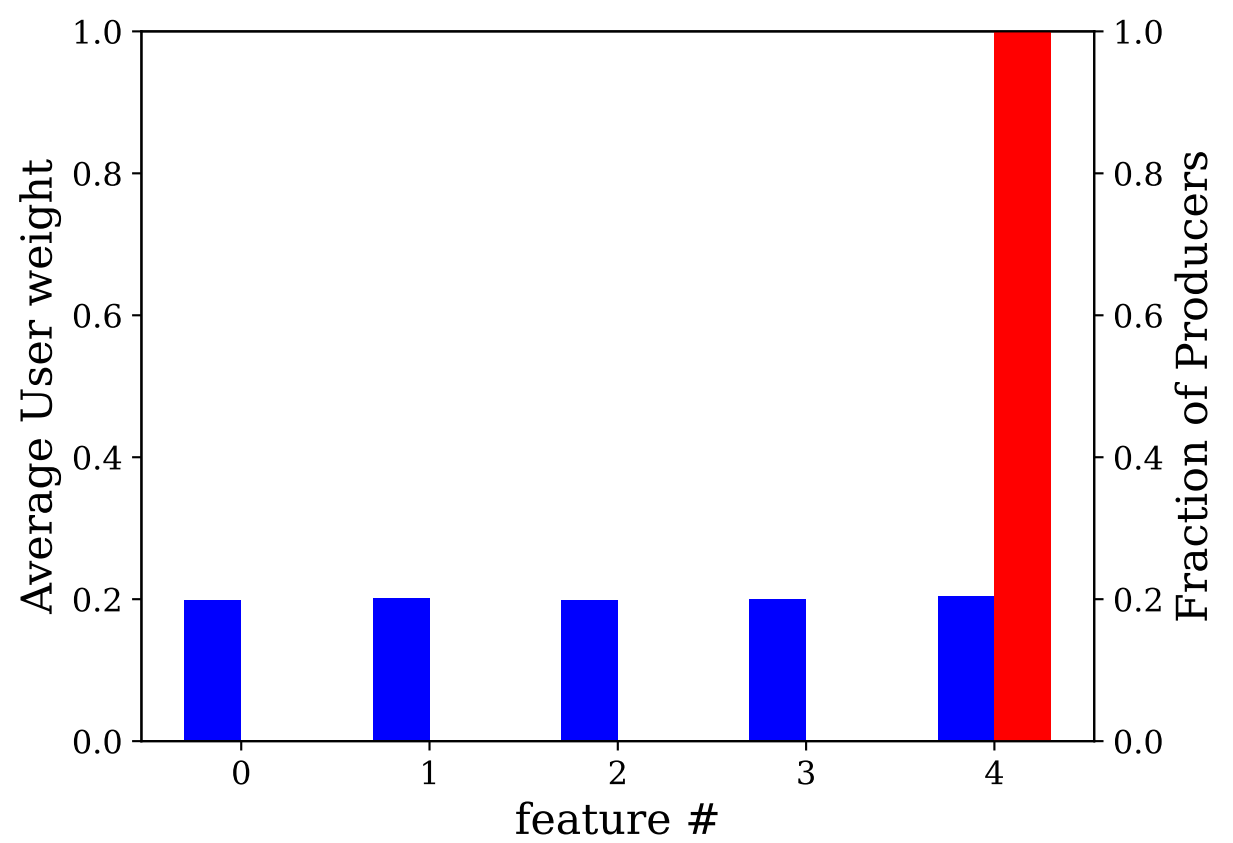

Supplement: supplementary_material [file attachment]

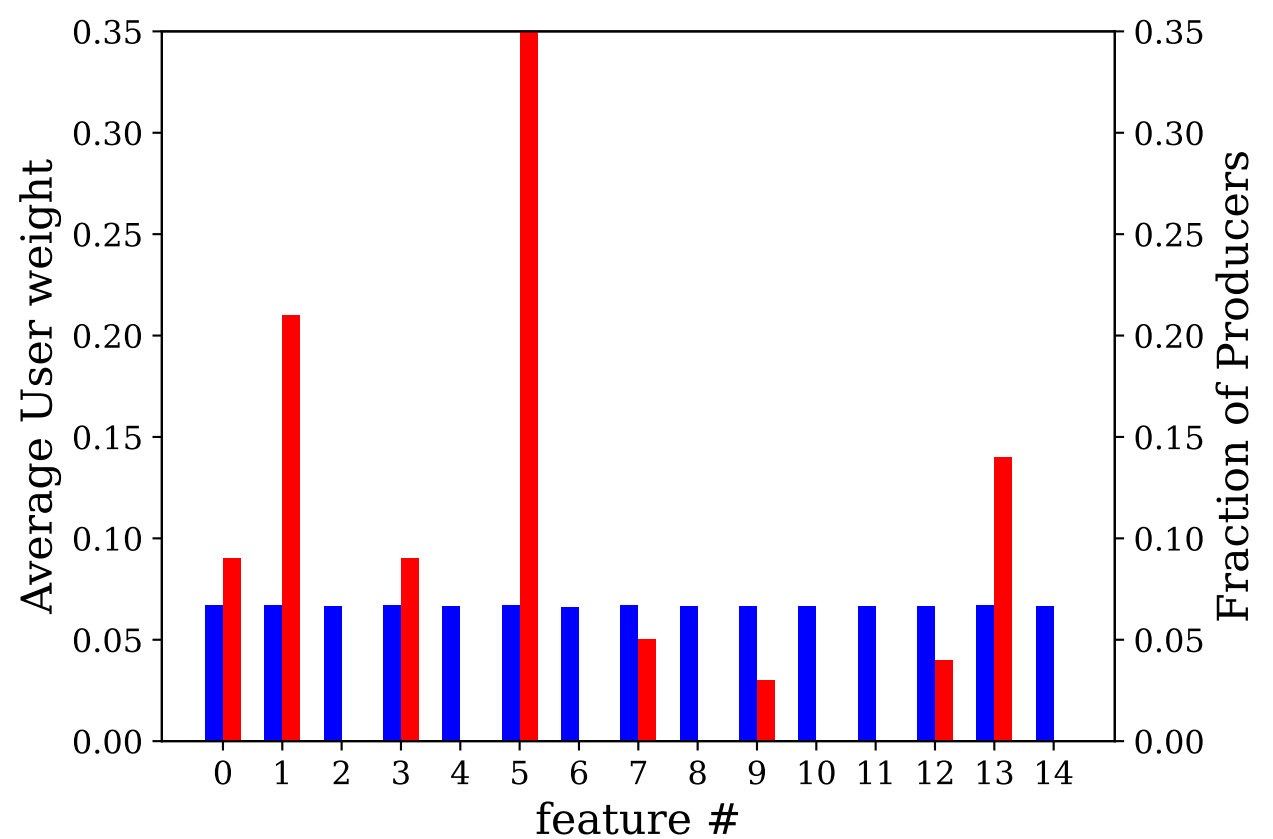

Supplement: supplementary_material [file attachment]

Average User weight

Fraction of Producers

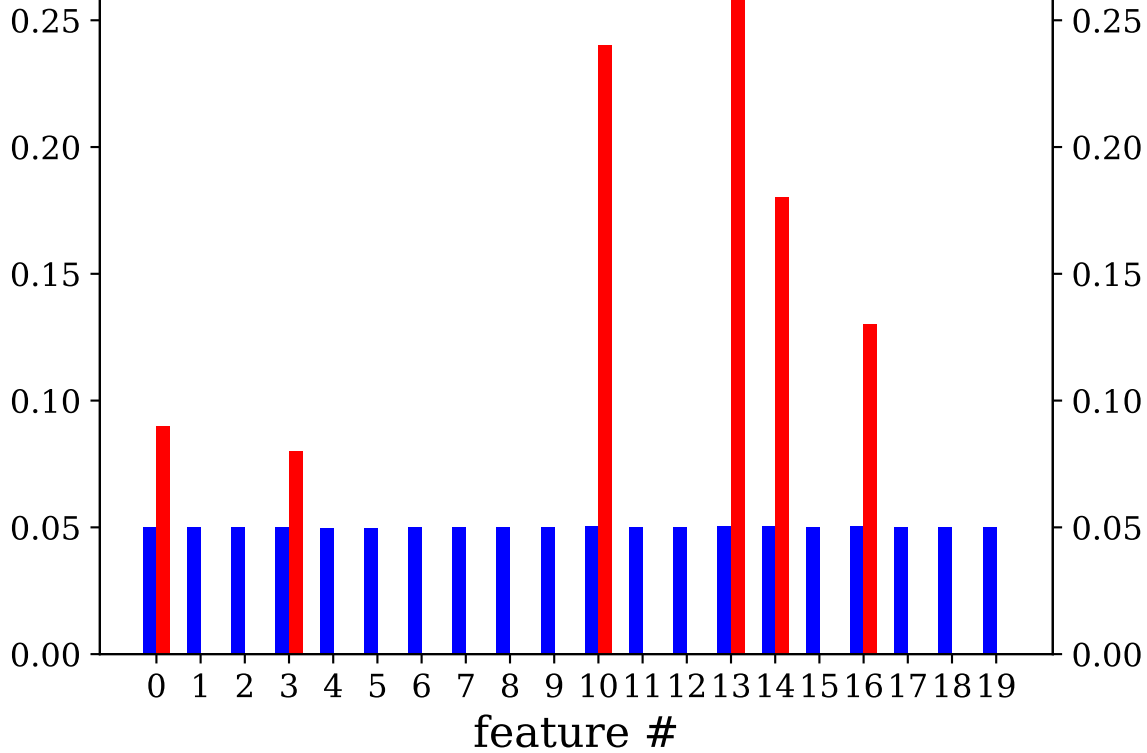

Supplement: supplementary_material [file attachment]

Average User weight

Fraction of Producers

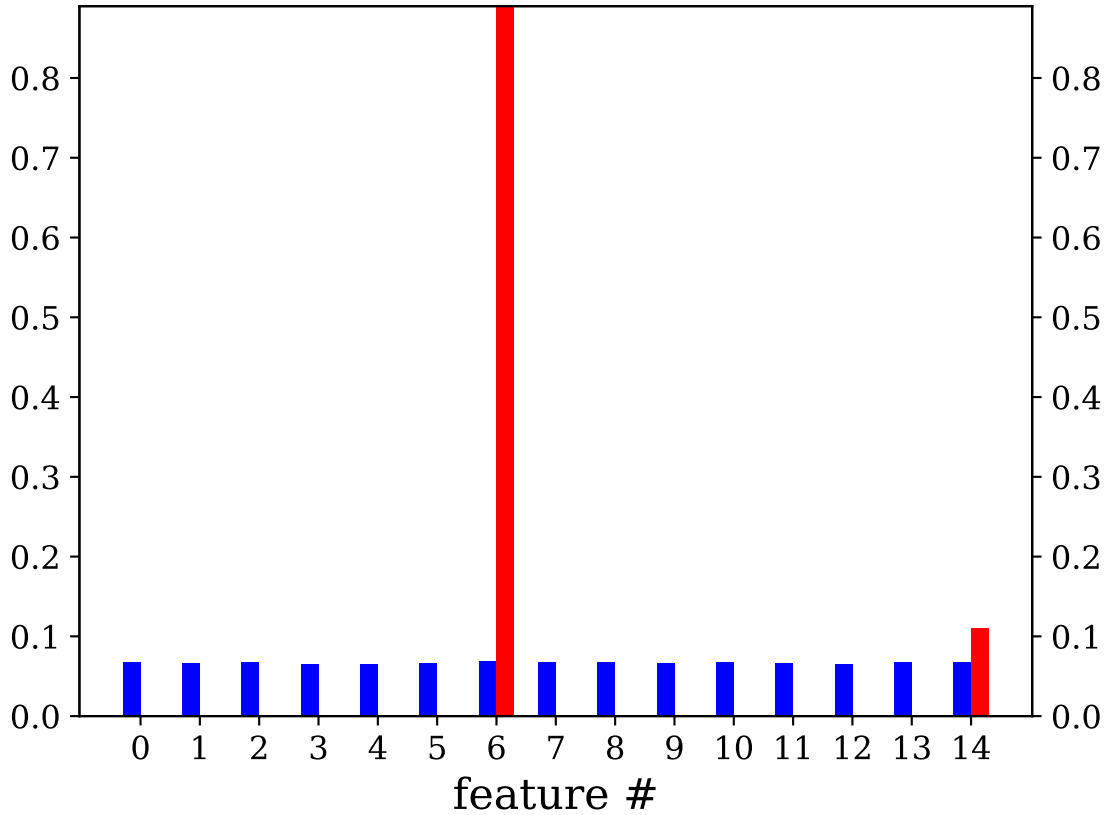

Supplement: supplementary_material [file attachment]

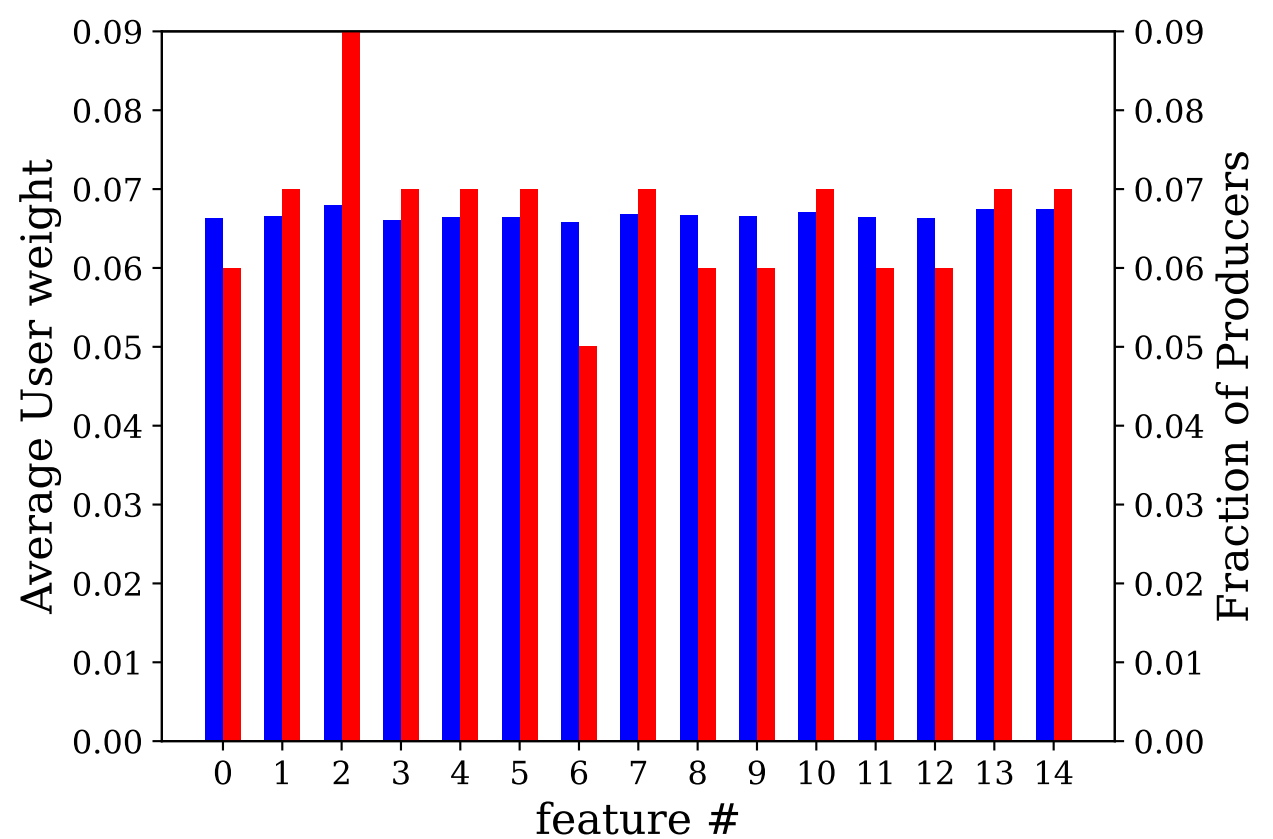

Supplement: supplementary_material [file attachment]

Average User weight

Fraction of Producers

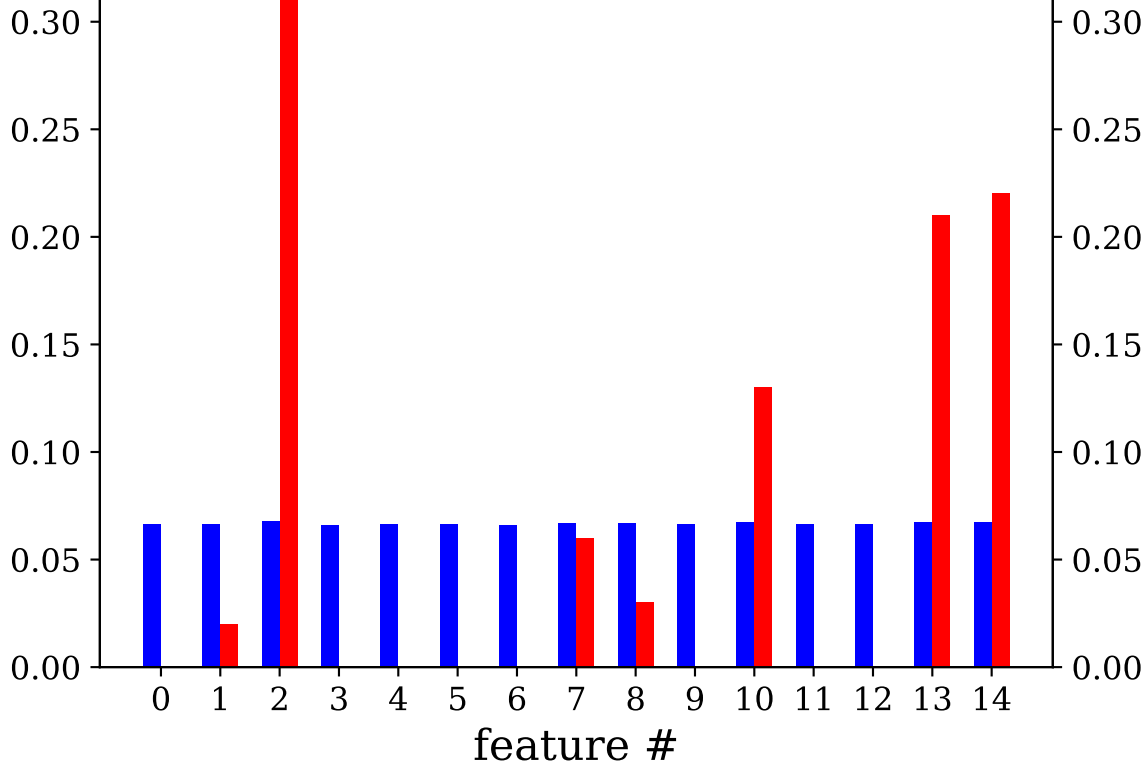

Supplement: supplementary_material [file attachment]

Average User weight

Fraction of Producers

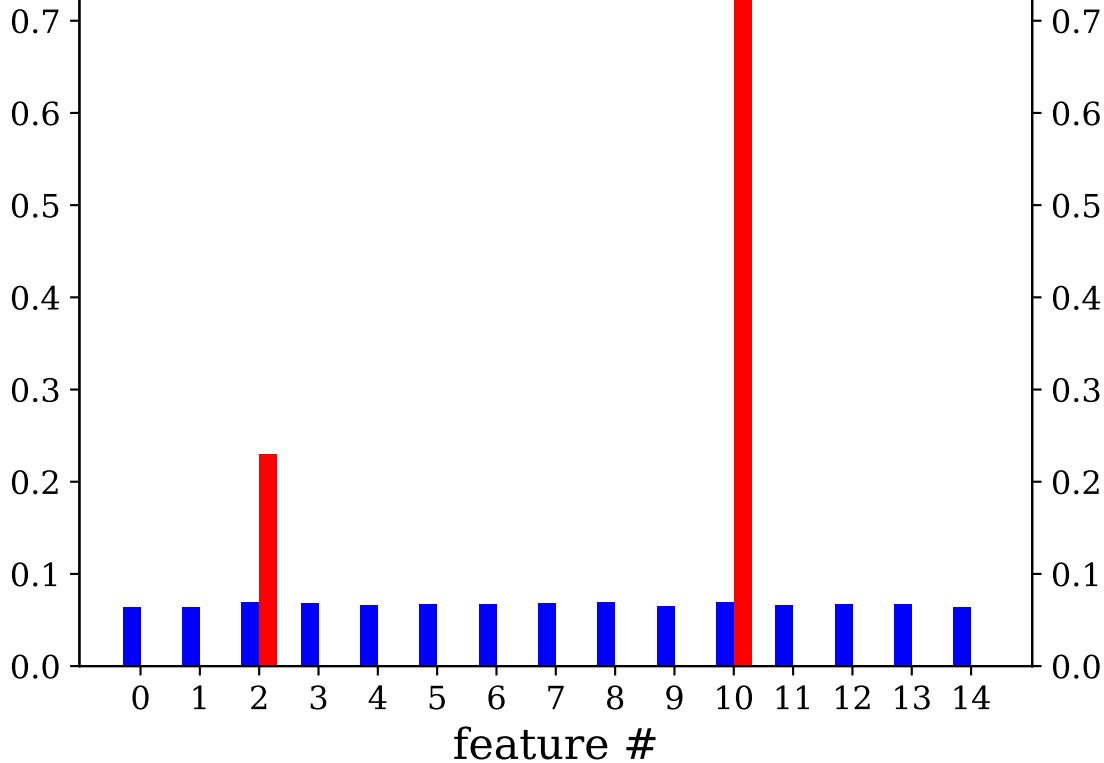

Supplement: supplementary_material [file attachment]

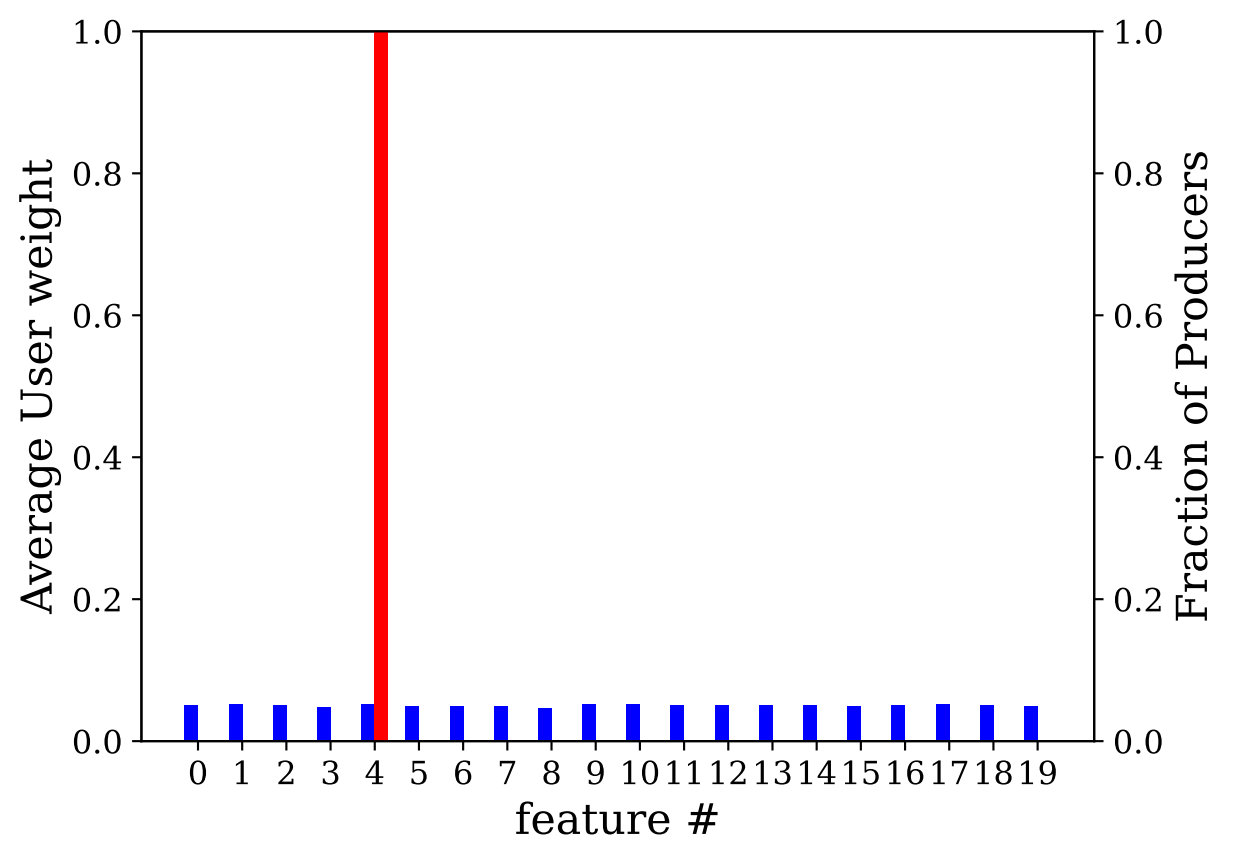

Supplement: supplementary_material [file attachment]

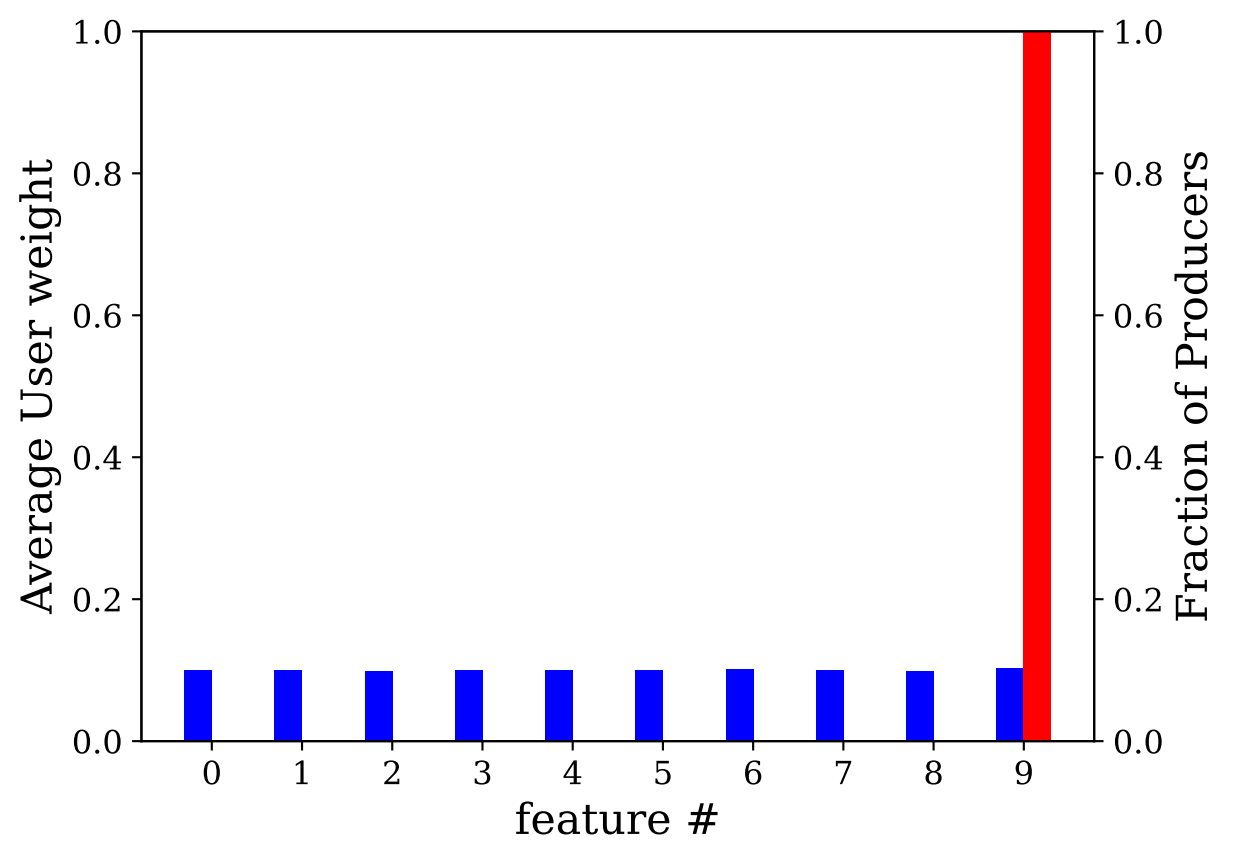

Supplement: supplementary_material [file attachment]

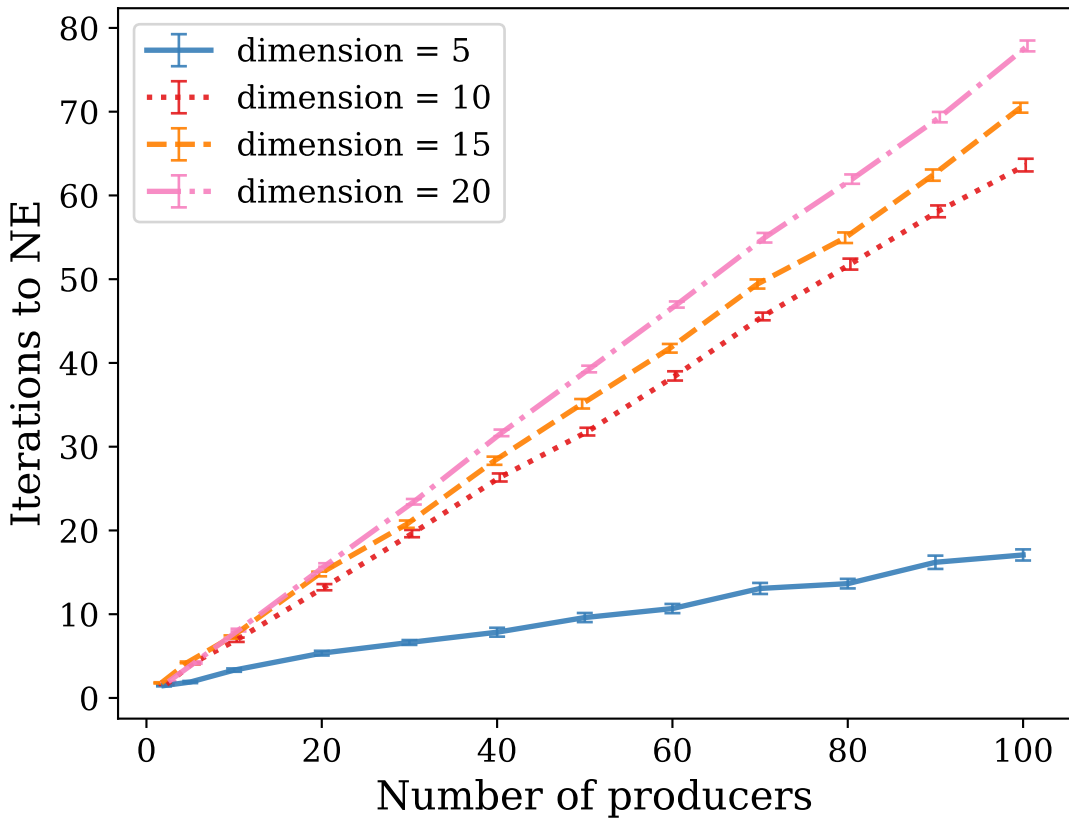

Supplement: supplementary_material [file attachment]

Average User weight

Fraction of Producers

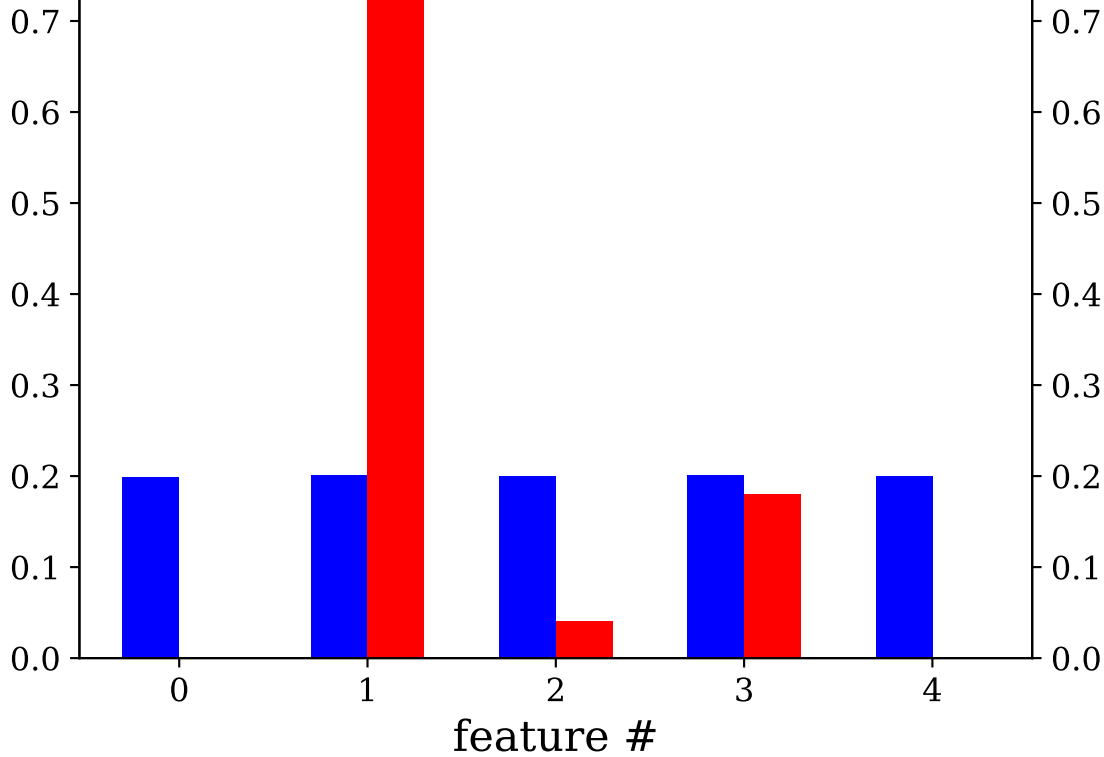

Supplement: supplementary_material [file attachment]

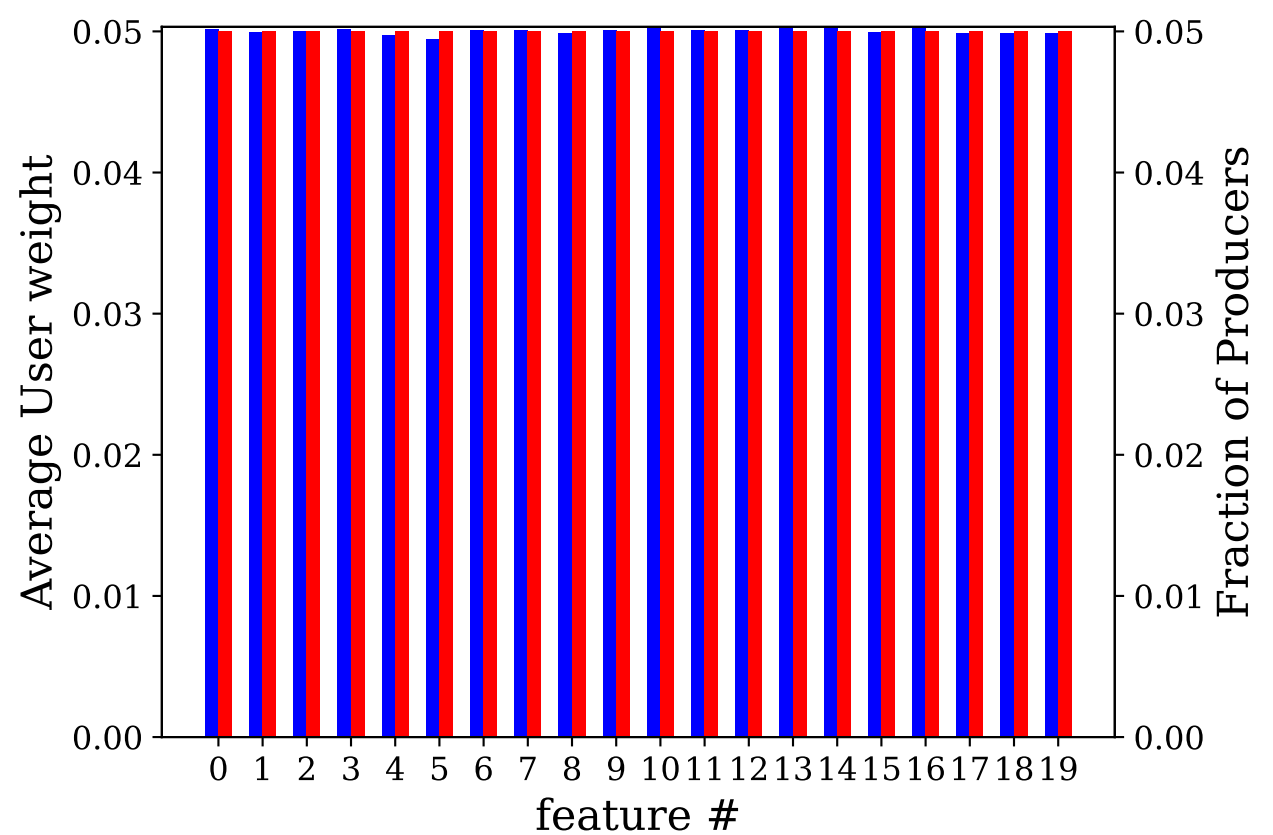

Supplement: supplementary_material [file attachment]

Average User weight

Fraction of Producers

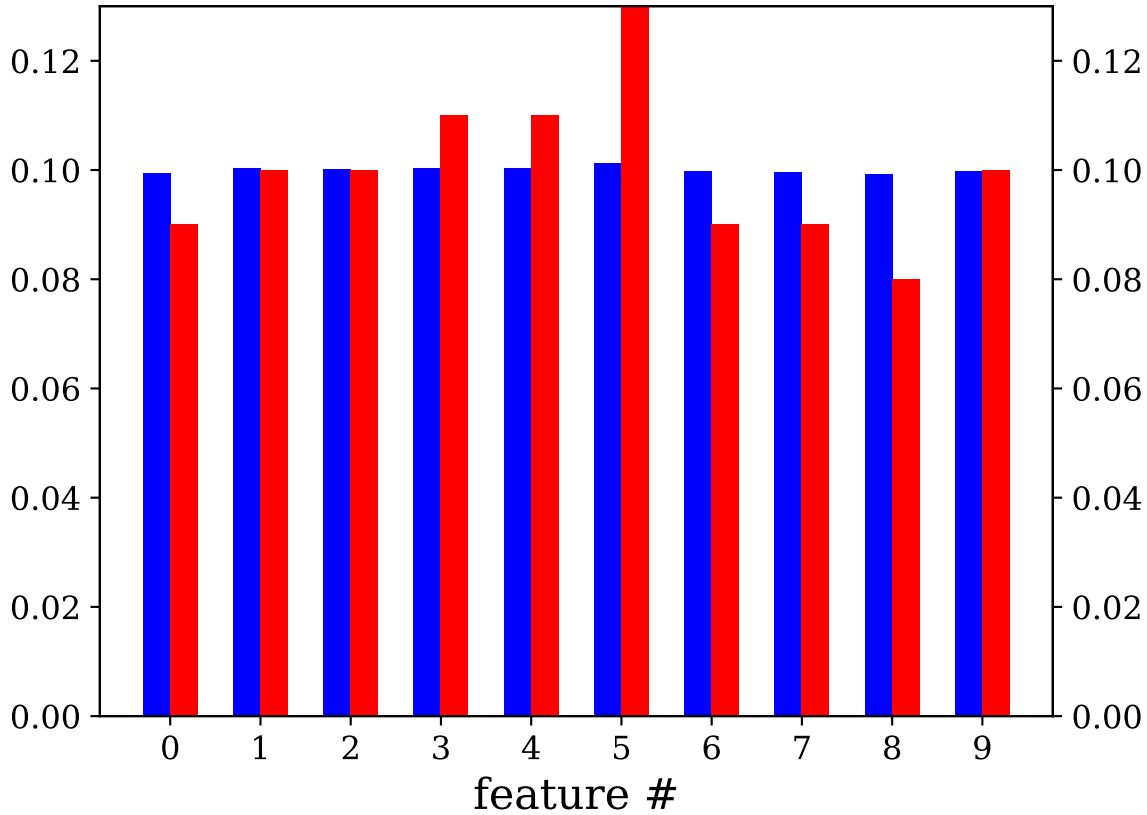

Supplement: supplementary_material [file attachment]

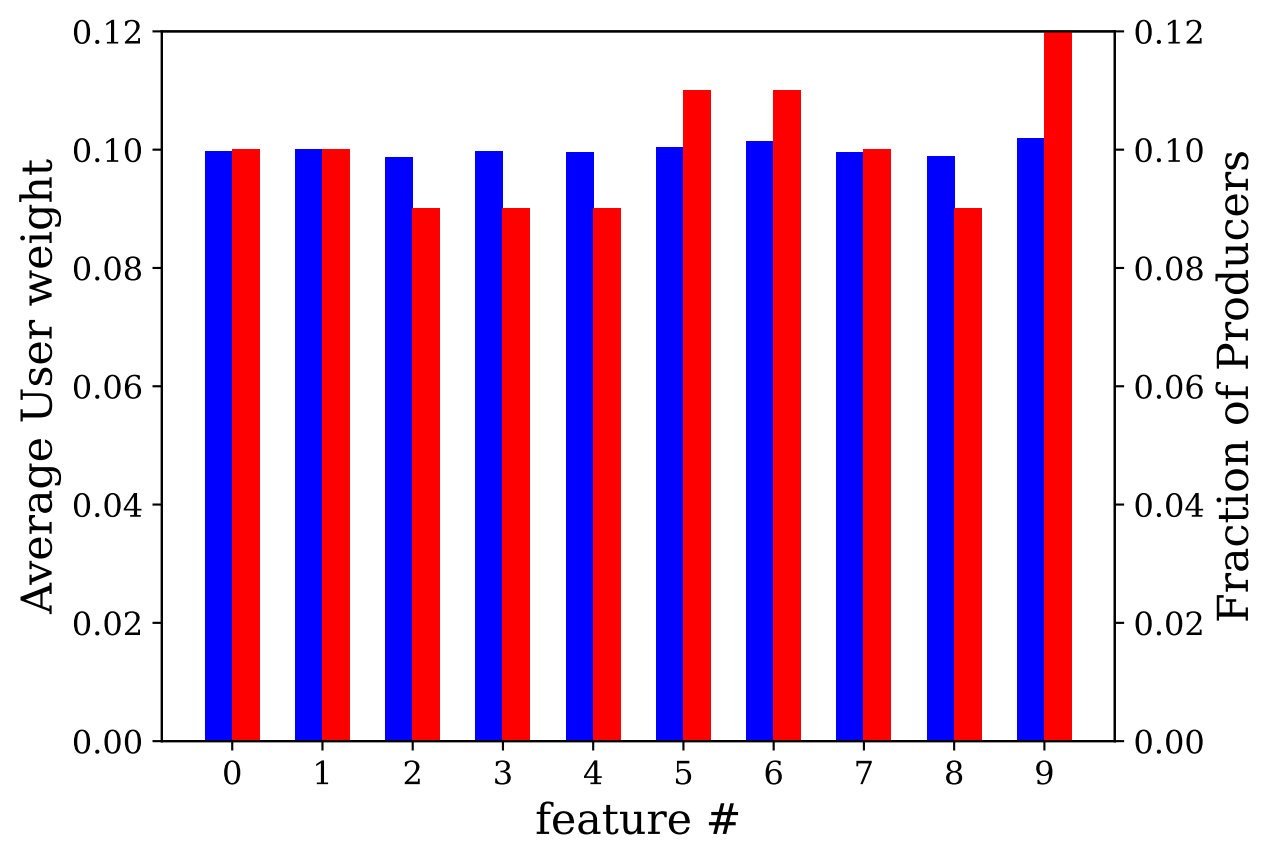

Supplement: supplementary_material [file attachment]

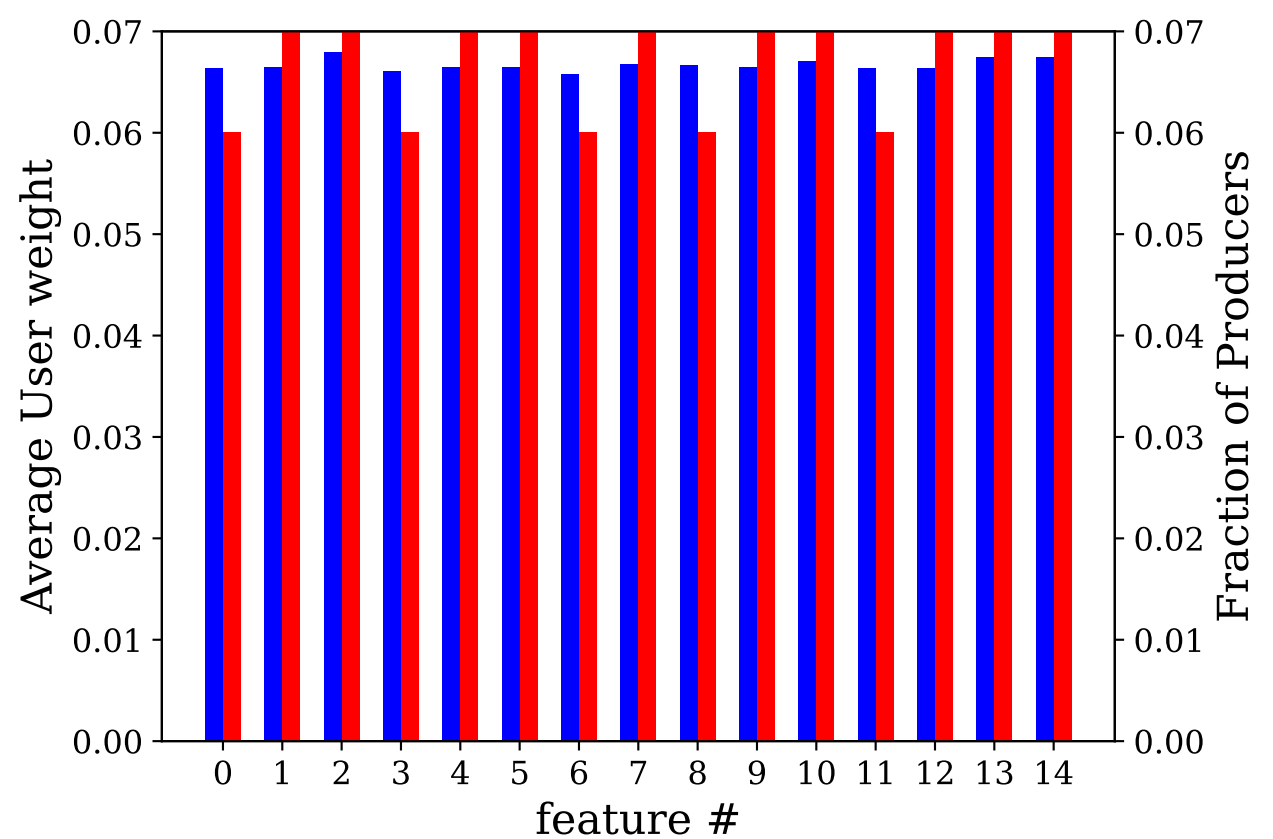

Supplement: supplementary_material [file attachment]

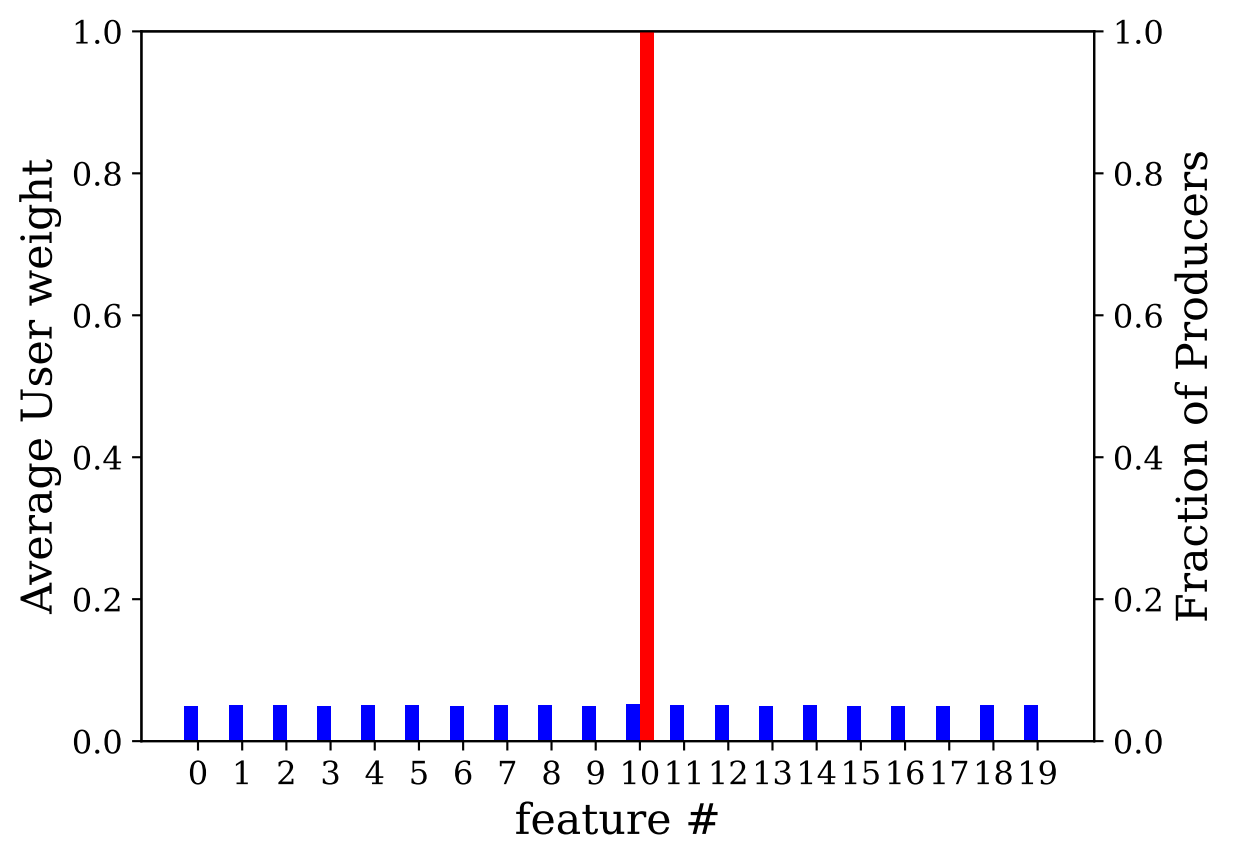

Supplement: supplementary_material [file attachment]

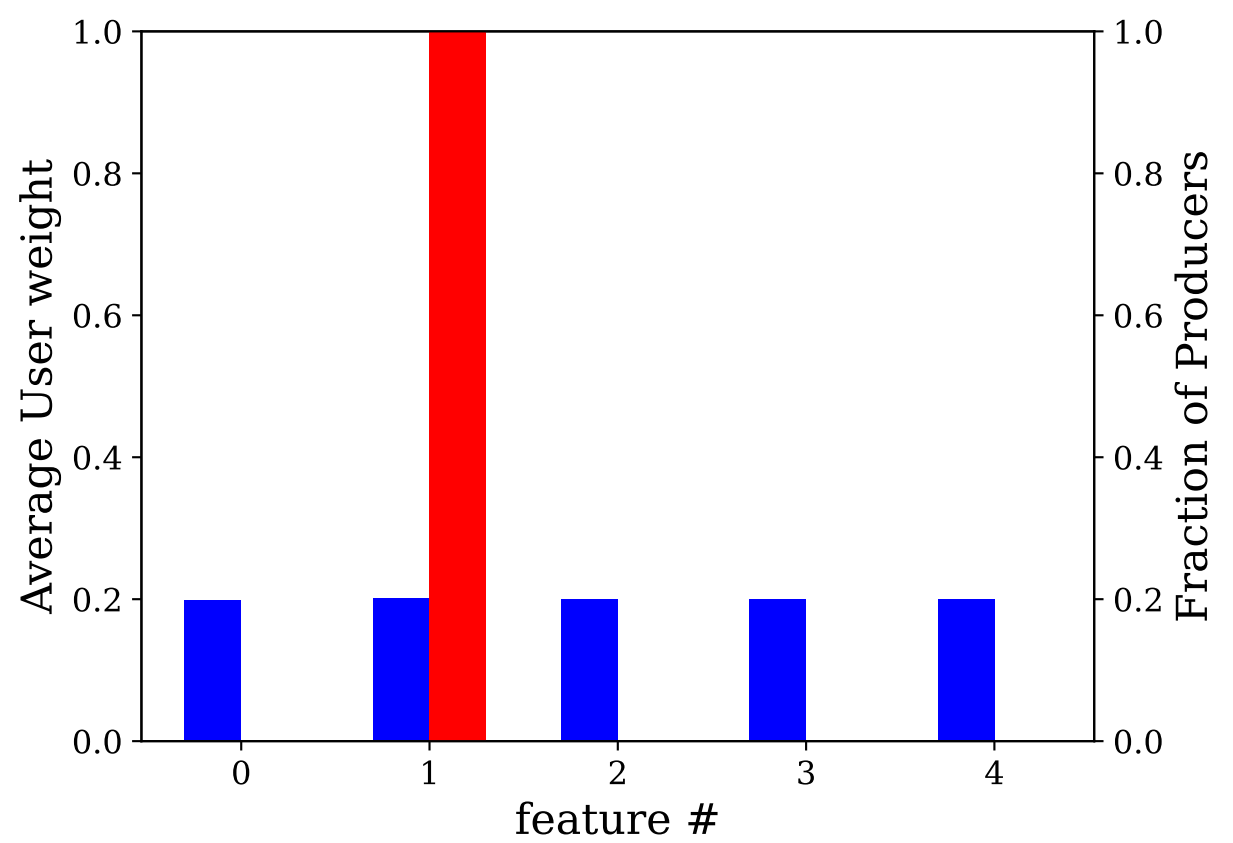

Supplement: supplementary_material [file attachment]

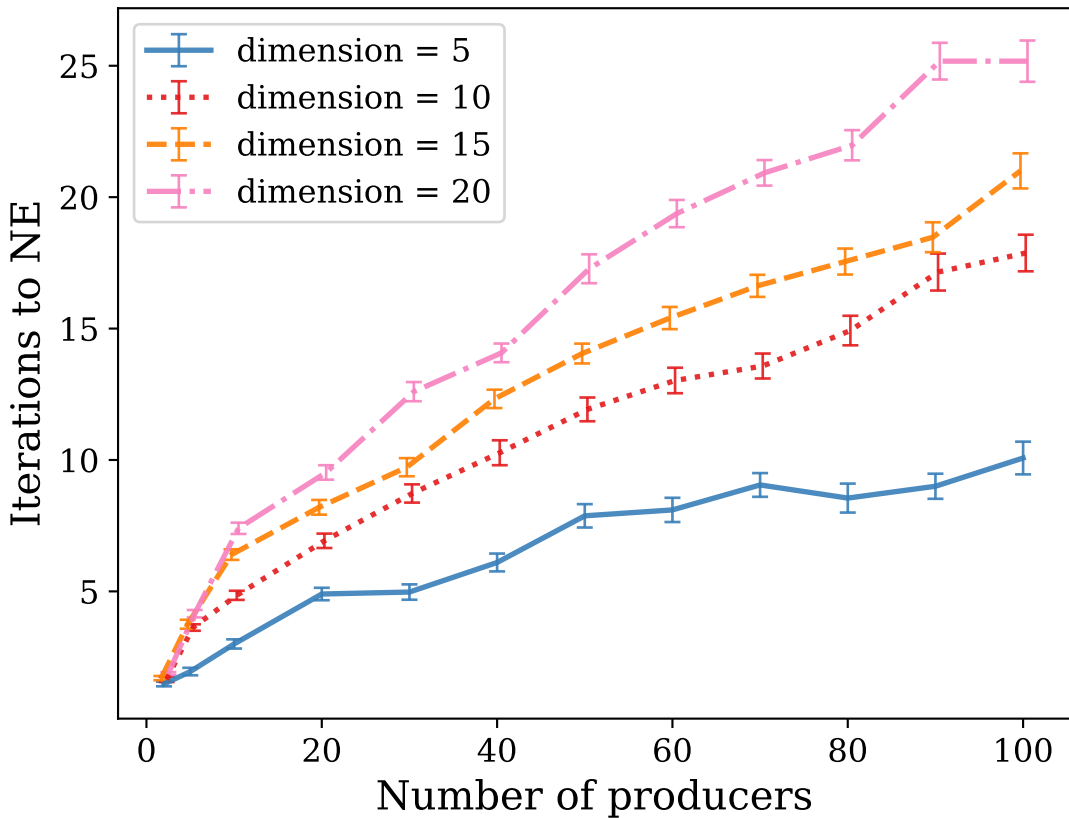

Supplement: supplementary_material [file attachment]

Average User weight

Fraction of Producers

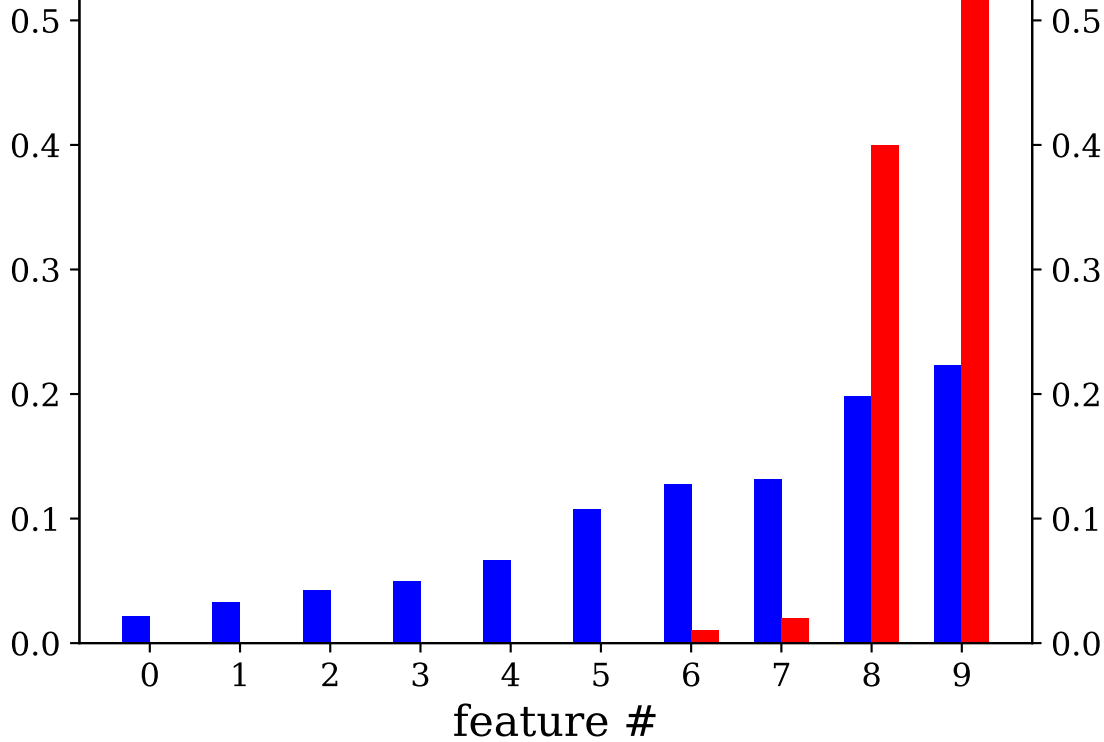

Supplement: supplementary_material [file attachment]

Average User weight

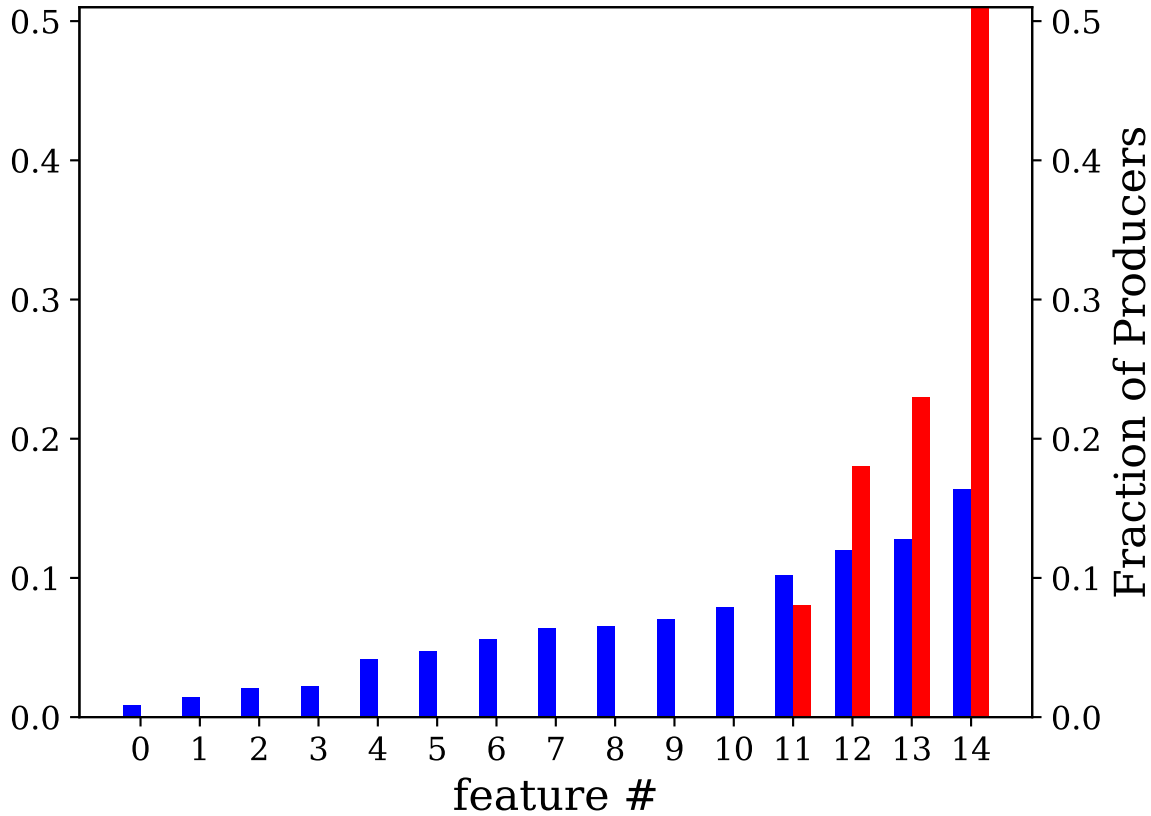

Supplement: supplementary_material [file attachment]

Average User weight

0.8  
0.6  
0.4  
0.2  
0.0

0

1

2

3

4

feature #

Fraction of Producers

0.8  
0.6  
0.4  
0.2  
0.0

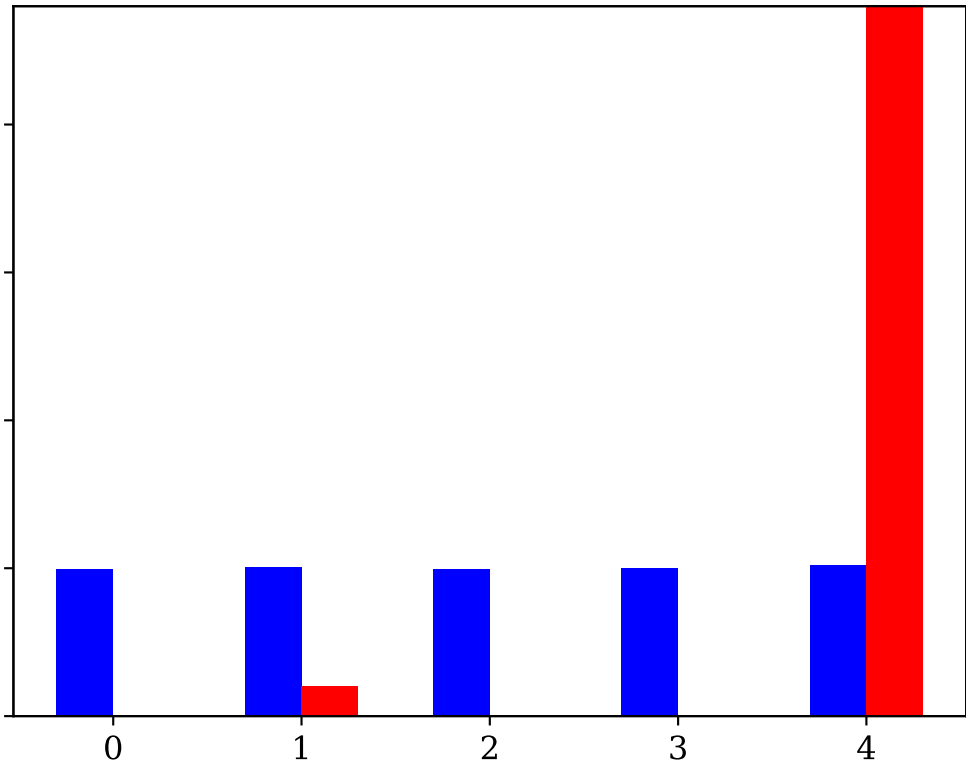

Supplement: supplementary_material [file attachment]

Average User weight

Fraction of Producers

0.30  
0.25  
0.20  
0.15  
0.10  
0.05  
0.00

0.30  
0.25  
0.20  
0.15  
0.10  
0.05  
0.00

0 1 2 3 4 5 6 7 8 9

feature #

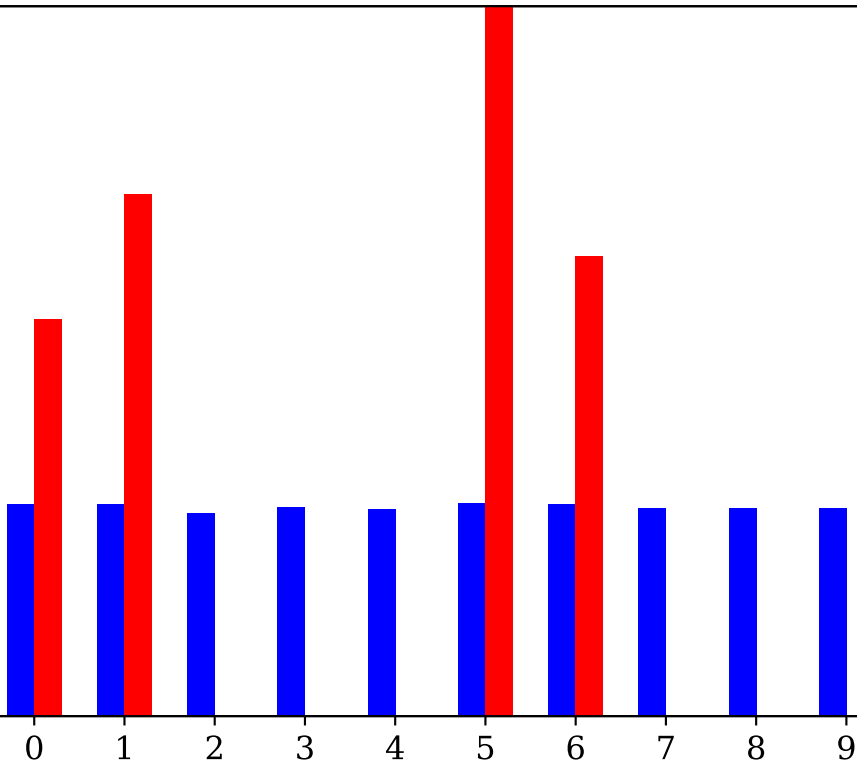

Supplement: supplementary_material [file attachment]

Average user utility

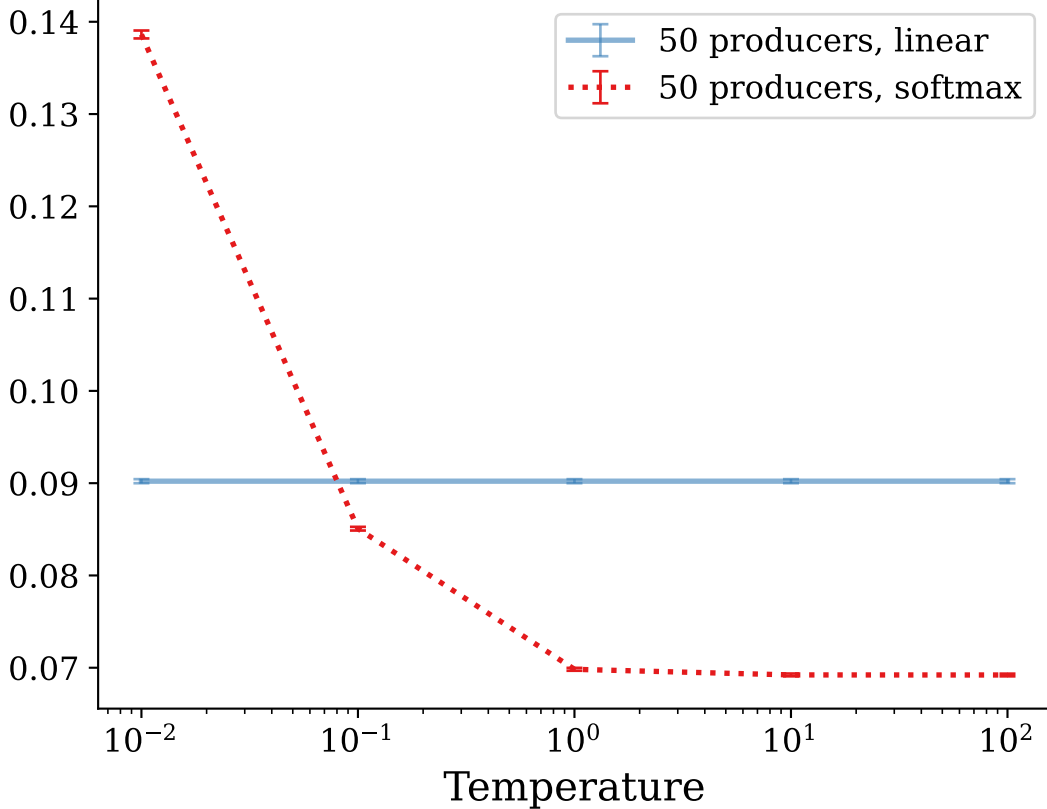

Supplement: supplementary_material [file attachment]

Average user utility

0.12

0.11

0.10

0.09

0.08

0.07

$10^{-2}$

$10^{-1}$

$10^0$

$10^1$

$10^2$

Temperature

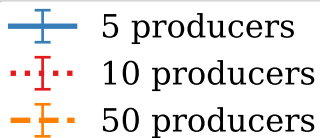

Supplement: supplementary_material [file attachment]
